# Supplementary material for: Elucidating the catalytic mechanisms of O2 generation by [Mn2(μ-O)2(terpy)2(OH2)2]3+ using DFT calculations: a focus on ClO− as oxidant
Source: Royal Society of Chemistry journal article supplement (doi:10.1039/d4dt00734d), 2024-01-01
Supplement: d4dt00734d1.pdf [file d4dt00734d1.pdf]

**Supporting Information for:**

## **Elucidating the Catalytic Mechanisms of O<sub>2</sub> Generation by [Mn<sub>2</sub>(μ-O)<sub>2</sub>(terpy)<sub>2</sub>(OH<sub>2</sub>)<sub>2</sub>]<sup>3+</sup> using DFT calculations: A Focus on ClO<sup>-</sup> as Oxidant**

Alireza Ariafard,<sup>\*a</sup> Matthew Longhurst,<sup>b</sup> Gerhard Swiegers,<sup>b</sup> Robert Stranger<sup>\*a</sup>

<sup>a</sup> Research School of Chemistry, Australian National University, Canberra, ACT 2601, Australia

<sup>b</sup> Intelligent Polymer Research Institute, University of Wollongong, Wollongong, Australia

### **Table of contents:**

Computational details (page S2)

**Fig. S1** LUMO energies for ClO<sup>-</sup>, HClO, and HCl---O (page S4)

**Benchmark calculations** (page S4)

**Fig. S2** Free energy profiles depicting the mechanism for exchanging the ClO<sup>-</sup> oxygen atom with water (page S5)

**Fig S3.** A simplified energy profile for the generation of O<sub>2</sub> from ClO<sup>-</sup>, using complex **10** as the catalyst (page S6).

**Comments to Fig. 3** (page S6)

**Table S2.** Cartesian coordinates of all structures optimized at the SMD-B/M06-L-D3/6-31G(d),SDD level of theory in water (page S7).

**Computational details.** Gaussian 16<sup>1</sup> was used to fully optimize all the structures reported in this paper at the M06-L level of theory, assuming conditions representative of a neutral pH.<sup>2</sup> The M06-L functional has been confirmed in numerous studies to provide very accurate results for transformations involving transition metal complexes.<sup>3</sup> In addition, the M06-L functional has been reported to perform well in modelling water oxidation in various studies<sup>4</sup> and specifically, benchmark calculations in a recent study clearly indicate that M06-L is more suitable compared to other functionals, including B3LYP, for simulating a water oxidation process.<sup>5</sup> For all the calculations, solvent effects were considered using the SMD-B solvation model<sup>6</sup> with water as the solvent. A recent study has suggested that using the SMD-B model with Bondi radii instead of traditional SMD improves the solvation energies of anions in water.<sup>7</sup> Consequently, we employed the SMD-B model in all our calculations to enhance the accuracy of the results. The SDD basis set with effective core potential (ECP) was chosen to describe Mn. The 6-31G(d) basis set was used for other atoms. This basis set combination will be referred to as BS1. Frequency calculations were carried out at the same level of theory as those for structural optimization. Transition structures were located using the Berny algorithm. Intrinsic reaction coordinate (IRC) calculations were used to confirm the connectivity between transition structures and minima.<sup>8</sup> To further refine the energies obtained from the SMD-B/M06-L/SDD,6-31G(d) calculations, we carried out single-point energy calculations using the M06-L functional method with SMD-B solvation model in water along with a larger basis set (BS2) for all the optimized structures. BS2 utilizes the 6-311+G(2d,p) on all atoms except for Mn for which SDD basis set with effective core potential (ECP) is used .

In this work, the free energy for each species in solution was calculated using the following formula:

$$G = E(\text{BS2}) + G(\text{BS1}) - E(\text{BS1}) + \Delta G^{1\text{atm} \rightarrow 1\text{M}} \quad (1)$$

where  $\Delta G^{1\text{atm} \rightarrow 1\text{M}} = 1.89$  kcal/mol is the free-energy change for compression of 1 mol of an ideal gas from 1 atm to the 1 M solution phase standard state.

An additional correction to Gibbs free energies was made to consider solvent (water) concentration where a  $(\text{H}_2\text{O})_n$  is directly involved in transformations. In such a case, the free energy of  $(\text{H}_2\text{O})_n$  is described as follows

$$G = E(\text{BS2}) + G(\text{BS1}) - E(\text{BS1}) + \Delta G^{1\text{atm} \rightarrow 1\text{M}} + RT \ln(55.34/n) \quad (2)$$

where the last term corresponds to the free energy required to change the standard state of  $(\text{H}_2\text{O})_n$  from 55.34/n M to 1 M.

1. Gaussian 16, Revision C.01, M. J. Frisch, G. W. Trucks, H. B. Schlegel, G. E. Scuseria, M. A. Robb, J. R. Cheeseman, G. Scalmani, V. Barone, G. A. Petersson, H. Nakatsuji, X. Li, M. Caricato, A. V. Marenich, J. Bloino, B. G. Janesko, R. Gomperts, B. Mennucci, H. P. Hratchian, J. V. Ortiz, A. F. Izmaylov, J. L. Sonnenberg, D. Williams-Young, F. Ding, F. Lipparini, F. Egidi, J. Goings, B. Peng, A. Petrone, T. Henderson, D. Ranasinghe, V. G. Zakrzewski, J. Gao, N. Rega, G. Zheng, W. Liang, M. Hada, M. Ehara, K. Toyota, R. Fukuda, J. Hasegawa, M. Ishida, T. Nakajima, Y. Honda, O. Kitao, H. Nakai, T. Vreven, K. Throssell, J. A. Montgomery, Jr., J. E. Peralta, F. Ogliaro, M. J. Bearpark, J. J. Heyd, E. N. Brothers, K. N. Kudin, V. N. Staroverov, T. A. Keith, R. Kobayashi, J. Normand, K. Raghavachari, A. P. Rendell, J. C. Burant, S. S. Iyengar, J. Tomasi, M. Cossi, J. M. Millam, M. Klene, C. Adamo, R. Cammi, J. W. Ochterski, R. L. Martin, K. Morokuma, O. Farkas, J. B. Foresman, and D. J. Fox, Gaussian, Inc., Wallingford CT, 2016.
2. Y. Zhao, D. G. Truhlar, *J. Chem. Phys.* 2006, **125**, 194101.
3. (a) L. S. Yamout, M. Ataya, F. Hasanayn; P. L. Holland, A. J. Miller, A. S. Goldman, *J. Am. Chem. Soc.* 2021, **143**, 9744-9757. (b) R. K. Raju, A. A. Bengali, E. N. Brothers, *Dalton Trans.* 2016, **45**, 13766-13778. (c) Y. Minenkov, Å. Singstad, G. Occhipinti, V. R. Jensen, *Dalton Trans.* 2012, **41**, 5526-5541. (d) D. G. Gusev, *Organometallics* 2013, **32**, 4239-4243. (e) Y. Zhao, D. G. Truhlar, *Acc. Chem. Res.* 2008, **41**, 157-167.
4. (a) F. Bozoglian, S. Romain, M. Z. Ertem, T. K. Todorova, C. Sens, J. Mola, M. Rodriguez, I. Romero, J. Benet-Buchholz, X. Fontrodona, C. J. Cramer, L. Gagliardi and A. Llobet, *J. Am. Chem. Soc.*, 2009, **131**, 15176-15187; (b) X. Guan, S. L.-F. Chan and C.-M. Che, *Chem. – Asian J.*, 2013, **8**, 2046-2056. (c) M. Z. Ertem, L. Gagliardi and C. J. Cramer, *Chem. Sci.*, 2012, **3**, 1293-1299. (d) A. Poater, *Catal. Commun.*, 2014, **44**, 2-5.

- W.-P. To, T. W.-S. Chow, C.-W. Tse, X. Guan, J.-S. Huanga, C.-M. Che, *Chem. Sci.*, 2015, **6**, 5891–5903.
- A. V. Marenich, C. J. Cramer, D. G. Truhlar, *J. Phys. Chem. B* 2009, **113**, 6378-6396.
- S. Mirzaei, M. V. Ivanov, Q. K. Timerghazin, *J. Phys. Chem. A*, 2019, **123**, 9498–9504.
- (a) K. Fukui, *Acc. Chem. Res.*, 1981, **14**, 363-368. (b) K. Fukui, *J. Phys. Chem.*, 1970, **74**, 4161-4163.

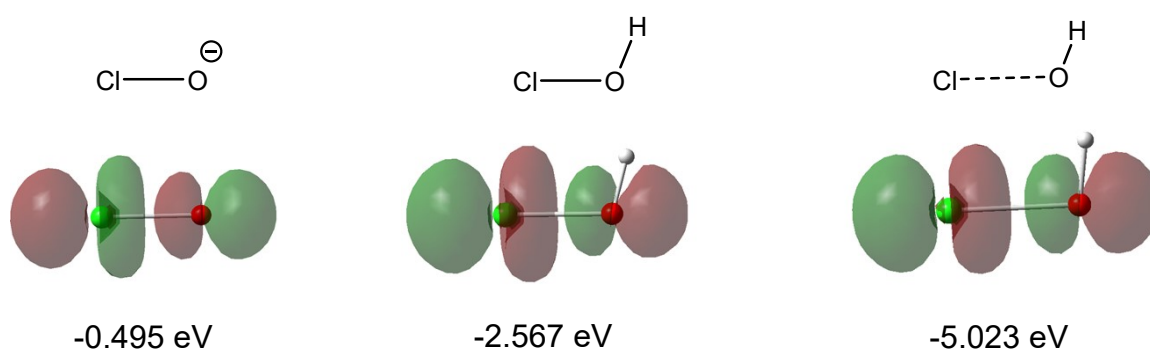

**Fig. S1** LUMO energies for  $\text{ClO}^-$ ,  $\text{HClO}$ , and  $\text{HCl}\cdots\text{O}$  (the  $\text{HCl}\cdots\text{O}$  species is a deformed  $\text{HOCl}$  with geometry in transition structure  $\text{TS}_{9,10}$ ).

**Benchmark calculations.** Our benchmark calculations reveal that among the B3LYP, M06, and M06L functionals, only M06L produces results aligning with experimental data. According to Table S1, B3LYP and M06 predict relatively high activation energies for Mn(III) oxidation via transition structures  $\text{TS}_{20-21}$  and  $\text{TS}_{20-22}$ . Additionally, they indicate that ligand oxidation through transition structure  $\text{TS}$  takes place considerably faster than Mn(III) oxidation, a finding that conflicts with existing experimental data. In contrast, M06L accurately forecasts a lower activation energy for Mn(III) oxidation and correctly indicates that metal oxidation proceeds more rapidly than ligand oxidation.

**Table S1.** Comparison of calculated free energies for Mn(III) oxidation via transition structures  $\text{TS}_{20-21}$  and  $\text{TS}_{20-22}$ , and ligand oxidation through transition structure  $\text{TS}$  at the SMD-B/Method-D3/6-311+G(2d,p), SDD//SMD-B/B3LYP-D3/6-31G(d),SDD levels of theory, with relative energies in kcal/mol

| Method | 1   | $\text{TS}_{20-21}$ | $\text{TS}_{20-22}$ | $\text{TS}$ |
|--------|-----|---------------------|---------------------|-------------|
| B3LYP  | 0.0 | 23.1                | 24.2                | 15.8        |
| M06    | 0.0 | 26.5                | 26.3                | 20.9        |
| M06L   | 0.0 | 9.2                 | 6.8                 | 12.5        |

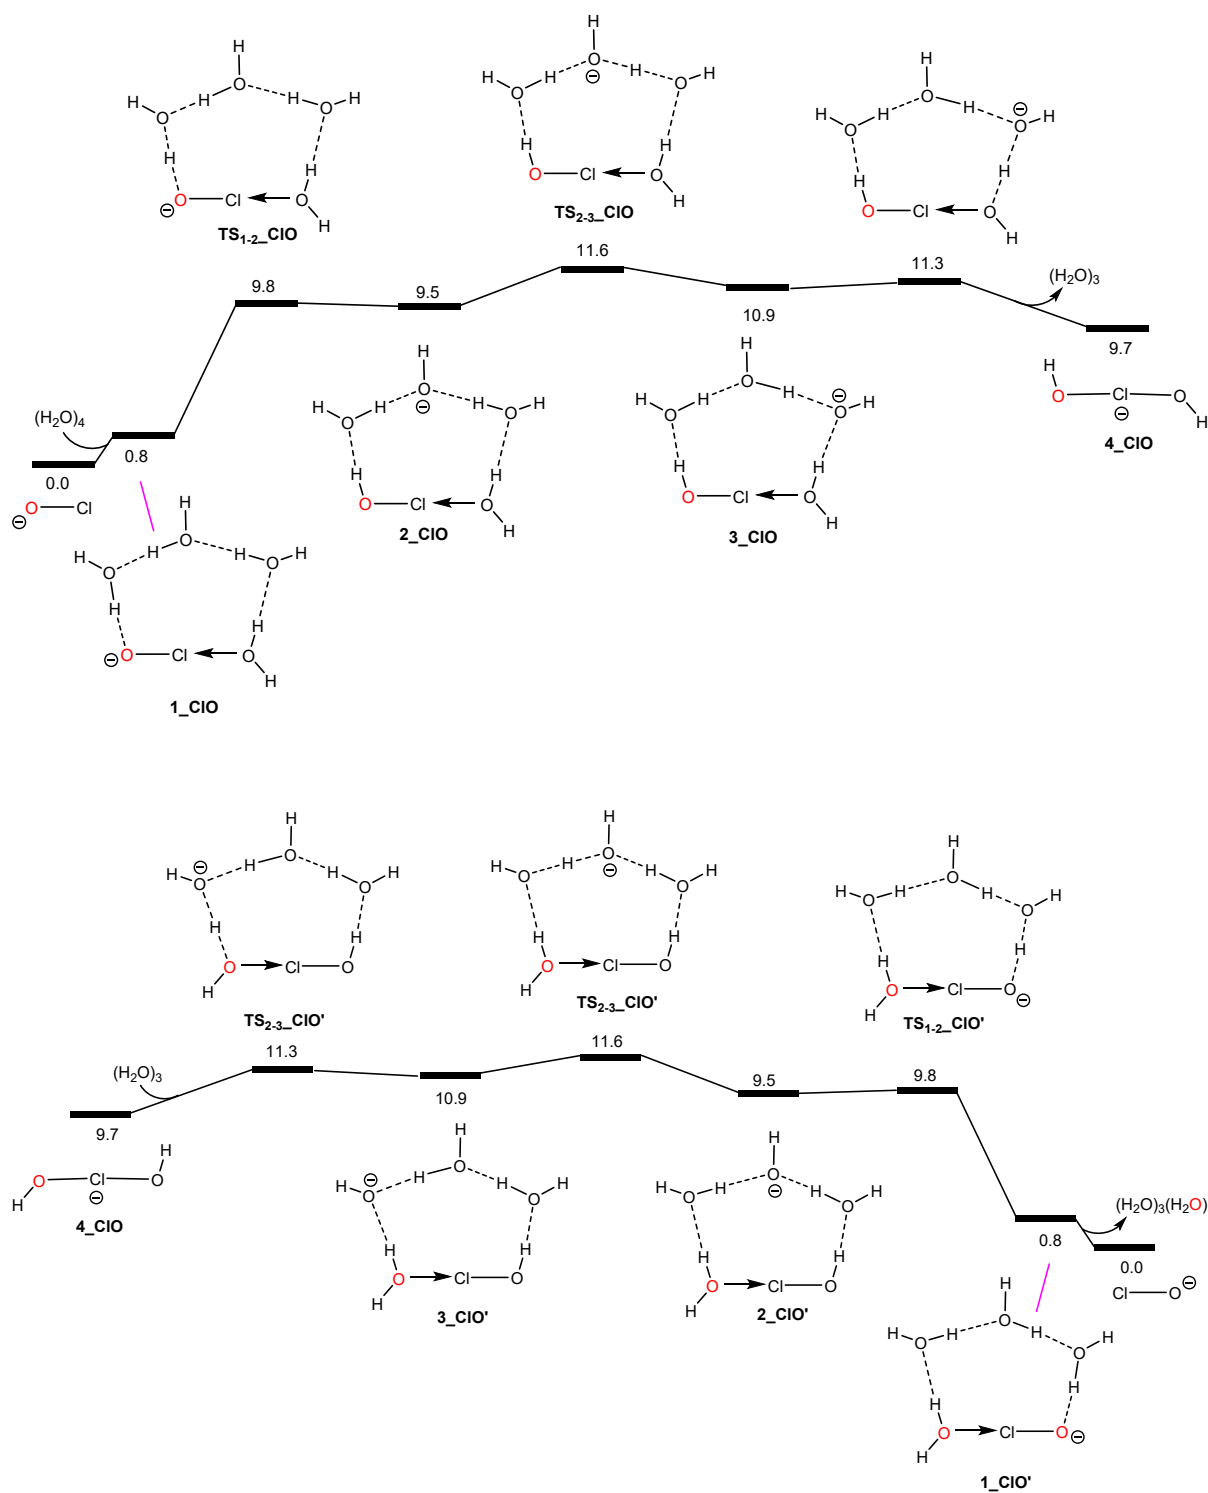

**Fig. S2** Free energy profiles depicting the mechanism for exchanging the ClO<sup>-</sup> oxygen atom with water, involving ClO<sup>-</sup> hydrolysis to yield **4\_CIO** (top profile), followed by **4\_CIO** condensation, recreating ClO<sup>-</sup> with its oxygen derived from water (bottom profile). The relative free energy values are in kcal/mol.

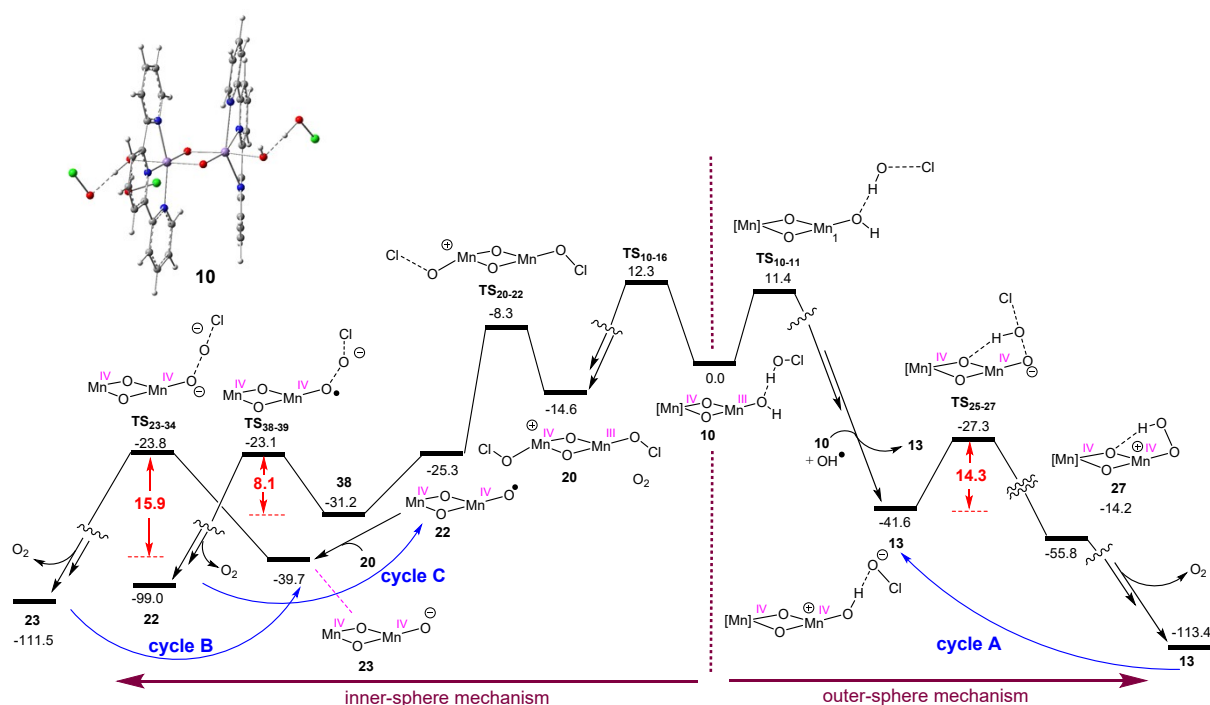

**Fig S3.** A simplified energy profile for the generation of O<sub>2</sub> from ClO<sup>-</sup>, using complex **10** as the catalyst. The relative Free energy values are in kcal/mol.

### Comments to Fig S3

- Oxidation of complex **10** through an outer-sphere mechanism produces complex **13** as the active catalyst, while oxidation through an inner-sphere mechanism results in two active catalysts, **22** and **23**.
- Given that the energy levels of the two transition structures, **TS<sub>10-11</sub>** and **TS<sub>10-16</sub>**, are very similar, it is anticipated that the inner- and outer-sphere mechanisms will be competitive.
- According to our calculations, the concentration of active catalyst **22** is expected to be significantly lower than that of active catalysts **13** and **23**. Drawing from experimental findings (ref 6a), we can estimate that its concentration should be around 2% of the Mn catalyst used.
- Although the concentration of catalyst **22** is much lower than that of **13** and **23**, it is significantly more reactive than both, outperforming them in catalytic activity. This advantage is evidenced by a substantially lower energy barrier for O-O coupling from **22** (8.1 kcal/mol) compared to **13** (14.3 kcal/mol) and **23** (15.9 kcal/mol)
- Our conclusion that complex **22** serves as the active catalyst for O<sub>2</sub> generation aligns with the kinetic data presented in ref 4b.

**Table S2.** Cartesian coordinates of all structures optimized at the SMD-B/M06-L-D3/6-31G(d),SDD level of theory in water.

**2\_c1o**

|    |             |             |             |
|----|-------------|-------------|-------------|
| O  | 1.53571800  | -1.69489500 | 0.01240800  |
| Cl | -0.16014600 | -1.35634800 | -0.09766400 |
| O  | -2.67979500 | -0.43307600 | -0.17985800 |
| H  | -2.20809500 | 0.38865700  | 0.12557500  |
| H  | -2.88138000 | -0.88454500 | 0.65272700  |
| O  | 0.60399300  | 1.84462000  | -1.10382800 |
| H  | 1.57138300  | 1.25398800  | -0.17311500 |
| O  | -1.25159700 | 1.74626600  | 0.70564200  |
| H  | -0.79834000 | 1.26177200  | 1.41082100  |
| H  | -0.52233400 | 1.80508500  | -0.03012900 |
| O  | 2.23584200  | 0.79298300  | 0.52500800  |
| H  | 1.88964200  | -0.75948400 | 0.21573400  |
| H  | 0.34881700  | 1.04448200  | -1.58367700 |
| H  | 1.76952100  | 0.90077600  | 1.36738300  |

**TS2-3\_c1o**

|    |             |             |             |
|----|-------------|-------------|-------------|
| O  | -1.87736200 | -1.40074200 | -0.00566400 |
| Cl | -0.13978900 | -1.35175200 | 0.09613100  |
| O  | 2.43666900  | -0.91497900 | 0.16706400  |
| H  | 2.15546900  | -0.00477400 | -0.18662700 |
| H  | 2.58504100  | -1.42457800 | -0.64280800 |
| O  | 0.01560700  | 1.92261900  | 1.05000400  |
| H  | -1.29034400 | 1.52265300  | 0.16035200  |
| O  | 1.58907400  | 1.42948500  | -0.75332000 |
| H  | 0.98854000  | 1.05899900  | -1.41537700 |
| H  | 0.80066100  | 1.69068000  | 0.17251100  |
| O  | -2.06497600 | 1.23713200  | -0.43632300 |
| H  | -2.06196900 | -0.42103300 | -0.16407500 |
| H  | 0.07391900  | 1.12011900  | 1.58778100  |
| H  | -1.66699800 | 1.24960300  | -1.32005900 |

**3\_c1o**

|    |             |             |             |
|----|-------------|-------------|-------------|
| O  | -1.95655300 | -1.32043300 | -0.00159100 |
| Cl | -0.20768500 | -1.31530500 | 0.10091300  |
| O  | 2.31906000  | -1.02520800 | 0.18222600  |
| H  | 2.12866200  | -0.08150300 | -0.22233500 |
| H  | 2.46654400  | -1.57303000 | -0.60244100 |
| O  | 0.13069900  | 1.91623600  | 1.09218100  |
| H  | -1.25777300 | 1.58366500  | 0.12786500  |
| O  | 1.75867000  | 1.29526200  | -0.80013400 |
| H  | 1.07709700  | 0.99036800  | -1.41515400 |
| H  | 0.81747000  | 1.68473800  | 0.33680000  |
| O  | -2.01758400 | 1.34396600  | -0.47804200 |
| H  | -2.11086500 | -0.34371500 | -0.17386800 |
| H  | 0.12674100  | 1.10740800  | 1.62495800  |
| H  | -1.59157100 | 1.31366900  | -1.34844900 |

**TS3-4\_c1o**

|    |             |             |             |
|----|-------------|-------------|-------------|
| O  | -1.99191600 | -1.29652100 | 0.02894200  |
| Cl | -0.21351600 | -1.29126400 | 0.11380900  |
| O  | 2.20296300  | -1.06960300 | 0.17766800  |
| H  | 2.06606500  | -0.02640000 | -0.28098400 |
| H  | 2.35475900  | -1.63044600 | -0.59712800 |
| O  | 0.16376100  | 1.95900200  | 1.08277100  |
| H  | -1.23262500 | 1.61935900  | 0.08114300  |
| O  | 1.84822900  | 1.17087300  | -0.77375600 |

|                                     |             |             |             |
|-------------------------------------|-------------|-------------|-------------|
| H                                   | 1.16229600  | 0.97481500  | -1.42756600 |
| H                                   | 0.84923400  | 1.67480200  | 0.37677400  |
| O                                   | -1.97721000 | 1.38648800  | -0.53924800 |
| H                                   | -2.13645600 | -0.32894000 | -0.16756500 |
| H                                   | 0.11854800  | 1.18039300  | 1.65700600  |
| H                                   | -1.51867200 | 1.28599100  | -1.38745300 |
| <b>(H<sub>2</sub>O)<sub>3</sub></b> |             |             |             |
| O                                   | -1.11579700 | -1.18065900 | -0.11101700 |
| H                                   | -1.34089400 | -1.36176700 | 0.81385800  |
| H                                   | 0.74093600  | -0.89688500 | 0.05139400  |
| O                                   | 1.57578800  | -0.38007200 | 0.12376800  |
| H                                   | 1.92168100  | -0.39968700 | -0.78118800 |
| H                                   | 0.40748600  | 1.08340700  | -0.00822600 |
| O                                   | -0.44970200 | 1.55862800  | -0.10437400 |
| H                                   | -0.67095400 | 1.78930100  | 0.81035900  |
| H                                   | -1.14056800 | -0.19754800 | -0.15320900 |
| <b>4 ClO</b>                        |             |             |             |
| O                                   | 2.04176900  | -0.08903700 | -0.03779300 |
| Cl                                  | 0.00015800  | -0.00046400 | -0.02905600 |
| O                                   | -2.04186600 | 0.08970200  | -0.03810700 |
| H                                   | -2.19588700 | -0.66380100 | 0.55149100  |
| H                                   | 2.19396800  | 0.66637000  | 0.54966000  |
| <b>10</b>                           |             |             |             |
| Mn                                  | -1.24621500 | 0.08110900  | -0.83464100 |
| O                                   | -0.31844100 | -0.27135900 | 0.76281000  |
| N                                   | -2.09113900 | -2.08243300 | -0.83621300 |
| N                                   | -3.04543400 | 0.01193700  | 0.46790100  |
| N                                   | -1.92948500 | 2.25942400  | -0.38058800 |
| C                                   | -1.53572000 | -3.08477600 | -1.51928900 |
| H                                   | -0.88666400 | -2.79392100 | -2.34575100 |
| C                                   | -1.75168500 | -4.42238900 | -1.20441400 |
| H                                   | -1.27975200 | -5.20600600 | -1.79027100 |
| C                                   | -2.56901600 | -4.71628900 | -0.11832700 |
| H                                   | -2.75153900 | -5.74706400 | 0.17484300  |
| C                                   | -3.15542200 | -3.67642000 | 0.59501200  |
| H                                   | -3.79047400 | -3.89125100 | 1.44945600  |
| C                                   | -2.90228300 | -2.36084600 | 0.20405800  |
| C                                   | -3.49556100 | -1.18658000 | 0.87724100  |
| C                                   | -4.47954000 | -1.28940500 | 1.86278100  |
| H                                   | -4.85330800 | -2.25818100 | 2.17901100  |
| C                                   | -4.98422200 | -0.12433300 | 2.42486600  |
| H                                   | -5.74867800 | -0.17682100 | 3.19550100  |
| C                                   | -4.50881800 | 1.10887200  | 1.99886700  |
| H                                   | -4.88877500 | 2.02510700  | 2.43944000  |
| C                                   | -3.52780200 | 1.14551700  | 1.00543900  |
| C                                   | -2.96221300 | 2.40294400  | 0.47235700  |
| C                                   | -3.46984700 | 3.66421800  | 0.79123500  |
| H                                   | -4.30590200 | 3.77157500  | 1.47589000  |
| C                                   | -2.90423900 | 4.78769200  | 0.19899700  |
| H                                   | -3.28995100 | 5.77704300  | 0.43202100  |
| C                                   | -1.85210800 | 4.62982700  | -0.69713400 |
| H                                   | -1.38596400 | 5.48163500  | -1.18415400 |
| C                                   | -1.39588700 | 3.34107900  | -0.95100600 |
| H                                   | -0.56146500 | 3.15968400  | -1.62991100 |
| Mn                                  | 1.31507300  | 0.06727200  | 0.14070600  |
| O                                   | 2.10019100  | -0.30406200 | 1.86415200  |
| O                                   | 0.48220600  | 0.38630500  | -1.46208000 |
| N                                   | 1.45941400  | 2.07809000  | 0.58920800  |
| C                                   | 0.62037400  | 2.72585500  | 1.39998200  |
| H                                   | -0.17127600 | 2.12635700  | 1.84320100  |



|    |             |             |             |
|----|-------------|-------------|-------------|
| C  | 0.74766200  | 4.08654100  | 1.65211800  |
| H  | 0.04047100  | 4.57852700  | 2.31315800  |
| C  | 1.77541800  | 4.78526600  | 1.02960100  |
| H  | 1.89542100  | 5.85289100  | 1.19253400  |
| C  | 2.66491200  | 4.10397600  | 0.20509300  |
| H  | 3.49034000  | 4.62502100  | -0.27055700 |
| C  | 2.49654100  | 2.73689700  | 0.00746600  |
| C  | 3.40341900  | 1.88663200  | -0.77475000 |
| N  | 3.07876400  | 0.58541100  | -0.73511800 |
| N  | 2.03860400  | -1.75817200 | -0.53703200 |
| C  | 3.21163300  | -1.70796000 | -1.22314200 |
| C  | 3.77573100  | -0.35993600 | -1.38125000 |
| C  | 4.90775200  | -0.00545400 | -2.11462700 |
| C  | 5.26945700  | 1.33830900  | -2.16502000 |
| C  | 4.51874800  | 2.30359600  | -1.50032800 |
| H  | 4.79650800  | 3.35203200  | -1.54588900 |
| H  | 6.14431700  | 1.63685500  | -2.73601500 |
| H  | 5.48685600  | -0.75657000 | -2.64293700 |
| C  | 3.80073300  | -2.87273100 | -1.70493900 |
| H  | 4.73962900  | -2.82165900 | -2.24837600 |
| C  | 3.18199000  | -4.09513300 | -1.46594300 |
| H  | 3.63361300  | -5.01308500 | -1.83234900 |
| C  | 1.99010200  | -4.13002300 | -0.75173400 |
| H  | 1.47854800  | -5.06401100 | -0.53896700 |
| C  | 1.44920000  | -2.93177600 | -0.30024600 |
| H  | 0.52110300  | -2.89412700 | 0.26500700  |
| H  | 3.06898600  | -0.55126600 | 1.72789100  |
| H  | 1.63926800  | -1.67182000 | 2.40476200  |
| O  | 1.53312100  | -2.62773500 | 2.80104300  |
| Cl | -0.16132200 | -2.86770200 | 2.91956200  |
| O  | -2.07292600 | 0.33402500  | -2.59603000 |
| H  | -1.65513900 | 1.14252700  | -2.93534700 |
| H  | -3.50841600 | 0.81034500  | -2.32063200 |
| O  | 4.63071000  | -1.09826400 | 1.56095000  |
| O  | -4.46318000 | 1.18478500  | -2.15008600 |
| Cl | -5.43140200 | -0.22539300 | -2.03325900 |
| Cl | 5.52192500  | 0.37593600  | 1.63933500  |

**TS10-11**

|    |             |             |             |
|----|-------------|-------------|-------------|
| Mn | -0.88059100 | 0.05804400  | -0.50370700 |
| O  | -1.28587500 | 0.44532400  | -2.32851600 |
| O  | -0.41903800 | -0.44547300 | 1.21065400  |
| N  | -1.56420200 | -1.89373800 | -0.82645500 |
| N  | -2.81753200 | 0.12070300  | 0.14678100  |
| N  | -1.12371500 | 2.04468800  | -0.03592300 |
| C  | -0.82876600 | -2.84986400 | -1.39511700 |
| H  | 0.12937600  | -2.53613500 | -1.80254300 |
| C  | -1.26469400 | -4.16842300 | -1.46154100 |
| H  | -0.63298100 | -4.92095000 | -1.92410800 |
| C  | -2.50355400 | -4.48711400 | -0.91799600 |
| H  | -2.87153800 | -5.50913900 | -0.94377700 |
| C  | -3.27852800 | -3.48424600 | -0.34478200 |
| H  | -4.25410100 | -3.71001000 | 0.07550600  |
| C  | -2.78659100 | -2.18307700 | -0.31239200 |
| C  | -3.49963400 | -1.03035600 | 0.25171100  |
| C  | -4.75424700 | -1.04418100 | 0.85924100  |
| H  | -5.31832900 | -1.96653700 | 0.95525200  |
| C  | -5.26533800 | 0.15511300  | 1.34664900  |
| H  | -6.24244800 | 0.16955500  | 1.82125100  |
| C  | -4.53076300 | 1.33308800  | 1.24630000  |
| H  | -4.91885100 | 2.26626800  | 1.64305000  |
| C  | -3.27613300 | 1.28053500  | 0.64039700  |
| C  | -2.33306300 | 2.39306100  | 0.47836200  |

|    |             |             |             |
|----|-------------|-------------|-------------|
| C  | -2.61277500 | 3.71888200  | 0.79281900  |
| H  | -3.58019100 | 3.98529000  | 1.20782600  |
| C  | -1.64987600 | 4.69283200  | 0.54906100  |
| H  | -1.85908000 | 5.73298300  | 0.78392900  |
| C  | -0.42780100 | 4.32267000  | 0.00115000  |
| H  | 0.35118200  | 5.05071700  | -0.20485400 |
| C  | -0.19850700 | 2.97937600  | -0.27385400 |
| H  | 0.74749100  | 2.62362300  | -0.67334300 |
| Mn | 1.38509600  | -0.54590000 | 0.91922500  |
| O  | 1.65967600  | -1.34792500 | 2.64964500  |
| O  | 0.86992300  | -0.00315800 | -0.81282900 |
| N  | 1.71451400  | 1.51026100  | 1.74843800  |
| C  | 0.86073800  | 2.11009000  | 2.57960800  |
| H  | 0.00923000  | 1.51115800  | 2.89993000  |
| C  | 1.03497100  | 3.42249300  | 3.00291200  |
| H  | 0.31683100  | 3.87532900  | 3.68028100  |
| C  | 2.13226200  | 4.13038400  | 2.52284800  |
| H  | 2.29666300  | 5.16336200  | 2.81873300  |
| C  | 3.02476800  | 3.50490900  | 1.65958200  |
| H  | 3.89434700  | 4.03714000  | 1.28558300  |
| C  | 2.79517700  | 2.17793400  | 1.29495300  |
| C  | 3.68622900  | 1.40065000  | 0.41804000  |
| N  | 3.38042500  | 0.09540300  | 0.29949900  |
| N  | 2.43315600  | -2.33109200 | 0.03784700  |
| C  | 3.60232200  | -2.09082000 | -0.59528100 |
| C  | 4.08736100  | -0.70458200 | -0.51600100 |
| C  | 5.18390900  | -0.21793600 | -1.22901700 |
| C  | 5.52404400  | 1.12210000  | -1.09437900 |
| C  | 4.77184100  | 1.94710000  | -0.26795500 |
| H  | 5.01411200  | 3.00118200  | -0.17374100 |
| H  | 6.36805100  | 1.52822300  | -1.64507200 |
| H  | 5.75093700  | -0.86808800 | -1.88774900 |
| C  | 4.28454900  | -3.11454300 | -1.25069400 |
| H  | 5.22625400  | -2.91555400 | -1.75317500 |
| C  | 3.75216600  | -4.39878400 | -1.23995300 |
| H  | 4.27176300  | -5.20738500 | -1.74745400 |
| C  | 2.56056700  | -4.63654500 | -0.56464300 |
| H  | 2.11465800  | -5.62578900 | -0.52166400 |
| C  | 1.93726700  | -3.56343200 | 0.06360200  |
| H  | 0.99662200  | -3.69036600 | 0.61131700  |
| H  | -0.57947500 | 1.09779100  | -2.63658300 |
| H  | -2.54787400 | 1.29088500  | -2.40006900 |
| H  | 2.46288800  | -1.88810500 | 2.57162700  |
| O  | -0.24638600 | -3.31335700 | 2.08831600  |
| H  | 0.36828400  | -2.56280700 | 2.33644200  |
| Cl | -1.74597900 | -2.83650500 | 3.33305800  |
| O  | 0.33294800  | 2.35742900  | -3.27426800 |
| O  | -3.39462100 | 1.89468600  | -2.46934900 |
| Cl | -4.66631700 | 0.75494400  | -2.62396800 |
| Cl | 2.02492200  | 2.22486200  | -2.96361100 |

**11**

|    |             |             |             |
|----|-------------|-------------|-------------|
| Mn | 0.80013500  | 0.07993900  | -0.62054300 |
| O  | 1.13015600  | 0.01390400  | -2.46516800 |
| O  | 0.32728000  | 0.28645600  | 1.19843800  |
| N  | 1.37777700  | 2.08039500  | -0.64784700 |
| N  | 2.70632500  | 0.01343800  | 0.09794300  |
| N  | 1.16996100  | -1.93490300 | -0.52479400 |
| C  | 0.64191400  | 3.05914100  | -1.17599000 |
| H  | -0.29800800 | 2.75844300  | -1.63492800 |
| C  | 1.05666900  | 4.38578300  | -1.13635100 |
| H  | 0.42999200  | 5.15773500  | -1.57222700 |
| C  | 2.26891000  | 4.68706700  | -0.52707400 |

|    |             |             |             |
|----|-------------|-------------|-------------|
| H  | 2.62030300  | 5.71385700  | -0.47523700 |
| C  | 3.04165800  | 3.66136100  | 0.00801200  |
| H  | 4.00065800  | 3.87228200  | 0.47169100  |
| C  | 2.57684600  | 2.35265800  | -0.06984500 |
| C  | 3.30731400  | 1.17256200  | 0.40833500  |
| C  | 4.50747400  | 1.16330700  | 1.11802900  |
| H  | 5.00943900  | 2.09019900  | 1.37692900  |
| C  | 5.04150700  | -0.06478500 | 1.49747200  |
| H  | 5.97363800  | -0.09646600 | 2.05450900  |
| C  | 4.38517500  | -1.25244800 | 1.18787800  |
| H  | 4.78881400  | -2.20955100 | 1.50316600  |
| C  | 3.18723000  | -1.18017300 | 0.47930300  |
| C  | 2.33682400  | -2.30241600 | 0.06655400  |
| C  | 2.66499300  | -3.64821200 | 0.19839000  |
| H  | 3.59659900  | -3.93672000 | 0.67583700  |
| C  | 1.80065000  | -4.60955200 | -0.31521000 |
| H  | 2.04656700  | -5.66403900 | -0.22328200 |
| C  | 0.63468900  | -4.20988300 | -0.95878000 |
| H  | -0.05731900 | -4.93007700 | -1.38459800 |
| C  | 0.34711100  | -2.85276600 | -1.03901700 |
| H  | -0.54438800 | -2.46723500 | -1.53322800 |
| Mn | -1.42565500 | 0.14687100  | 1.01097900  |
| O  | -1.71138200 | 0.37465700  | 2.86975000  |
| O  | -0.97315400 | 0.06330600  | -0.81462500 |
| N  | -1.64813200 | -1.88578000 | 1.25516500  |
| C  | -0.76232200 | -2.64880200 | 1.90092200  |
| H  | 0.12274700  | -2.13981300 | 2.27738500  |
| C  | -0.96422700 | -4.01291900 | 2.06918800  |
| H  | -0.22286900 | -4.60348900 | 2.59849900  |
| C  | -2.11256100 | -4.58828300 | 1.53565200  |
| H  | -2.29527500 | -5.65438000 | 1.63904200  |
| C  | -3.03948100 | -3.78742100 | 0.87690500  |
| H  | -3.95518000 | -4.21084000 | 0.47524400  |
| C  | -2.79460600 | -2.42245300 | 0.76031400  |
| C  | -3.71701900 | -1.44910300 | 0.16142300  |
| N  | -3.33842500 | -0.17608100 | 0.35609500  |
| N  | -2.14926400 | 2.07167100  | 0.71962300  |
| C  | -3.36134800 | 2.15887500  | 0.11116700  |
| C  | -4.00254400 | 0.86759900  | -0.16412600 |
| C  | -5.17020600 | 0.65370600  | -0.89430800 |
| C  | -5.60117000 | -0.65691000 | -1.08060500 |
| C  | -4.87800300 | -1.72587800 | -0.55896600 |
| H  | -5.20108200 | -2.74906900 | -0.72409900 |
| H  | -6.50436800 | -0.84792000 | -1.65319300 |
| H  | -5.71953500 | 1.48610900  | -1.32311300 |
| C  | -3.91398700 | 3.40021400  | -0.18489100 |
| H  | -4.88350000 | 3.46084000  | -0.67028000 |
| C  | -3.21733400 | 4.55305400  | 0.16425800  |
| H  | -3.63708200 | 5.52966800  | -0.06089600 |
| C  | -1.99275400 | 4.44348600  | 0.81196500  |
| H  | -1.42287600 | 5.31885600  | 1.10827900  |
| C  | -1.48669700 | 3.17485100  | 1.07293300  |
| H  | -0.53251000 | 3.02072600  | 1.57724200  |
| H  | 0.36471900  | -0.53109000 | -2.86197600 |
| H  | 2.46951100  | -0.75557900 | -2.67608600 |
| H  | -2.52302300 | 0.90024000  | 2.96722800  |
| O  | 0.41548200  | 2.18844200  | 3.47822800  |
| H  | -0.23999500 | 1.48806700  | 3.22704800  |
| Cl | 2.02352700  | 0.08092600  | 4.14291400  |
| O  | -0.88072100 | -1.36470000 | -3.49825000 |
| O  | 3.37360000  | -1.23421500 | -2.80508400 |
| Cl | 4.48643700  | 0.07059100  | -2.82047900 |
| Cl | -1.96490400 | -0.11651400 | -3.99070900 |

## 12

|    |             |             |             |
|----|-------------|-------------|-------------|
| Mn | -1.14882400 | 0.15520300  | 0.24077900  |
| O  | -1.86463200 | 0.08088600  | 1.97032400  |
| O  | -0.31711600 | 0.18900200  | -1.47351600 |
| N  | -1.33664500 | 2.21658300  | 0.32723700  |
| N  | -2.87219500 | 0.50102400  | -0.78784700 |
| N  | -1.85648200 | -1.75040400 | -0.09897100 |
| C  | -0.54875700 | 2.99281100  | 1.07490500  |
| H  | 0.24782800  | 2.48768200  | 1.61756800  |
| C  | -0.73476300 | 4.36797000  | 1.14742100  |
| H  | -0.07013100 | 4.96701400  | 1.76236600  |
| C  | -1.76778700 | 4.94009200  | 0.41477200  |
| H  | -1.93678400 | 6.01298500  | 0.44335500  |
| C  | -2.60023400 | 4.12657400  | -0.34678300 |
| H  | -3.42945000 | 4.54994700  | -0.90513300 |
| C  | -2.37349000 | 2.75394500  | -0.36625500 |
| C  | -3.21279300 | 1.77014500  | -1.06109400 |
| C  | -4.27162300 | 2.03589000  | -1.92822100 |
| H  | -4.55962400 | 3.05762800  | -2.15642300 |
| C  | -4.94297400 | 0.95960000  | -2.50032100 |
| H  | -5.77017200 | 1.14210300  | -3.18038100 |
| C  | -4.55929900 | -0.34817100 | -2.21792800 |
| H  | -5.07360800 | -1.18909100 | -2.67250900 |
| C  | -3.49215900 | -0.55135200 | -1.34432600 |
| C  | -2.94007100 | -1.84152300 | -0.91457600 |
| C  | -3.48334000 | -3.08253800 | -1.22959500 |
| H  | -4.34133500 | -3.14806600 | -1.89192000 |
| C  | -2.93425200 | -4.22685000 | -0.66005700 |
| H  | -3.35295700 | -5.20236000 | -0.89220000 |
| C  | -1.86772000 | -4.10684500 | 0.22243200  |
| H  | -1.42519200 | -4.97364200 | 0.70385600  |
| C  | -1.34609900 | -2.84264900 | 0.47389200  |
| H  | -0.51262500 | -2.67867500 | 1.15724200  |
| Mn | 1.35595200  | -0.10473400 | -0.91587600 |
| O  | 2.13137600  | -0.00198400 | -2.60990800 |
| O  | 0.52402900  | -0.12593800 | 0.77349700  |
| N  | 1.48350000  | -2.16446900 | -1.01050500 |
| C  | 0.70873000  | -2.90956600 | -1.80209000 |
| H  | -0.03428800 | -2.37361400 | -2.38823300 |
| C  | 0.83768600  | -4.29188800 | -1.85746600 |
| H  | 0.18733000  | -4.86528100 | -2.51089000 |
| C  | 1.78866800  | -4.90532300 | -1.05051400 |
| H  | 1.90544600  | -5.98549000 | -1.05837000 |
| C  | 2.60578300  | -4.12461200 | -0.23974000 |
| H  | 3.37273100  | -4.58064800 | 0.37878100  |
| C  | 2.44816600  | -2.74206200 | -0.24859200 |
| C  | 3.29043400  | -1.79158800 | 0.48647700  |
| N  | 3.03098700  | -0.51073500 | 0.18117300  |
| N  | 2.10448600  | 1.78093800  | -0.51106600 |
| C  | 3.15049100  | 1.82787300  | 0.35367100  |
| C  | 3.64171400  | 0.51626400  | 0.79191000  |
| C  | 4.63606700  | 0.27333600  | 1.73761600  |
| C  | 4.95137400  | -1.04811300 | 2.03967200  |
| C  | 4.27618000  | -2.09759400 | 1.42389400  |
| H  | 4.50320700  | -3.12922700 | 1.67473900  |
| H  | 5.72149900  | -1.26306300 | 2.77503000  |
| H  | 5.14486200  | 1.09416900  | 2.23343900  |
| C  | 3.70705800  | 3.04787200  | 0.72347800  |
| H  | 4.53628400  | 3.07631300  | 1.42407300  |
| C  | 3.20744100  | 4.21831900  | 0.16264800  |
| H  | 3.63713300  | 5.17783900  | 0.43713000  |
| C  | 2.17147100  | 4.14603100  | -0.76116700 |

|    |             |             |             |
|----|-------------|-------------|-------------|
| H  | 1.76242400  | 5.03519100  | -1.23093100 |
| C  | 1.63782100  | 2.89990000  | -1.06800700 |
| H  | 0.80946900  | 2.78109400  | -1.76287900 |
| H  | -1.30527600 | -0.61879100 | 2.46242300  |
| H  | -3.30864600 | -0.49268500 | 1.86511800  |
| H  | 3.03203800  | 0.37215100  | -2.50591100 |
| Cl | 5.19473400  | 1.29104500  | -2.46773400 |
| O  | -0.39231700 | -1.72172900 | 3.21418300  |
| O  | -4.27022600 | -0.86081400 | 1.79992100  |
| Cl | -5.21554100 | 0.56825800  | 1.73361800  |
| Cl | 0.77462000  | -0.75911600 | 4.04385700  |

**13**

|    |             |             |             |
|----|-------------|-------------|-------------|
| Mn | 0.82655800  | -0.11545000 | -0.54422500 |
| O  | 1.39305100  | -0.56874300 | -2.28315200 |
| O  | 0.22796200  | 0.29886400  | 1.20485000  |
| N  | 1.21484300  | 1.84867900  | -1.04736500 |
| N  | 2.69983500  | 0.17204000  | 0.20634900  |
| N  | 1.34510600  | -2.00720200 | 0.09870700  |
| C  | 0.43288100  | 2.57728100  | -1.84720000 |
| H  | -0.46273400 | 2.08367100  | -2.21726400 |
| C  | 0.74295500  | 3.89203600  | -2.17114900 |
| H  | 0.08078100  | 4.45559300  | -2.82124000 |
| C  | 1.89370800  | 4.45734700  | -1.63297600 |
| H  | 2.15810300  | 5.48796000  | -1.85366100 |
| C  | 2.71770100  | 3.68909600  | -0.81739800 |
| H  | 3.63395200  | 4.10312200  | -0.40751400 |
| C  | 2.36623600  | 2.36984800  | -0.54844500 |
| C  | 3.18482600  | 1.42267500  | 0.22006500  |
| C  | 4.36672200  | 1.70122300  | 0.90459900  |
| H  | 4.77392500  | 2.70716300  | 0.93033100  |
| C  | 5.01222800  | 0.65407900  | 1.55615500  |
| H  | 5.93727800  | 0.84443600  | 2.09314500  |
| C  | 4.48151300  | -0.63278000 | 1.53842700  |
| H  | 4.98131200  | -1.44508200 | 2.05667500  |
| C  | 3.28584800  | -0.84546300 | 0.85339600  |
| C  | 2.54060000  | -2.10661400 | 0.74236500  |
| C  | 2.98719500  | -3.33546000 | 1.21505900  |
| H  | 3.93802400  | -3.40515700 | 1.73496200  |
| C  | 2.21219200  | -4.47056200 | 0.99579300  |
| H  | 2.55380800  | -5.43774900 | 1.35438000  |
| C  | 1.00944900  | -4.35487500 | 0.31187100  |
| H  | 0.37646800  | -5.21543400 | 0.11723100  |
| C  | 0.60534800  | -3.09600200 | -0.12116700 |
| H  | -0.33783200 | -2.93890000 | -0.63833700 |
| Mn | -1.51747500 | 0.29939200  | 0.86672900  |
| O  | -2.04626200 | 0.61559500  | 2.59559700  |
| O  | -0.90745900 | -0.18509900 | -0.89941400 |
| N  | -2.24237400 | -1.65580600 | 1.08510400  |
| C  | -1.64901200 | -2.59573800 | 1.82186200  |
| H  | -0.76060000 | -2.28675900 | 2.36910600  |
| C  | -2.13230000 | -3.89858100 | 1.87331500  |
| H  | -1.61731900 | -4.63950800 | 2.47709100  |
| C  | -3.26046900 | -4.22059900 | 1.12803200  |
| H  | -3.65583100 | -5.23263800 | 1.13343300  |
| C  | -3.89505600 | -3.23110200 | 0.38360300  |
| H  | -4.79248400 | -3.45324400 | -0.18615500 |
| C  | -3.37197300 | -1.94182700 | 0.38788400  |
| C  | -3.97263600 | -0.79409100 | -0.30288100 |
| N  | -3.35274900 | 0.36817700  | -0.04545900 |
| N  | -1.73132900 | 2.29816300  | 0.43647100  |
| C  | -2.82964100 | 2.64482300  | -0.28404100 |
| C  | -3.70152400 | 1.51966200  | -0.64187100 |

|    |             |             |             |
|----|-------------|-------------|-------------|
| C  | -4.79165600 | 1.55232900  | -1.51021600 |
| C  | -5.47659200 | 0.36626500  | -1.75700500 |
| C  | -5.06990900 | -0.82414000 | -1.16191300 |
| H  | -5.58663000 | -1.75563800 | -1.37232200 |
| H  | -6.32556400 | 0.36663100  | -2.43479700 |
| H  | -5.08732400 | 2.47657500  | -1.99692700 |
| C  | -3.07648000 | 3.97988100  | -0.59185500 |
| H  | -3.95612600 | 4.25099900  | -1.16803000 |
| C  | -2.20166600 | 4.95565900  | -0.12607300 |
| H  | -2.38717300 | 6.00208800  | -0.35273700 |
| C  | -1.10312100 | 4.58248800  | 0.64053000  |
| H  | -0.40387800 | 5.31589100  | 1.03034900  |
| C  | -0.89710100 | 3.23357000  | 0.89897200  |
| H  | -0.06005100 | 2.87195400  | 1.49361100  |
| H  | 0.87445900  | -1.39358500 | -2.58117700 |
| H  | 2.81998400  | -1.17239600 | -2.22422600 |
| O  | -0.07624200 | 1.93565300  | 3.77813100  |
| H  | -1.28834500 | 1.12793000  | 3.04128000  |
| O  | 0.30121900  | -2.78900800 | -3.18469400 |
| O  | 3.75417500  | -1.61483400 | -2.20516500 |
| Cl | 4.81179700  | -0.27914500 | -2.39758100 |
| Cl | -1.41442800 | -2.77189700 | -3.02976100 |
| Cl | 0.87911500  | 0.66711100  | 4.45251200  |

#### 14

|    |             |             |             |
|----|-------------|-------------|-------------|
| Mn | -1.23305100 | 0.02858900  | -0.79959000 |
| O  | -2.12532300 | 0.03989100  | -2.50940900 |
| O  | -0.36652300 | -0.05672200 | 0.83914200  |
| N  | -1.69967200 | -1.98622900 | -0.73991800 |
| N  | -2.94043500 | -0.00600200 | 0.32597800  |
| N  | -1.68348800 | 2.02351900  | -0.60799800 |
| C  | -1.07832900 | -2.91580700 | -1.46775400 |
| H  | -0.27764300 | -2.56452900 | -2.11460600 |
| C  | -1.42977400 | -4.25864400 | -1.39073200 |
| H  | -0.89766100 | -4.98694500 | -1.99487700 |
| C  | -2.44842200 | -4.63291300 | -0.52318100 |
| H  | -2.73912800 | -5.67568100 | -0.43072100 |
| C  | -3.10901100 | -3.65889400 | 0.21917500  |
| H  | -3.92476800 | -3.92494400 | 0.88468200  |
| C  | -2.72707700 | -2.32898200 | 0.08298900  |
| C  | -3.39198900 | -1.19745100 | 0.74106400  |
| C  | -4.40892000 | -1.25916900 | 1.69228900  |
| H  | -4.79373300 | -2.21289000 | 2.03948000  |
| C  | -4.91705400 | -0.06215300 | 2.18948000  |
| H  | -5.71052300 | -0.08358000 | 2.93121700  |
| C  | -4.41484300 | 1.16281300  | 1.75708200  |
| H  | -4.80343700 | 2.09455200  | 2.15608600  |
| C  | -3.39198000 | 1.15893800  | 0.81033100  |
| C  | -2.71373700 | 2.32359100  | 0.22899400  |
| C  | -3.08042000 | 3.64661000  | 0.44877400  |
| H  | -3.89744300 | 3.87674200  | 1.12601100  |
| C  | -2.40670000 | 4.65908800  | -0.22626900 |
| H  | -2.68587100 | 5.69678100  | -0.06568000 |
| C  | -1.38859000 | 4.33049800  | -1.11368100 |
| H  | -0.84541200 | 5.09032500  | -1.66690600 |
| C  | -1.04854600 | 2.99262000  | -1.27242800 |
| H  | -0.24289500 | 2.67423400  | -1.93000200 |
| Mn | 1.31380600  | 0.01435400  | 0.23664900  |
| O  | 2.04099600  | -0.14474900 | 1.94043000  |
| O  | 0.42034000  | 0.08180200  | -1.45009500 |
| N  | 1.62624700  | 2.04694400  | 0.30622300  |
| C  | 0.91847200  | 2.87075800  | 1.08305300  |
| H  | 0.11207300  | 2.41475900  | 1.65342500  |

|    |             |             |             |
|----|-------------|-------------|-------------|
| C  | 1.19420800  | 4.23062200  | 1.14533500  |
| H  | 0.59442100  | 4.87056700  | 1.78511200  |
| C  | 2.22846700  | 4.73713600  | 0.36674100  |
| H  | 2.46228500  | 5.79805500  | 0.38230500  |
| C  | 2.97934500  | 3.87247500  | -0.42248200 |
| H  | 3.81116800  | 4.24143000  | -1.01484800 |
| C  | 2.67237100  | 2.51525500  | -0.42334000 |
| C  | 3.43537200  | 1.47672700  | -1.12613200 |
| N  | 3.02366400  | 0.23307100  | -0.83532800 |
| N  | 1.85910200  | -1.93875300 | -0.12638300 |
| C  | 2.93340900  | -2.11001600 | -0.94217700 |
| C  | 3.56943100  | -0.86282500 | -1.38385200 |
| C  | 4.63902900  | -0.73487700 | -2.26844300 |
| C  | 5.09715500  | 0.54450100  | -2.57196100 |
| C  | 4.49716800  | 1.66690600  | -2.00970900 |
| H  | 4.84488600  | 2.66608400  | -2.25372300 |
| H  | 5.92759000  | 0.66782900  | -3.26134000 |
| H  | 5.09894000  | -1.61090400 | -2.71497000 |
| C  | 3.37787000  | -3.38767700 | -1.26482500 |
| H  | 4.22719600  | -3.51641000 | -1.92887900 |
| C  | 2.73925200  | -4.48905100 | -0.70411700 |
| H  | 3.08063500  | -5.49289600 | -0.94151100 |
| C  | 1.67794900  | -4.29235400 | 0.17059800  |
| H  | 1.16236200  | -5.12458900 | 0.63973900  |
| C  | 1.26000100  | -2.99210500 | 0.43133000  |
| H  | 0.42222700  | -2.77552900 | 1.09072300  |
| H  | -1.70758600 | 0.76890900  | -2.99988700 |
| H  | -3.58293800 | 0.64677400  | -2.30644400 |
| H  | 2.97115200  | -0.56846500 | 1.85798900  |
| O  | 0.38411700  | -1.65904000 | 3.30427200  |
| H  | 1.02850800  | -1.07270200 | 2.76795400  |
| Cl | -0.61559700 | -0.51182300 | 4.09657800  |
| O  | 4.42433800  | -1.17800700 | 1.68645400  |
| O  | -4.50746000 | 1.07691100  | -2.21059000 |
| Cl | -5.51566900 | -0.26113000 | -1.84805400 |
| Cl | 5.38422400  | 0.24984600  | 1.62127900  |

## 16

|    |             |             |             |
|----|-------------|-------------|-------------|
| Mn | -1.55410600 | 0.16649700  | -0.91954200 |
| O  | -0.73950500 | -0.26513500 | 0.73032900  |
| N  | -2.26089100 | -1.92785100 | -1.35178500 |
| N  | -3.50233400 | 0.04974900  | -0.19686700 |
| N  | -2.29787800 | 2.20748800  | -1.00530700 |
| C  | -1.53787900 | -2.88556700 | -1.93824200 |
| H  | -0.72735300 | -2.54595900 | -2.58071900 |
| C  | -1.78936100 | -4.24071100 | -1.75006100 |
| H  | -1.17601100 | -4.98118800 | -2.25517900 |
| C  | -2.81996200 | -4.60988900 | -0.89407400 |
| H  | -3.03500100 | -5.65815400 | -0.70404300 |
| C  | -3.58060400 | -3.62066600 | -0.27906900 |
| H  | -4.38905700 | -3.88670700 | 0.39574200  |
| C  | -3.28422700 | -2.28416700 | -0.53429600 |
| C  | -4.04962800 | -1.15666700 | 0.02507600  |
| C  | -5.27182000 | -1.25767800 | 0.69019700  |
| H  | -5.72936600 | -2.22537500 | 0.87090000  |
| C  | -5.90647200 | -0.08875800 | 1.09710800  |
| H  | -6.86059900 | -0.14510600 | 1.61380800  |
| C  | -5.34141600 | 1.15245000  | 0.82296200  |
| H  | -5.84966900 | 2.06751400  | 1.11085900  |
| C  | -4.11606000 | 1.19226300  | 0.15881700  |
| C  | -3.40601400 | 2.41608600  | -0.24889300 |
| C  | -3.82146300 | 3.70366600  | 0.08109800  |
| H  | -4.70084900 | 3.85467100  | 0.70019600  |

|    |             |             |             |
|----|-------------|-------------|-------------|
| C  | -3.09586700 | 4.79106500  | -0.39388800 |
| H  | -3.40834800 | 5.80248500  | -0.14767500 |
| C  | -1.97014900 | 4.56923600  | -1.17927500 |
| H  | -1.37513900 | 5.39061900  | -1.56731200 |
| C  | -1.59817400 | 3.25747100  | -1.44727200 |
| H  | -0.71125700 | 3.02642900  | -2.03439500 |
| Mn | 0.91642200  | 0.06221100  | 0.18956100  |
| O  | 1.63387800  | -0.23936900 | 1.90828300  |
| O  | 0.12349400  | 0.35215700  | -1.51391700 |
| N  | 1.00709200  | 2.09427100  | 0.54668800  |
| C  | 0.09799700  | 2.76938900  | 1.25352900  |
| H  | -0.72169000 | 2.18165000  | 1.66090100  |
| C  | 0.19729900  | 4.14121400  | 1.45208700  |
| H  | -0.56208900 | 4.65602900  | 2.03268900  |
| C  | 1.26716900  | 4.82148500  | 0.88181000  |
| H  | 1.36903900  | 5.89585400  | 1.00817600  |
| C  | 2.21549000  | 4.11530200  | 0.14961700  |
| H  | 3.06553800  | 4.62452800  | -0.29465000 |
| C  | 2.07063600  | 2.73941300  | -0.00050500 |
| C  | 3.01728200  | 1.86929100  | -0.70881300 |
| N  | 2.68947800  | 0.56948200  | -0.65217000 |
| N  | 1.65579600  | -1.77302200 | -0.41553900 |
| C  | 2.85112300  | -1.73818800 | -1.06298600 |
| C  | 3.41654500  | -0.39330500 | -1.23866500 |
| C  | 4.57865300  | -0.05684800 | -1.93157600 |
| C  | 4.94237000  | 1.28550800  | -2.00136400 |
| C  | 4.16488300  | 2.26686300  | -1.39391600 |
| H  | 4.44542400  | 3.31388500  | -1.45170400 |
| H  | 5.84179100  | 1.56957000  | -2.54055700 |
| H  | 5.18024200  | -0.82149700 | -2.41314200 |
| C  | 3.45724100  | -2.91430200 | -1.49221900 |
| H  | 4.41317400  | -2.87697300 | -2.00604600 |
| C  | 2.83306800  | -4.13100900 | -1.23720600 |
| H  | 3.29827400  | -5.05802400 | -1.56115100 |
| C  | 1.61807000  | -4.14886900 | -0.56303800 |
| H  | 1.09980200  | -5.07729600 | -0.34269000 |
| C  | 1.05796700  | -2.93972500 | -0.16693500 |
| H  | 0.10752100  | -2.88873300 | 0.35932700  |
| H  | 2.61496800  | -0.49179100 | 1.82122200  |
| H  | 1.15923600  | -1.62542200 | 2.49571000  |
| O  | 1.04916700  | -2.55948600 | 2.91437600  |
| Cl | -0.64763400 | -2.78746900 | 3.00853800  |
| O  | 4.14225200  | -1.03951100 | 1.76382100  |
| Cl | 5.04176500  | 0.42894500  | 1.83151800  |

**17**

|    |             |             |             |
|----|-------------|-------------|-------------|
| Mn | -1.37634200 | 0.28113800  | -1.01103400 |
| O  | -0.56342900 | 0.13686200  | 0.66917600  |
| N  | -2.02398000 | -1.94728300 | -1.17241900 |
| N  | -3.21277900 | -0.10069400 | 0.28067400  |
| N  | -2.40689300 | 2.29360300  | -0.47602100 |
| C  | -1.43521400 | -2.81235600 | -2.00031300 |
| H  | -0.76760800 | -2.37949000 | -2.74573400 |
| C  | -1.63865400 | -4.18587000 | -1.92449900 |
| H  | -1.13904000 | -4.85275300 | -2.62132000 |
| C  | -2.47675900 | -4.67016300 | -0.92550400 |
| H  | -2.65322500 | -5.73765800 | -0.81965900 |
| C  | -3.09521400 | -3.77397300 | -0.06074700 |
| H  | -3.76040500 | -4.13706000 | 0.71730400  |
| C  | -2.85740900 | -2.40676400 | -0.21820100 |
| C  | -3.49199600 | -1.36869800 | 0.62094200  |
| C  | -4.32360100 | -1.65832900 | 1.70608800  |
| H  | -4.54848300 | -2.68476200 | 1.97924900  |



|    |             |             |             |
|----|-------------|-------------|-------------|
| C  | -4.84726600 | -0.60415100 | 2.44312300  |
| H  | -5.49003600 | -0.80221300 | 3.29670700  |
| C  | -4.53834500 | 0.70422500  | 2.09293700  |
| H  | -4.93135900 | 1.53339600  | 2.67278400  |
| C  | -3.70336000 | 0.92472800  | 0.99495300  |
| C  | -3.29168300 | 2.27003200  | 0.54086500  |
| C  | -3.77800400 | 3.45115400  | 1.10407300  |
| H  | -4.49309000 | 3.42523700  | 1.92082900  |
| C  | -3.34189600 | 4.67027900  | 0.59720100  |
| H  | -3.70988800 | 5.59935800  | 1.02523100  |
| C  | -2.44036300 | 4.68558300  | -0.46168000 |
| H  | -2.07739300 | 5.61676300  | -0.88719900 |
| C  | -1.99739000 | 3.46617700  | -0.96273700 |
| H  | -1.27790100 | 3.41626500  | -1.78056200 |
| Mn | 1.11921300  | 0.18490100  | 0.10752200  |
| O  | 1.73677400  | -0.00095100 | 1.92124600  |
| O  | 0.39292100  | 0.32883100  | -1.58452600 |
| N  | 1.48600100  | 2.22725800  | 0.22101900  |
| C  | 0.66346800  | 3.10239900  | 0.80426500  |
| H  | -0.25259400 | 2.69074200  | 1.22204800  |
| C  | 0.96442900  | 4.45747500  | 0.87646700  |
| H  | 0.26810900  | 5.13674700  | 1.35883800  |
| C  | 2.15829400  | 4.90586400  | 0.32436100  |
| H  | 2.42332500  | 5.95893600  | 0.36143300  |
| C  | 3.02253200  | 3.99142100  | -0.26790900 |
| H  | 3.96969000  | 4.31458200  | -0.68971400 |
| C  | 2.66857000  | 2.64656800  | -0.30224600 |
| C  | 3.51456900  | 1.57781600  | -0.84625400 |
| N  | 3.00029600  | 0.35243800  | -0.67013800 |
| N  | 1.64960500  | -1.79185600 | -0.21675300 |
| C  | 2.87193700  | -1.98905400 | -0.78035900 |
| C  | 3.62188600  | -0.76242500 | -1.07889300 |
| C  | 4.86162700  | -0.67499000 | -1.71071800 |
| C  | 5.41485300  | 0.58765500  | -1.90740800 |
| C  | 4.74703300  | 1.73141400  | -1.48000700 |
| H  | 5.17720800  | 2.71668400  | -1.63097200 |
| H  | 6.37805100  | 0.68094800  | -2.40132200 |
| H  | 5.38037500  | -1.56736700 | -2.04731000 |
| C  | 3.34776700  | -3.27475900 | -1.01456600 |
| H  | 4.32551300  | -3.41822500 | -1.46484700 |
| C  | 2.56671900  | -4.36491000 | -0.64624800 |
| H  | 2.92890600  | -5.37518000 | -0.81634700 |
| C  | 1.32688500  | -4.14761200 | -0.05754300 |
| H  | 0.68595100  | -4.96996900 | 0.24619700  |
| C  | 0.90074600  | -2.83887000 | 0.13826600  |
| H  | -0.06441800 | -2.60825000 | 0.58389700  |
| H  | 2.65918000  | -0.41101000 | 1.92052700  |
| H  | 0.97121400  | -1.16935700 | 2.62839500  |
| O  | 0.68038600  | -2.00418900 | 3.16830900  |
| Cl | -1.03593000 | -2.01080200 | 3.10914100  |
| O  | 4.13342400  | -1.17672100 | 2.01082700  |
| O  | -1.93104000 | 0.52405100  | -2.88967600 |
| Cl | -3.64130500 | 0.41833900  | -3.05274100 |
| Cl | 5.20800700  | 0.17105800  | 1.99334600  |

18

|    |             |             |             |
|----|-------------|-------------|-------------|
| Mn | -0.95816600 | 0.30173500  | -0.96122100 |
| O  | -0.31684500 | 0.11368600  | 0.80217600  |
| N  | -1.49791200 | -1.95702200 | -1.30730800 |
| N  | -2.92687200 | -0.21493700 | 0.05242400  |
| N  | -2.12066000 | 2.23251800  | -0.49363600 |
| C  | -0.78171900 | -2.76569600 | -2.09027600 |
| H  | -0.04796000 | -2.27947700 | -2.73329300 |

|    |             |             |             |
|----|-------------|-------------|-------------|
| C  | -0.93948500 | -4.14738400 | -2.09141500 |
| H  | -0.33441900 | -4.76696300 | -2.74711300 |
| C  | -1.87416100 | -4.70139400 | -1.22299200 |
| H  | -2.02313900 | -5.77750000 | -1.18257400 |
| C  | -2.62449500 | -3.86425900 | -0.40463600 |
| H  | -3.36686200 | -4.28257900 | 0.26868800  |
| C  | -2.41833400 | -2.48509100 | -0.47654500 |
| C  | -3.18410100 | -1.50504900 | 0.32107500  |
| C  | -4.11833400 | -1.86634800 | 1.29510900  |
| H  | -4.31887000 | -2.90999000 | 1.51676400  |
| C  | -4.77843900 | -0.86181000 | 1.99093200  |
| H  | -5.50361700 | -1.11748800 | 2.75885000  |
| C  | -4.50426400 | 0.46997900  | 1.70698300  |
| H  | -5.00617800 | 1.26332800  | 2.25197100  |
| C  | -3.55673800 | 0.76267000  | 0.72367900  |
| C  | -3.16825000 | 2.13810400  | 0.34864600  |
| C  | -3.83356400 | 3.27667100  | 0.80633400  |
| H  | -4.68059400 | 3.19171800  | 1.48073200  |
| C  | -3.40587900 | 4.52700400  | 0.37443100  |
| H  | -3.91252900 | 5.42434200  | 0.72054200  |
| C  | -2.33283000 | 4.61429100  | -0.50638400 |
| H  | -1.97084200 | 5.57159500  | -0.87018900 |
| C  | -1.71998200 | 3.43413000  | -0.91247200 |
| H  | -0.86756500 | 3.44130300  | -1.59214400 |
| Mn | 1.41272900  | 0.20672200  | 0.40619000  |
| O  | 1.86418600  | 0.02797100  | 2.30729400  |
| O  | 0.87125700  | 0.36503000  | -1.33157600 |
| N  | 1.75380800  | 2.23787100  | 0.54083100  |
| C  | 0.84349400  | 3.11550800  | 0.96867600  |
| H  | -0.11530400 | 2.69964200  | 1.26827500  |
| C  | 1.11044800  | 4.47809500  | 1.03045000  |
| H  | 0.34150900  | 5.15983800  | 1.38101200  |
| C  | 2.36449600  | 4.92965000  | 0.63826900  |
| H  | 2.60596600  | 5.98847800  | 0.67057900  |
| C  | 3.31971500  | 4.01184300  | 0.21411400  |
| H  | 4.31175500  | 4.34141500  | -0.07933500 |
| C  | 2.99515300  | 2.65959900  | 0.17880100  |
| C  | 3.92441700  | 1.58629700  | -0.19603400 |
| N  | 3.38314900  | 0.36215500  | -0.10466300 |
| N  | 1.97628800  | -1.78065500 | 0.15177900  |
| C  | 3.27293600  | -1.98167800 | -0.20837600 |
| C  | 4.06438800  | -0.75829100 | -0.38458900 |
| C  | 5.39608300  | -0.67932700 | -0.78914300 |
| C  | 5.97980400  | 0.57984200  | -0.89345400 |
| C  | 5.25214900  | 1.72919000  | -0.59727600 |
| H  | 5.70966400  | 2.71064500  | -0.67408800 |
| H  | 7.01627800  | 0.66720100  | -1.20691100 |
| H  | 5.96307100  | -1.57666700 | -1.01672100 |
| C  | 3.77768900  | -3.26854400 | -0.35883400 |
| H  | 4.81347600  | -3.41448000 | -0.65030400 |
| C  | 2.94599500  | -4.35686200 | -0.11565900 |
| H  | 3.32911000  | -5.36799300 | -0.22261100 |
| C  | 1.63041400  | -4.13575300 | 0.27128300  |
| H  | 0.94982400  | -4.95619000 | 0.47823700  |
| C  | 1.18065000  | -2.82514200 | 0.39116600  |
| H  | 0.15955300  | -2.59158600 | 0.68313800  |
| H  | 2.78004700  | -0.29433100 | 2.34157300  |
| H  | 1.03774300  | -1.20769600 | 2.91978400  |
| O  | 0.70267500  | -2.04987000 | 3.40053600  |
| Cl | -0.99717300 | -2.06160400 | 3.16361600  |
| O  | -1.23306200 | 0.64727200  | -2.87231600 |
| Cl | -2.89800300 | 0.63326900  | -3.29803700 |

## 19

|    |             |             |             |
|----|-------------|-------------|-------------|
| Mn | -0.99659800 | -0.02178100 | -0.60857900 |
| O  | -0.20736300 | -0.04804300 | 1.12771900  |
| N  | -1.55913900 | -2.23698200 | -0.63225700 |
| N  | -2.92320200 | -0.25255300 | 0.42532800  |
| N  | -1.93008900 | 2.04822600  | -0.39373400 |
| C  | -0.83463600 | -3.17859000 | -1.23915900 |
| H  | -0.04925300 | -2.82120600 | -1.90515000 |
| C  | -1.05060500 | -4.53738700 | -1.03666600 |
| H  | -0.43727500 | -5.27086400 | -1.55202500 |
| C  | -2.05205400 | -4.91846900 | -0.15025600 |
| H  | -2.24528300 | -5.96953000 | 0.04888300  |
| C  | -2.81311600 | -3.94088900 | 0.48101700  |
| H  | -3.60195200 | -4.22379300 | 1.17134400  |
| C  | -2.54684000 | -2.59804500 | 0.21178400  |
| C  | -3.31681600 | -1.48205400 | 0.79691500  |
| C  | -4.39912100 | -1.65448000 | 1.66194400  |
| H  | -4.72595500 | -2.64740100 | 1.95466400  |
| C  | -5.05500400 | -0.52855800 | 2.14314000  |
| H  | -5.89491500 | -0.63781200 | 2.82389100  |
| C  | -4.63917100 | 0.73698600  | 1.74988600  |
| H  | -5.14375400 | 1.62235900  | 2.12333600  |
| C  | -3.55758600 | 0.84366000  | 0.87362200  |
| C  | -3.04637500 | 2.12935700  | 0.35678200  |
| C  | -3.67986000 | 3.35281400  | 0.57951300  |
| H  | -4.58251000 | 3.41017800  | 1.18050800  |
| C  | -3.15097500 | 4.50066700  | 0.00037600  |
| H  | -3.63298600 | 5.46165900  | 0.16067600  |
| C  | -2.01273400 | 4.40308000  | -0.79290000 |
| H  | -1.57442400 | 5.27480100  | -1.27012600 |
| C  | -1.43545900 | 3.14963800  | -0.96130000 |
| H  | -0.53771400 | 3.01317900  | -1.56438500 |
| Mn | 1.45959200  | 0.09457500  | 0.57180400  |
| O  | 0.87046000  | 0.11310500  | -1.05790800 |
| N  | 1.79546500  | 2.11614500  | 0.68201400  |
| C  | 0.88806800  | 3.00494100  | 1.09704000  |
| H  | -0.05744200 | 2.59579500  | 1.44170600  |
| C  | 1.14163800  | 4.37129300  | 1.08593900  |
| H  | 0.37652000  | 5.06006200  | 1.43043100  |
| C  | 2.37205100  | 4.81708500  | 0.62164400  |
| H  | 2.59901000  | 5.87902600  | 0.58858300  |
| C  | 3.32543800  | 3.89037200  | 0.21078300  |
| H  | 4.30236000  | 4.21725400  | -0.13220300 |
| C  | 3.02143900  | 2.53540000  | 0.25856200  |
| C  | 3.95936500  | 1.45418800  | -0.06442400 |
| N  | 3.43909500  | 0.23157000  | 0.13177900  |
| N  | 2.10447600  | -1.89472200 | 0.66680200  |
| C  | 3.39255800  | -2.11163500 | 0.28243400  |
| C  | 4.14709900  | -0.89617300 | -0.04286400 |
| C  | 5.47481900  | -0.82455400 | -0.45904900 |
| C  | 6.02941200  | 0.43136800  | -0.68749400 |
| C  | 5.28027200  | 1.58747700  | -0.48823500 |
| H  | 5.71685100  | 2.56760700  | -0.65215700 |
| H  | 7.06172800  | 0.51041900  | -1.01619000 |
| H  | 6.06415500  | -1.72504700 | -0.59997400 |
| C  | 3.91599100  | -3.39861700 | 0.25604400  |
| H  | 4.94319200  | -3.56213900 | -0.05598300 |
| C  | 3.11350900  | -4.46654100 | 0.64685800  |
| H  | 3.51209900  | -5.47716100 | 0.63406100  |
| C  | 1.80894300  | -4.22656000 | 1.05912100  |
| H  | 1.15340100  | -5.03079500 | 1.37895600  |
| C  | 1.33582800  | -2.91954000 | 1.04813500  |
| H  | 0.32077500  | -2.67056300 | 1.34802700  |

|    |             |            |             |
|----|-------------|------------|-------------|
| O  | -1.29812400 | 0.08563100 | -2.52707100 |
| Cl | -2.95552800 | 0.00937500 | -2.94788800 |

**20**

|    |             |             |             |
|----|-------------|-------------|-------------|
| Mn | -1.18795000 | 0.01975400  | -0.69454100 |
| O  | -0.38298800 | 0.00426800  | 1.01796400  |
| N  | -1.73133100 | -2.24252900 | -0.74265300 |
| N  | -3.10316400 | -0.29021800 | 0.39546500  |
| N  | -2.18860700 | 2.07689800  | -0.37621000 |
| C  | -1.00868900 | -3.16759200 | -1.37720100 |
| H  | -0.26358700 | -2.79236400 | -2.07905800 |
| C  | -1.17616300 | -4.53158200 | -1.16329000 |
| H  | -0.56530100 | -5.24896300 | -1.70390600 |
| C  | -2.12384300 | -4.93741700 | -0.23016500 |
| H  | -2.27681800 | -5.99266500 | -0.01814000 |
| C  | -2.88103500 | -3.97869700 | 0.43367200  |
| H  | -3.62565300 | -4.28287700 | 1.16293100  |
| C  | -2.66779500 | -2.62904000 | 0.14705200  |
| C  | -3.44380000 | -1.53583900 | 0.76892500  |
| C  | -4.48178100 | -1.75338800 | 1.67774200  |
| H  | -4.76475400 | -2.75933100 | 1.97121900  |
| C  | -5.15141200 | -0.65615800 | 2.20255100  |
| H  | -5.95683200 | -0.80055600 | 2.91762800  |
| C  | -4.79048300 | 0.62595700  | 1.81012000  |
| H  | -5.30350500 | 1.48962700  | 2.22118900  |
| C  | -3.75094600 | 0.77877600  | 0.88988100  |
| C  | -3.29582600 | 2.09447800  | 0.39218100  |
| C  | -3.96749600 | 3.28767400  | 0.66420800  |
| H  | -4.86527000 | 3.29386200  | 1.27497000  |
| C  | -3.48191900 | 4.47344000  | 0.12513300  |
| H  | -3.99468300 | 5.41088400  | 0.32500400  |
| C  | -2.34596400 | 4.44392300  | -0.67657900 |
| H  | -1.93877800 | 5.34736600  | -1.12144500 |
| C  | -1.73373500 | 3.21581800  | -0.90100500 |
| H  | -0.84131400 | 3.13125000  | -1.52150700 |
| Mn | 1.30323400  | 0.10517900  | 0.44904000  |
| O  | 0.59299500  | 0.10345900  | -1.22366800 |
| N  | 1.68616600  | 2.13359000  | 0.38963700  |
| C  | 0.87169300  | 3.05930700  | 0.90126400  |
| H  | -0.02657300 | 2.68749800  | 1.38793400  |
| C  | 1.15602500  | 4.41695500  | 0.80905900  |
| H  | 0.46432600  | 5.13991800  | 1.23055500  |
| C  | 2.32454000  | 4.81098800  | 0.16845400  |
| H  | 2.57500400  | 5.86414400  | 0.07519700  |
| C  | 3.18300100  | 3.84446600  | -0.34570400 |
| H  | 4.11247100  | 4.12895600  | -0.82980600 |
| C  | 2.84535300  | 2.50092500  | -0.21876900 |
| C  | 3.67729500  | 1.37962900  | -0.67362700 |
| N  | 3.16990200  | 0.18007900  | -0.35323700 |
| N  | 1.85157900  | -1.88659400 | 0.39975100  |
| C  | 3.05981800  | -2.15536900 | -0.16361900 |
| C  | 3.78646400  | -0.97451700 | -0.64540600 |
| C  | 5.00439600  | -0.95823000 | -1.32413200 |
| C  | 5.54603800  | 0.27438600  | -1.67769200 |
| C  | 4.89121300  | 1.45945200  | -1.35437300 |
| H  | 5.31506600  | 2.42057300  | -1.62837500 |
| H  | 6.49194800  | 0.31232800  | -2.21062400 |
| H  | 5.51794100  | -1.88167700 | -1.57266500 |
| C  | 3.54393200  | -3.45845900 | -0.21498600 |
| H  | 4.51009100  | -3.66261800 | -0.66664400 |
| C  | 2.78472500  | -4.48625300 | 0.33431600  |
| H  | 3.15316600  | -5.50800400 | 0.30638600  |
| C  | 1.56266100  | -4.19134100 | 0.92600500  |

|    |             |             |             |
|----|-------------|-------------|-------------|
| H  | 0.94325100  | -4.96370300 | 1.37185600  |
| C  | 1.12677200  | -2.87139200 | 0.93610300  |
| H  | 0.17740400  | -2.57872900 | 1.37937300  |
| O  | -1.57936800 | 0.15368600  | -2.62979700 |
| Cl | -3.26244200 | 0.11246400  | -2.98666700 |
| O  | 1.76626000  | 0.11352600  | 2.37092700  |
| Cl | 3.43509100  | 0.18390400  | 2.76737600  |

**TS20-21**

|    |             |             |             |
|----|-------------|-------------|-------------|
| Mn | -1.27920100 | 0.03949800  | -0.59621300 |
| O  | -0.49054700 | 0.04580800  | 1.16595100  |
| N  | -1.87067100 | -2.06860800 | -0.48713800 |
| N  | -3.16027500 | 0.03629300  | 0.34631800  |
| N  | -1.91551500 | 2.11082300  | -0.61631100 |
| C  | -1.16132500 | -3.08692300 | -0.97856900 |
| H  | -0.30159400 | -2.82199800 | -1.59158900 |
| C  | -1.48315400 | -4.41464600 | -0.71872700 |
| H  | -0.87582600 | -5.21023700 | -1.14020500 |
| C  | -2.57202300 | -4.68414400 | 0.10166100  |
| H  | -2.84502500 | -5.70835000 | 0.34178600  |
| C  | -3.31482100 | -3.62694000 | 0.61531900  |
| H  | -4.17241200 | -3.81356800 | 1.25509200  |
| C  | -2.94713000 | -2.32156200 | 0.29584800  |
| C  | -3.68504000 | -1.13146600 | 0.74782200  |
| C  | -4.84965700 | -1.15175300 | 1.51667400  |
| H  | -5.28501600 | -2.09166400 | 1.84123400  |
| C  | -5.44222000 | 0.05854200  | 1.85719000  |
| H  | -6.34881100 | 0.06734000  | 2.45590900  |
| C  | -4.88193700 | 1.25900500  | 1.43302800  |
| H  | -5.34427600 | 2.20585900  | 1.69377100  |
| C  | -3.71785900 | 1.21588400  | 0.66601600  |
| C  | -3.01481300 | 2.38964400  | 0.12372800  |
| C  | -3.43216300 | 3.70679000  | 0.30221300  |
| H  | -4.30776100 | 3.92909600  | 0.90441500  |
| C  | -2.72017800 | 4.73237100  | -0.31057700 |
| H  | -3.03764500 | 5.76382500  | -0.18341600 |
| C  | -1.61102100 | 4.42495700  | -1.09063100 |
| H  | -1.03304200 | 5.19645100  | -1.59043200 |
| C  | -1.23759900 | 3.09217900  | -1.21387400 |
| H  | -0.37135900 | 2.78921000  | -1.79966100 |
| Mn | 1.18303700  | 0.05402900  | 0.59732000  |
| O  | 1.66736200  | 0.07957100  | 2.49716200  |
| O  | 0.45574900  | 0.02128100  | -1.10227800 |
| N  | 1.61637800  | 2.06929100  | 0.50744100  |
| C  | 0.86416100  | 3.01571100  | 1.07408800  |
| H  | -0.01429000 | 2.66924400  | 1.61422900  |
| C  | 1.18149700  | 4.36467500  | 0.96537500  |
| H  | 0.54266900  | 5.10564500  | 1.43614300  |
| C  | 2.30605500  | 4.72822000  | 0.23433900  |
| H  | 2.57496300  | 5.77454500  | 0.11831500  |
| C  | 3.09710000  | 3.73949400  | -0.34234500 |
| H  | 3.99289900  | 3.99899300  | -0.89860900 |
| C  | 2.73927700  | 2.40489300  | -0.18202600 |
| C  | 3.51916200  | 1.26110200  | -0.66946500 |
| N  | 3.01725900  | 0.07873900  | -0.28320000 |
| N  | 1.69917500  | -1.94676100 | 0.57160500  |
| C  | 2.85887600  | -2.25093200 | -0.06926600 |
| C  | 3.57895800  | -1.09365900 | -0.61221700 |
| C  | 4.74393000  | -1.11547500 | -1.37746000 |
| C  | 5.28676100  | 0.09940900  | -1.78685100 |
| C  | 4.68136400  | 1.30362400  | -1.43814500 |
| H  | 5.10248800  | 2.25034100  | -1.76153400 |
| H  | 6.19158600  | 0.10806400  | -2.38802300 |

|    |             |             |             |
|----|-------------|-------------|-------------|
| H  | 5.21375900  | -2.05449100 | -1.65229000 |
| C  | 3.31107200  | -3.56487800 | -0.12939400 |
| H  | 4.23605000  | -3.79793100 | -0.64850300 |
| C  | 2.57838100  | -4.56341200 | 0.50417400  |
| H  | 2.92349200  | -5.59316400 | 0.47246600  |
| C  | 1.41599700  | -4.22872700 | 1.18809900  |
| H  | 0.82190500  | -4.97666900 | 1.70423700  |
| C  | 1.00383800  | -2.90121100 | 1.19378400  |
| H  | 0.09414300  | -2.58065400 | 1.69712700  |
| O  | -2.03599600 | 0.24468900  | -2.33063700 |
| Cl | -1.60335700 | -1.14247800 | -3.77135300 |
| Cl | 3.34437400  | 0.04824600  | 2.86431800  |

**21**

|    |             |             |             |
|----|-------------|-------------|-------------|
| Mn | -1.37597600 | -0.00002200 | -0.78577600 |
| O  | -0.66676600 | -0.00004100 | 0.95210900  |
| N  | -1.86335200 | -1.98920500 | -0.80163600 |
| N  | -3.21620600 | 0.00004200  | 0.05951200  |
| N  | -1.86336200 | 1.98917200  | -0.80185900 |
| C  | -1.12806600 | -2.92587900 | -1.40778700 |
| H  | -0.24429500 | -2.57524500 | -1.93499100 |
| C  | -1.47307100 | -4.27028600 | -1.34623400 |
| H  | -0.85174900 | -5.00606200 | -1.84710100 |
| C  | -2.60210800 | -4.63697000 | -0.62335100 |
| H  | -2.89153700 | -5.68123900 | -0.54585400 |
| C  | -3.37350900 | -3.65595100 | -0.00709100 |
| H  | -4.27139600 | -3.91838900 | 0.54420000  |
| C  | -2.99494600 | -2.32337600 | -0.12167200 |
| C  | -3.75368000 | -1.18077300 | 0.39701700  |
| C  | -4.93459500 | -1.21177300 | 1.13759600  |
| H  | -5.39111400 | -2.15502000 | 1.42020300  |
| C  | -5.51398200 | 0.00011700  | 1.50525100  |
| H  | -6.43307100 | 0.00015200  | 2.08418300  |
| C  | -4.93458800 | 1.21196800  | 1.13748100  |
| H  | -5.39112800 | 2.15523800  | 1.41997200  |
| C  | -3.75366700 | 1.18089500  | 0.39691400  |
| C  | -2.99490600 | 2.32344100  | -0.12186100 |
| C  | -3.37337100 | 3.65604500  | -0.00730200 |
| H  | -4.27121600 | 3.91856600  | 0.54401600  |
| C  | -2.60190000 | 4.63699400  | -0.62358600 |
| H  | -2.89123500 | 5.68129000  | -0.54608200 |
| C  | -1.47291000 | 4.27021400  | -1.34649500 |
| H  | -0.85154900 | 5.00593700  | -1.84739300 |
| C  | -1.12802000 | 2.92577900  | -1.40804900 |
| H  | -0.24431200 | 2.57506800  | -1.93530500 |
| Mn | 1.05324500  | -0.00008200 | 0.49044400  |
| O  | 1.44486100  | -0.00003600 | 2.39733700  |
| O  | 0.36863200  | -0.00021900 | -1.23318600 |
| N  | 1.52898800  | 2.00280200  | 0.45002400  |
| C  | 0.77209600  | 2.94681600  | 1.01440600  |
| H  | -0.13826500 | 2.60499300  | 1.50163800  |
| C  | 1.12765200  | 4.28952000  | 0.96641800  |
| H  | 0.48530800  | 5.03063500  | 1.43194000  |
| C  | 2.29605100  | 4.64691200  | 0.30419200  |
| H  | 2.59703600  | 5.68884300  | 0.24021900  |
| C  | 3.09022900  | 3.65835500  | -0.26831800 |
| H  | 4.01939700  | 3.91252000  | -0.76942700 |
| C  | 2.69192000  | 2.32907800  | -0.17281600 |
| C  | 3.46334100  | 1.17968100  | -0.65668100 |
| N  | 2.91289000  | -0.00006400 | -0.33084500 |
| N  | 1.52904600  | -2.00294200 | 0.45005300  |
| C  | 2.69193500  | -2.32921400 | -0.17287100 |
| C  | 3.46334000  | -1.17980000 | -0.65672700 |

|    |             |             |             |
|----|-------------|-------------|-------------|
| C  | 4.66410500  | -1.21059700 | -1.36384700 |
| C  | 5.25599200  | -0.00003800 | -1.71359400 |
| C  | 4.66411000  | 1.21050700  | -1.36379500 |
| H  | 5.12603000  | 2.15427500  | -1.63554700 |
| H  | 6.19157300  | -0.00003200 | -2.26552700 |
| H  | 5.12602300  | -2.15435200 | -1.63564500 |
| C  | 3.09022400  | -3.65849300 | -0.26842600 |
| H  | 4.01936200  | -3.91265500 | -0.76959400 |
| C  | 2.29607700  | -4.64705500 | 0.30412000  |
| H  | 2.59704500  | -5.68898800 | 0.24010100  |
| C  | 1.12773500  | -4.28966500 | 0.96644700  |
| H  | 0.48542600  | -5.03078100 | 1.43201600  |
| C  | 0.77219000  | -2.94695900 | 1.01448000  |
| H  | -0.13812700 | -2.60513700 | 1.50179300  |
| O  | -2.02194800 | 0.00006100  | -2.54364100 |
| Cl | 3.09610200  | 0.00054400  | 2.82558000  |

**23**

|    |             |             |             |
|----|-------------|-------------|-------------|
| Mn | -1.40322100 | -0.00000200 | -0.96806600 |
| O  | -0.67369000 | -0.00002700 | 0.97697900  |
| N  | -1.84545200 | -2.02105400 | -0.80821000 |
| N  | -3.22423600 | 0.00016100  | -0.03039000 |
| N  | -1.84514800 | 2.02111500  | -0.80836000 |
| C  | -1.11412900 | -2.98589100 | -1.37125500 |
| H  | -0.22740100 | -2.66005900 | -1.91129900 |
| C  | -1.45778500 | -4.32802200 | -1.26286600 |
| H  | -0.83312200 | -5.08273400 | -1.73110200 |
| C  | -2.59303200 | -4.66794400 | -0.53613300 |
| H  | -2.88573600 | -5.70818300 | -0.42223800 |
| C  | -3.36401200 | -3.66183600 | 0.03633700  |
| H  | -4.26720900 | -3.90282000 | 0.58901600  |
| C  | -2.97661300 | -2.33454500 | -0.12494600 |
| C  | -3.73288800 | -1.17661100 | 0.36754600  |
| C  | -4.87172000 | -1.20847700 | 1.17145400  |
| H  | -5.29973000 | -2.15198300 | 1.49543300  |
| C  | -5.44064800 | 0.00038500  | 1.56089400  |
| H  | -6.32810100 | 0.00047700  | 2.18756900  |
| C  | -4.87154100 | 1.20913200  | 1.17136000  |
| H  | -5.29941500 | 2.15272600  | 1.49526500  |
| C  | -3.73271100 | 1.17704000  | 0.36745900  |
| C  | -2.97625700 | 2.33482500  | -0.12511200 |
| C  | -3.36344900 | 3.66218700  | 0.03608600  |
| H  | -4.26660400 | 3.90334600  | 0.58875700  |
| C  | -2.59231400 | 4.66813600  | -0.53645500 |
| H  | -2.88485300 | 5.70842900  | -0.42262500 |
| C  | -1.45712600 | 4.32799000  | -1.26317600 |
| H  | -0.83234900 | 5.08257500  | -1.73146500 |
| C  | -1.11367700 | 2.98580000  | -1.37147700 |
| H  | -0.22700100 | 2.65979100  | -1.91149700 |
| Mn | 0.99395700  | -0.00009000 | 0.47955200  |
| O  | 1.43367700  | -0.00008100 | 2.40598700  |
| O  | 0.38721100  | -0.00010600 | -1.26820700 |
| N  | 1.49934400  | 2.01332000  | 0.45638200  |
| C  | 0.76889800  | 2.96710700  | 1.03911000  |
| H  | -0.14880600 | 2.63778300  | 1.52210300  |
| C  | 1.15141800  | 4.30308700  | 1.01533700  |
| H  | 0.52747900  | 5.04904200  | 1.49820700  |
| C  | 2.32200100  | 4.64860100  | 0.35100400  |
| H  | 2.64389100  | 5.68523100  | 0.30149800  |
| C  | 3.09188300  | 3.65243900  | -0.24069800 |
| H  | 4.02366200  | 3.89600000  | -0.74253300 |
| C  | 2.66827500  | 2.32935500  | -0.16179300 |
| C  | 3.43240000  | 1.17723400  | -0.65919600 |

|    |             |             |             |
|----|-------------|-------------|-------------|
| N  | 2.88735300  | -0.00012300 | -0.32496300 |
| N  | 1.49928300  | -2.01352300 | 0.45636400  |
| C  | 2.66818000  | -2.32959500 | -0.16186000 |
| C  | 3.43235100  | -1.17749100 | -0.65923100 |
| C  | 4.62378800  | -1.21095000 | -1.38346700 |
| C  | 5.21065000  | -0.00014900 | -1.74180100 |
| C  | 4.62383900  | 1.21066600  | -1.38343000 |
| H  | 5.08269300  | 2.15364900  | -1.66366700 |
| H  | 6.13775200  | -0.00016000 | -2.30824700 |
| H  | 5.08260200  | -2.15394300 | -1.66373400 |
| C  | 3.09171100  | -3.65269900 | -0.24084000 |
| H  | 4.02346500  | -3.89628700 | -0.74270800 |
| C  | 2.32178700  | -4.64884900 | 0.35082900  |
| H  | 2.64361600  | -5.68549400 | 0.30126200  |
| C  | 1.15123900  | -4.30330200 | 1.01520500  |
| H  | 0.52726800  | -5.04924600 | 1.49804900  |
| C  | 0.76879600  | -2.96730000 | 1.03905600  |
| H  | -0.14887800 | -2.63795300 | 1.52209100  |
| O  | -1.94347600 | -0.00001900 | -2.59051500 |
| Cl | 3.10263000  | 0.00016200  | 2.81749200  |

## 24

|    |             |             |             |
|----|-------------|-------------|-------------|
| Mn | -1.25130200 | 0.00057900  | -0.56015300 |
| O  | -0.44713300 | 0.00142000  | 1.12176500  |
| N  | -1.71696200 | -2.00080300 | -0.49220500 |
| N  | -3.03522000 | 0.00275400  | 0.39122400  |
| N  | -1.71347800 | 2.00264100  | -0.49496000 |
| C  | -1.02050600 | -2.94674900 | -1.12588000 |
| H  | -0.16113100 | -2.60814200 | -1.69998700 |
| C  | -1.37196200 | -4.28880500 | -1.04064600 |
| H  | -0.77975900 | -5.03138600 | -1.56635700 |
| C  | -2.46738200 | -4.64458100 | -0.26302700 |
| H  | -2.75907400 | -5.68648700 | -0.16442200 |
| C  | -3.20201200 | -3.65370700 | 0.38073000  |
| H  | -4.07696700 | -3.90429000 | 0.97302300  |
| C  | -2.81604500 | -2.32567700 | 0.23884200  |
| C  | -3.54139700 | -1.17591900 | 0.78614600  |
| C  | -4.65986500 | -1.20548400 | 1.61632400  |
| H  | -5.08576300 | -2.14878000 | 1.94299000  |
| C  | -5.21162200 | 0.00579400  | 2.02459900  |
| H  | -6.08067600 | 0.00703300  | 2.67632100  |
| C  | -4.65768100 | 1.21553700  | 1.61472300  |
| H  | -5.08192800 | 2.16003000  | 1.94005500  |
| C  | -3.53919400 | 1.18286000  | 0.78471300  |
| C  | -2.81153500 | 2.33056300  | 0.23618300  |
| C  | -3.19439900 | 3.65957800  | 0.37720000  |
| H  | -4.06851800 | 3.91265200  | 0.96967700  |
| C  | -2.45771300 | 4.64824700  | -0.26760000 |
| H  | -2.74694000 | 5.69090800  | -0.16970600 |
| C  | -1.36343000 | 4.28935400  | -1.04541000 |
| H  | -0.76978300 | 5.03017300  | -1.57198000 |
| C  | -1.01506900 | 2.94644300  | -1.12971300 |
| H  | -0.15672000 | 2.60540800  | -1.70389800 |
| Mn | 1.25130600  | -0.00214500 | 0.56018000  |
| O  | 0.44713100  | -0.00331700 | -1.12174300 |
| N  | 1.71722000  | 1.99908300  | 0.49195700  |
| C  | 1.02104200  | 2.94514400  | 1.12576400  |
| H  | 0.16144700  | 2.60674900  | 1.69966700  |
| C  | 1.37305100  | 4.28707900  | 1.04090500  |
| H  | 0.78105500  | 5.02977600  | 1.56668200  |
| C  | 2.46880400  | 4.64258700  | 0.26362700  |
| H  | 2.76095900  | 5.68439500  | 0.16535900  |
| C  | 3.20318600  | 3.65156800  | -0.38018600 |



|    |             |             |             |
|----|-------------|-------------|-------------|
| H  | 4.07841900  | 3.90192200  | -0.97216600 |
| C  | 2.81662400  | 2.32366100  | -0.23872200 |
| C  | 3.54168000  | 1.17374400  | -0.78609300 |
| N  | 3.03522000  | -0.00483000 | -0.39122700 |
| N  | 1.71325000  | -2.00435200 | 0.49526700  |
| C  | 2.81095700  | -2.33257300 | -0.23628600 |
| C  | 3.53888500  | -1.18503500 | -0.78479600 |
| C  | 4.65735200  | -1.21793600 | -1.61483600 |
| C  | 5.21157700  | -0.00830900 | -2.02465500 |
| C  | 4.66012700  | 1.20308600  | -1.61629700 |
| H  | 5.08623100  | 2.14629700  | -1.94293800 |
| H  | 6.08061500  | -0.00972600 | -2.67639800 |
| H  | 5.08137800  | -2.16251100 | -1.94021400 |
| C  | 3.19322000  | -3.66171000 | -0.37773400 |
| H  | 4.06703400  | -3.91501500 | -0.97056100 |
| C  | 2.45631500  | -4.65022900 | 0.26705100  |
| H  | 2.74507400  | -5.69298800 | 0.16881200  |
| C  | 1.36240500  | -4.29106500 | 1.04525200  |
| H  | 0.76857900  | -5.03176100 | 1.57179300  |
| C  | 1.01459800  | -2.94803300 | 1.12993300  |
| H  | 0.15649500  | -2.60678500 | 1.70435900  |
| O  | -1.71176900 | 0.00013600  | -2.44333400 |
| Cl | -3.38327700 | 0.00374000  | -2.78796600 |
| O  | 1.71177200  | -0.00038400 | 2.44335000  |
| Cl | 3.38325300  | 0.01395400  | 2.78784000  |

**TS<sub>20-22</sub>**

|    |             |             |             |
|----|-------------|-------------|-------------|
| Mn | -1.27429300 | 0.02078800  | -0.57773100 |
| O  | -0.52256500 | 0.02745500  | 1.14225100  |
| N  | -1.82886700 | -2.08619900 | -0.48198900 |
| N  | -3.19916000 | -0.01497200 | 0.31574400  |
| N  | -1.95258700 | 2.11138800  | -0.52390800 |
| C  | -1.10318000 | -3.08170400 | -0.99621600 |
| H  | -0.22151700 | -2.78961200 | -1.56427200 |
| C  | -1.43591800 | -4.41907400 | -0.81084700 |
| H  | -0.81506300 | -5.19620000 | -1.24683500 |
| C  | -2.55477900 | -4.72205800 | -0.04454300 |
| H  | -2.83934200 | -5.75522300 | 0.13643200  |
| C  | -3.31471700 | -3.68744000 | 0.49034200  |
| H  | -4.19798600 | -3.90360300 | 1.08370000  |
| C  | -2.93445500 | -2.36937500 | 0.24684500  |
| C  | -3.69304000 | -1.19844500 | 0.71540200  |
| C  | -4.84659200 | -1.25544500 | 1.49822900  |
| H  | -5.25381300 | -2.20842200 | 1.82129400  |
| C  | -5.46181500 | -0.06389600 | 1.86342500  |
| H  | -6.35693100 | -0.08364900 | 2.47895100  |
| C  | -4.93375700 | 1.15299800  | 1.44698300  |
| H  | -5.40597300 | 2.08644400  | 1.73669300  |
| C  | -3.78138200 | 1.14550100  | 0.66056800  |
| C  | -3.11334700 | 2.34534100  | 0.12966500  |
| C  | -3.62997400 | 3.63555800  | 0.23282300  |
| H  | -4.56476800 | 3.81717000  | 0.75423800  |
| C  | -2.94215300 | 4.68827600  | -0.36118600 |
| H  | -3.33448400 | 5.69944900  | -0.29287300 |
| C  | -1.76277500 | 4.43128000  | -1.05063600 |
| H  | -1.20034900 | 5.22435600  | -1.53437600 |
| C  | -1.30219000 | 3.12057400  | -1.10555600 |
| H  | -0.38101900 | 2.86069700  | -1.62558200 |
| Mn | 1.20584800  | 0.05866500  | 0.61529500  |
| O  | 1.59692200  | 0.10770300  | 2.42064100  |
| O  | 0.44694700  | 0.02506500  | -1.09569400 |
| N  | 1.63050200  | 2.07815300  | 0.50566200  |
| C  | 0.88525300  | 3.02568700  | 1.07884800  |

|    |             |             |             |
|----|-------------|-------------|-------------|
| H  | 0.01289900  | 2.68135600  | 1.62953700  |
| C  | 1.20250900  | 4.37432200  | 0.96620500  |
| H  | 0.56865000  | 5.11649500  | 1.44176500  |
| C  | 2.32321400  | 4.73600900  | 0.22799600  |
| H  | 2.59332200  | 5.78187800  | 0.11061400  |
| C  | 3.10975100  | 3.74579100  | -0.35187200 |
| H  | 4.00358300  | 4.00347700  | -0.91210400 |
| C  | 2.74901700  | 2.41196000  | -0.18900200 |
| C  | 3.52113200  | 1.26503300  | -0.67780200 |
| N  | 3.01780000  | 0.08349500  | -0.28581500 |
| N  | 1.71036800  | -1.94243600 | 0.57557200  |
| C  | 2.85523300  | -2.24880300 | -0.08919000 |
| C  | 3.57315900  | -1.08971300 | -0.62861000 |
| C  | 4.73124200  | -1.11202000 | -1.40395500 |
| C  | 5.27729400  | 0.10141000  | -1.81225700 |
| C  | 4.67748700  | 1.30541000  | -1.45490900 |
| H  | 5.09780600  | 2.25238900  | -1.77857200 |
| H  | 6.17772600  | 0.10895600  | -2.41994800 |
| H  | 5.19389800  | -2.05211100 | -1.68714900 |
| C  | 3.29539400  | -3.56570100 | -0.17362000 |
| H  | 4.20882200  | -3.80081000 | -0.71177000 |
| C  | 2.56500700  | -4.56569300 | 0.46022000  |
| H  | 2.89960200  | -5.59811600 | 0.40852300  |
| C  | 1.41888600  | -4.22909000 | 1.17041200  |
| H  | 0.82790000  | -4.97829500 | 1.68824800  |
| C  | 1.01894600  | -2.89812700 | 1.20008200  |
| H  | 0.12190700  | -2.57621100 | 1.72464300  |
| O  | -1.98450400 | 0.25786200  | -2.43242300 |
| Cl | -1.47249500 | -0.93649500 | -3.55619200 |
| Cl | 3.48865700  | 0.14244800  | 2.93134600  |

## 22

|    |             |             |             |
|----|-------------|-------------|-------------|
| Mn | -1.38136800 | 0.00002200  | -0.88136100 |
| O  | -0.68457900 | -0.00000100 | 0.90744800  |
| N  | -1.85048900 | -2.00762200 | -0.79741400 |
| N  | -3.21727100 | 0.00007600  | 0.02244100  |
| N  | -1.85037700 | 2.00768000  | -0.79744500 |
| C  | -1.11315000 | -2.95185400 | -1.38645500 |
| H  | -0.22828900 | -2.60995700 | -1.91766800 |
| C  | -1.45814000 | -4.29561000 | -1.30564200 |
| H  | -0.83445400 | -5.03846700 | -1.79307200 |
| C  | -2.59053200 | -4.65099900 | -0.58280000 |
| H  | -2.88122400 | -5.69377200 | -0.49114500 |
| C  | -3.36372500 | -3.66016600 | 0.01425900  |
| H  | -4.26558100 | -3.91375400 | 0.56316800  |
| C  | -2.98310400 | -2.32898500 | -0.11817500 |
| C  | -3.74336500 | -1.17937500 | 0.38293100  |
| C  | -4.91188500 | -1.21054200 | 1.14275500  |
| H  | -5.35843300 | -2.15410200 | 1.43986400  |
| C  | -5.48992600 | 0.00015100  | 1.51443100  |
| H  | -6.40090300 | 0.00018300  | 2.10604500  |
| C  | -4.91182300 | 1.21080600  | 1.14272500  |
| H  | -5.35832500 | 2.15439600  | 1.43981200  |
| C  | -3.74330500 | 1.17956200  | 0.38290400  |
| C  | -2.98297900 | 2.32912100  | -0.11822100 |
| C  | -3.36352100 | 3.66032800  | 0.01418600  |
| H  | -4.26536700 | 3.91397900  | 0.56308200  |
| C  | -2.59026200 | 4.65110300  | -0.58288300 |
| H  | -2.88089200 | 5.69389600  | -0.49124900 |
| C  | -1.45788500 | 4.29563500  | -1.30570900 |
| H  | -0.83414800 | 5.03844600  | -1.79314500 |
| C  | -1.11297500 | 2.95185700  | -1.38649600 |
| H  | -0.22813000 | 2.60989600  | -1.91769400 |

|    |             |             |             |
|----|-------------|-------------|-------------|
| Mn | 1.02936600  | -0.00003400 | 0.47110100  |
| O  | 1.41081400  | -0.00003600 | 2.37366600  |
| O  | 0.36264500  | -0.00001800 | -1.27691500 |
| N  | 1.51428800  | 2.00321700  | 0.44341200  |
| C  | 0.76668600  | 2.94539100  | 1.02295700  |
| H  | -0.14794800 | 2.60469200  | 1.50278600  |
| C  | 1.13565500  | 4.28502300  | 0.99930900  |
| H  | 0.50030100  | 5.02414700  | 1.47745400  |
| C  | 2.30815300  | 4.64218000  | 0.34449600  |
| H  | 2.61952100  | 5.68204600  | 0.29870700  |
| C  | 3.09444600  | 3.65531100  | -0.24154900 |
| H  | 4.02846700  | 3.90850700  | -0.73407200 |
| C  | 2.68403600  | 2.32830600  | -0.16768200 |
| C  | 3.45555100  | 1.17948500  | -0.65444800 |
| N  | 2.90013000  | -0.00008300 | -0.33844400 |
| N  | 1.51419500  | -2.00330300 | 0.44343100  |
| C  | 2.68391600  | -2.32846000 | -0.16767700 |
| C  | 3.45549000  | -1.17968000 | -0.65444600 |
| C  | 4.66566300  | -1.21098100 | -1.34546400 |
| C  | 5.26151800  | -0.00014500 | -1.68781900 |
| C  | 4.66572700  | 1.21072300  | -1.34546500 |
| H  | 5.13357700  | 2.15419800  | -1.60798900 |
| H  | 6.20538200  | -0.00017100 | -2.22550200 |
| H  | 5.13346300  | -2.15448100 | -1.60798800 |
| C  | 3.09424600  | -3.65548900 | -0.24155000 |
| H  | 4.02824800  | -3.90874100 | -0.73408100 |
| C  | 2.30790200  | -4.64231300 | 0.34450500  |
| H  | 2.61920600  | -5.68219700 | 0.29871200  |
| C  | 1.13543400  | -4.28508600 | 0.99933500  |
| H  | 0.50004200  | -5.02417200 | 1.47748800  |
| C  | 0.76654500  | -2.94543200 | 1.02298600  |
| H  | -0.14806400 | -2.60467900 | 1.50282600  |
| O  | -1.98889100 | 0.00002400  | -2.50192100 |
| Cl | 3.05905900  | 0.00010200  | 2.81401700  |

## 25

|    |             |             |             |
|----|-------------|-------------|-------------|
| Mn | 0.82002500  | 0.05473900  | -0.58710100 |
| O  | 1.40428300  | -0.28608900 | -2.37901800 |
| O  | 0.28947200  | 0.53117200  | 1.14661200  |
| N  | 1.44504600  | 2.04077000  | -0.89440100 |
| N  | 2.71921000  | 0.08659500  | 0.19676500  |
| N  | 1.13845900  | -1.91617800 | -0.12033400 |
| C  | 0.76191400  | 2.94338800  | -1.60009200 |
| H  | -0.17737900 | 2.60260700  | -2.03121800 |
| C  | 1.21923600  | 4.24597900  | -1.76753700 |
| H  | 0.62986600  | 4.95253700  | -2.34408500 |
| C  | 2.42382700  | 4.60966600  | -1.17799100 |
| H  | 2.80748000  | 5.62086400  | -1.28278300 |
| C  | 3.14833500  | 3.66161000  | -0.46299000 |
| H  | 4.10471300  | 3.91443700  | -0.01459400 |
| C  | 2.64168200  | 2.37137900  | -0.34225100 |
| C  | 3.33736700  | 1.26742400  | 0.33362300  |
| C  | 4.52424400  | 1.35213400  | 1.06043900  |
| H  | 5.03909800  | 2.30041500  | 1.17934400  |
| C  | 5.02681800  | 0.19048100  | 1.64003400  |
| H  | 5.94805600  | 0.23230100  | 2.21442900  |
| C  | 4.35611400  | -1.02149400 | 1.50155700  |
| H  | 4.73932800  | -1.92481100 | 1.96630800  |
| C  | 3.17341700  | -1.03975500 | 0.76278800  |
| C  | 2.31046700  | -2.20110800 | 0.50927100  |
| C  | 2.64281800  | -3.51421300 | 0.82608600  |
| H  | 3.57744200  | -3.72954500 | 1.33544500  |
| C  | 1.78089700  | -4.54187600 | 0.45686200  |

|    |             |             |             |
|----|-------------|-------------|-------------|
| H  | 2.03379300  | -5.57267900 | 0.69010000  |
| C  | 0.60406300  | -4.23660100 | -0.21548900 |
| H  | -0.09567200 | -5.00795900 | -0.52318600 |
| C  | 0.31226800  | -2.90356200 | -0.47910900 |
| H  | -0.61196300 | -2.59821200 | -0.96261900 |
| Mn | -1.49365100 | 0.41602800  | 0.93301000  |
| O  | -1.97011000 | 0.87478800  | 2.54023500  |
| O  | -0.88197600 | 0.03495300  | -0.96656300 |
| N  | -1.79512500 | -1.56750800 | 1.39898800  |
| C  | -1.01603800 | -2.25559600 | 2.23801300  |
| H  | -0.16156100 | -1.71793100 | 2.64463100  |
| C  | -1.27673500 | -3.58127000 | 2.55914700  |
| H  | -0.61891200 | -4.10855400 | 3.24329100  |
| C  | -2.37418500 | -4.20533300 | 1.97482500  |
| H  | -2.59959000 | -5.24544400 | 2.19440600  |
| C  | -3.19440900 | -3.48334900 | 1.11474500  |
| H  | -4.07083900 | -3.94251500 | 0.66732800  |
| C  | -2.89494300 | -2.14898200 | 0.85442500  |
| C  | -3.71813300 | -1.25003300 | 0.03529700  |
| N  | -3.32838900 | 0.03277800  | 0.10088400  |
| N  | -2.09175300 | 2.28076000  | 0.23252400  |
| C  | -3.24337400 | 2.30506700  | -0.48756200 |
| C  | -3.89721200 | 0.99774300  | -0.63757800 |
| C  | -4.98487000 | 0.69871100  | -1.45775900 |
| C  | -5.43526400 | -0.61750700 | -1.50509500 |
| C  | -4.80079400 | -1.61118700 | -0.76502500 |
| H  | -5.12989600 | -2.64420600 | -0.82360200 |
| H  | -6.27759900 | -0.87493100 | -2.14108800 |
| H  | -5.45763400 | 1.46880100  | -2.05962300 |
| C  | -3.73573700 | 3.50127300  | -1.00119500 |
| H  | -4.65933900 | 3.50849000  | -1.57265400 |
| C  | -3.04175200 | 4.68117000  | -0.75481900 |
| H  | -3.41482000 | 5.62308300  | -1.14770600 |
| C  | -1.87963600 | 4.64310800  | 0.00676400  |
| H  | -1.31242200 | 5.54240700  | 0.22696100  |
| C  | -1.43621700 | 3.41534300  | 0.48473400  |
| H  | -0.52973800 | 3.32167900  | 1.07977100  |
| H  | 0.75824300  | -0.96237700 | -2.76102700 |
| H  | 2.67416900  | -1.11801400 | -2.35549900 |
| O  | -0.11989000 | 2.25097700  | 3.62597500  |
| H  | -0.85066200 | 1.65439700  | 3.16825200  |
| O  | -0.01661600 | -2.24886400 | -3.50118200 |
| O  | 3.51321900  | -1.73777400 | -2.36174000 |
| Cl | 4.81931700  | -0.62649000 | -2.37508800 |
| Cl | -1.73288700 | -2.17396800 | -3.33339000 |
| Cl | 0.92135400  | 1.10907700  | 4.37326900  |

**TS<sub>25</sub>**

|    |             |             |             |
|----|-------------|-------------|-------------|
| Mn | -1.24711600 | 0.11389000  | 0.22630000  |
| O  | -2.09974900 | 0.06827700  | 1.92513800  |
| O  | -0.41811300 | 0.16287900  | -1.47176900 |
| N  | -1.39984500 | 2.18493000  | 0.33481300  |
| N  | -2.95808000 | 0.51615200  | -0.83028900 |
| N  | -2.00046200 | -1.77634700 | -0.16175000 |
| C  | -0.63119100 | 2.93755800  | 1.12546200  |
| H  | 0.13624100  | 2.41068300  | 1.68918100  |
| C  | -0.79611400 | 4.31451500  | 1.21332100  |
| H  | -0.14728400 | 4.89253200  | 1.86433500  |
| C  | -1.78516700 | 4.91684500  | 0.44475500  |
| H  | -1.93380300 | 5.99265300  | 0.47931700  |
| C  | -2.60222800 | 4.12857400  | -0.35863500 |
| H  | -3.40158200 | 4.57466300  | -0.94257700 |
| C  | -2.40291100 | 2.75137700  | -0.38482500 |

|                            |             |             |             |
|----------------------------|-------------|-------------|-------------|
| C                          | -3.25293800 | 1.79451300  | -1.10680500 |
| C                          | -4.28803600 | 2.09654100  | -1.99119700 |
| H                          | -4.53973000 | 3.12665900  | -2.22450200 |
| C                          | -4.98666600 | 1.04276600  | -2.57301400 |
| H                          | -5.79724700 | 1.25257100  | -3.26526900 |
| C                          | -4.65121600 | -0.27710200 | -2.28509500 |
| H                          | -5.18768100 | -1.09974900 | -2.74781700 |
| C                          | -3.60258100 | -0.51378600 | -1.39711800 |
| C                          | -3.09059500 | -1.82369000 | -0.97286700 |
| C                          | -3.67152500 | -3.04264200 | -1.30678900 |
| H                          | -4.53692700 | -3.07039300 | -1.96219400 |
| C                          | -3.14751100 | -4.21442300 | -0.77077700 |
| H                          | -3.59600400 | -5.17276400 | -1.01830700 |
| C                          | -2.06131000 | -4.14347100 | 0.09256100  |
| H                          | -1.62950200 | -5.03273700 | 0.54175500  |
| C                          | -1.50776600 | -2.89811900 | 0.36785000  |
| H                          | -0.65281300 | -2.77720400 | 1.03103600  |
| Mn                         | 1.28172800  | -0.10811800 | -0.94646200 |
| O                          | 2.02051100  | -0.03045300 | -2.51154000 |
| O                          | 0.35825200  | -0.20851100 | 0.83533300  |
| N                          | 1.46644400  | -2.17795400 | -0.93611000 |
| C                          | 0.73524900  | -2.98521400 | -1.70732200 |
| H                          | 0.00160500  | -2.49943200 | -2.34750900 |
| C                          | 0.89297900  | -4.36582400 | -1.68321900 |
| H                          | 0.27455400  | -4.98850400 | -2.32245200 |
| C                          | 1.83434600  | -4.91354700 | -0.81974900 |
| H                          | 1.97716800  | -5.98940300 | -0.76789100 |
| C                          | 2.60602100  | -4.07093600 | -0.02698100 |
| H                          | 3.36113600  | -4.47370200 | 0.64149700  |
| C                          | 2.41369700  | -2.69476600 | -0.11089500 |
| C                          | 3.19435500  | -1.69395700 | 0.62816500  |
| N                          | 2.92051000  | -0.43082200 | 0.26459300  |
| N                          | 1.93390800  | 1.81288300  | -0.50877500 |
| C                          | 2.96244900  | 1.91472600  | 0.37168700  |
| C                          | 3.46406300  | 0.63169000  | 0.88020000  |
| C                          | 4.40709900  | 0.44666500  | 1.88997200  |
| C                          | 4.74311400  | -0.85536300 | 2.24884800  |
| C                          | 4.13279900  | -1.94198500 | 1.62948300  |
| H                          | 4.37246800  | -2.95860800 | 1.92607900  |
| H                          | 5.47623200  | -1.02544100 | 3.03226600  |
| H                          | 4.86364400  | 1.29669600  | 2.38773700  |
| C                          | 3.49373100  | 3.15776000  | 0.70270900  |
| H                          | 4.31066700  | 3.22771400  | 1.41473400  |
| C                          | 2.98191300  | 4.29757300  | 0.09203600  |
| H                          | 3.39061900  | 5.27449600  | 0.33578900  |
| C                          | 1.95924100  | 4.17132300  | -0.84098700 |
| H                          | 1.53911500  | 5.03509500  | -1.34724800 |
| C                          | 1.45629100  | 2.90417200  | -1.11065700 |
| H                          | 0.64227600  | 2.74486200  | -1.81465900 |
| H                          | -1.57494300 | -0.61592600 | 2.45977300  |
| H                          | -3.51086700 | -0.47764800 | 1.77692900  |
| H                          | 3.84734900  | -0.08303800 | -1.66051600 |
| O                          | 4.17226600  | 0.56041000  | -2.31885400 |
| O                          | -4.48265400 | -0.84192000 | 1.68351700  |
| Cl                         | -5.41899700 | 0.59250400  | 1.60175600  |
| Cl                         | 6.00035700  | 0.75953800  | -1.67006700 |
| O                          | -0.71089400 | -1.74795400 | 3.30107500  |
| Cl                         | 0.48912000  | -0.80749600 | 4.11085600  |
| <b>TS</b> <sub>25-27</sub> |             |             |             |
| Mn                         | -0.74019000 | 0.23846000  | 0.58001900  |
| O                          | -1.17199200 | 0.42010700  | 2.40638200  |
| O                          | -0.31978100 | 0.10195400  | -1.26759800 |

|    |             |             |             |
|----|-------------|-------------|-------------|
| N  | -0.98588700 | 2.27827500  | 0.41664000  |
| N  | -2.65703000 | 0.40524800  | -0.13171800 |
| N  | -1.43958700 | -1.72011500 | 0.64860600  |
| C  | -0.11701200 | 3.16744500  | 0.90264100  |
| H  | 0.77767700  | 2.75720400  | 1.36695800  |
| C  | -0.34118000 | 4.53580100  | 0.81005800  |
| H  | 0.39166800  | 5.22839300  | 1.21251000  |
| C  | -1.49988600 | 4.98023700  | 0.18383400  |
| H  | -1.70159500 | 6.04341600  | 0.08545500  |
| C  | -2.41542600 | 4.05225900  | -0.30153300 |
| H  | -3.34277700 | 4.37692600  | -0.76410000 |
| C  | -2.14513500 | 2.69489200  | -0.15942800 |
| C  | -3.05912500 | 1.61315200  | -0.55236500 |
| C  | -4.23715200 | 1.73838600  | -1.28730100 |
| H  | -4.57715900 | 2.70782700  | -1.63830700 |
| C  | -4.96060800 | 0.58410300  | -1.57475500 |
| H  | -5.87989000 | 0.65583200  | -2.14928300 |
| C  | -4.50819800 | -0.66275500 | -1.15288500 |
| H  | -5.05836800 | -1.56565300 | -1.40012300 |
| C  | -3.31785500 | -0.72254000 | -0.42818600 |
| C  | -2.65326300 | -1.93276700 | 0.07410700  |
| C  | -3.20113700 | -3.21084100 | 0.03142000  |
| H  | -4.16428200 | -3.37503800 | -0.44238400 |
| C  | -2.51362500 | -4.26409200 | 0.62585700  |
| H  | -2.93346000 | -5.26613700 | 0.60543900  |
| C  | -1.30073300 | -4.01774800 | 1.25697300  |
| H  | -0.73948000 | -4.80944400 | 1.74401600  |
| C  | -0.78821900 | -2.72540100 | 1.23707900  |
| H  | 0.16235500  | -2.47004900 | 1.70456600  |
| Mn | 1.46588400  | -0.09003900 | -1.14127100 |
| O  | 1.76637900  | -0.27353700 | -2.83174500 |
| O  | 0.98459700  | 0.06303300  | 0.80652300  |
| N  | 1.73855000  | -2.11344700 | -0.84320700 |
| C  | 0.89396100  | -3.05045900 | -1.27993900 |
| H  | 0.00069100  | -2.69086100 | -1.78722000 |
| C  | 1.14219900  | -4.40493900 | -1.09131100 |
| H  | 0.42869100  | -5.13653000 | -1.45798300 |
| C  | 2.29674500  | -4.78459800 | -0.41766400 |
| H  | 2.51725700  | -5.83473200 | -0.24645400 |
| C  | 3.18076500  | -3.80779800 | 0.02835800  |
| H  | 4.10041900  | -4.08104300 | 0.53720700  |
| C  | 2.88624600  | -2.46840300 | -0.20699800 |
| C  | 3.75374200  | -1.34309800 | 0.16199700  |
| N  | 3.35046200  | -0.16839300 | -0.34873900 |
| N  | 2.08558600  | 1.90388200  | -1.19777500 |
| C  | 3.26628400  | 2.17149900  | -0.58503300 |
| C  | 3.94512400  | 0.99402000  | -0.03111200 |
| C  | 5.07841400  | 1.00019800  | 0.78006500  |
| C  | 5.54630300  | -0.21347600 | 1.27434200  |
| C  | 4.87967700  | -1.39916400 | 0.98240100  |
| H  | 5.21596400  | -2.34232000 | 1.40155700  |
| H  | 6.42312600  | -0.23198600 | 1.91544800  |
| H  | 5.57266400  | 1.93188800  | 1.03741000  |
| C  | 3.75664800  | 3.47313600  | -0.52848600 |
| H  | 4.69598200  | 3.68115300  | -0.02490200 |
| C  | 3.03639300  | 4.49432500  | -1.13905900 |
| H  | 3.40815400  | 5.51488600  | -1.10688500 |
| C  | 1.84858900  | 4.19546200  | -1.79712000 |
| H  | 1.26120700  | 4.96378500  | -2.29066500 |
| C  | 1.40058400  | 2.88014200  | -1.79681400 |
| H  | 0.46693500  | 2.58684700  | -2.27261000 |
| H  | -0.50670200 | -0.17468300 | 2.89523100  |
| H  | -2.57915100 | -0.15328200 | 2.63721900  |

|    |             |             |             |
|----|-------------|-------------|-------------|
| H  | -0.34768000 | -0.59984200 | -2.77049500 |
| O  | -0.18800700 | -1.00052900 | -3.67014400 |
| O  | -3.53216100 | -0.53158800 | 2.79372300  |
| Cl | -4.52093600 | 0.86089200  | 2.64242400  |
| Cl | -2.05806700 | -1.54319800 | -3.97166400 |
| O  | 0.57628000  | -1.13060200 | 3.65574200  |
| Cl | 1.84838600  | -0.03050700 | 4.04542400  |

27

|    |             |             |             |
|----|-------------|-------------|-------------|
| Mn | 0.92442700  | 0.04782000  | 0.29494000  |
| O  | 1.55988400  | 0.38530900  | 2.00791600  |
| O  | 0.17427200  | -0.16871700 | -1.46863400 |
| N  | 1.26664900  | -1.94853300 | 0.67345200  |
| N  | 2.73497700  | -0.27541400 | -0.58016400 |
| N  | 1.50108900  | 1.95658200  | -0.27479900 |
| C  | 0.50086400  | -2.67754700 | 1.48988600  |
| H  | -0.35294300 | -2.16544400 | 1.92701000  |
| C  | 0.77763600  | -4.01391000 | 1.74762700  |
| H  | 0.13260000  | -4.57645500 | 2.41545600  |
| C  | 1.87302200  | -4.60025700 | 1.12285400  |
| H  | 2.10938000  | -5.64737600 | 1.29109900  |
| C  | 2.67920000  | -3.83268900 | 0.28914500  |
| H  | 3.55456900  | -4.26391600 | -0.18685500 |
| C  | 2.36664300  | -2.49127900 | 0.09112200  |
| C  | 3.17984000  | -1.53866100 | -0.67187300 |
| C  | 4.32785600  | -1.81990600 | -1.41014700 |
| H  | 4.70074100  | -2.83597500 | -1.49381500 |
| C  | 4.98463200  | -0.76432100 | -2.03596900 |
| H  | 5.88199900  | -0.95818100 | -2.61669500 |
| C  | 4.50170400  | 0.53690700  | -1.92999700 |
| H  | 5.00836400  | 1.36017900  | -2.42384600 |
| C  | 3.34392500  | 0.75466400  | -1.18499700 |
| C  | 2.67196000  | 2.03802600  | -0.96158200 |
| C  | 3.16403300  | 3.26855300  | -1.38093600 |
| H  | 4.10379900  | 3.32013300  | -1.92287300 |
| C  | 2.44623800  | 4.42285900  | -1.08308800 |
| H  | 2.81953400  | 5.39181600  | -1.40311800 |
| C  | 1.25710600  | 4.32285700  | -0.37238500 |
| H  | 0.66639200  | 5.19815900  | -0.11959700 |
| C  | 0.81571500  | 3.06308300  | 0.01997900  |
| H  | -0.11145600 | 2.92075000  | 0.56872000  |
| Mn | -1.52553700 | -0.20962800 | -0.92846000 |
| O  | -2.16545700 | -0.36075600 | -2.73145800 |
| O  | -0.80043200 | 0.10557000  | 0.77230100  |
| N  | -2.26090200 | 1.75091800  | -1.02435400 |
| C  | -1.68032800 | 2.73066900  | -1.71831900 |
| H  | -0.80893200 | 2.45141200  | -2.30624300 |
| C  | -2.16114900 | 4.03483500  | -1.68290200 |
| H  | -1.66053200 | 4.80845700  | -2.25684200 |
| C  | -3.27194700 | 4.31285600  | -0.89519000 |
| H  | -3.66688200 | 5.32324700  | -0.83510000 |
| C  | -3.89116700 | 3.28338700  | -0.19242400 |
| H  | -4.77386900 | 3.47543800  | 0.41001800  |
| C  | -3.37132800 | 1.99622000  | -0.28192100 |
| C  | -3.95979700 | 0.80512800  | 0.34374100  |
| N  | -3.32848100 | -0.33311800 | 0.01532100  |
| N  | -1.75561900 | -2.23520100 | -0.69750600 |
| C  | -2.84300800 | -2.62955400 | 0.01965900  |
| C  | -3.69837500 | -1.53365800 | 0.48794900  |
| C  | -4.80163000 | -1.63631600 | 1.33418400  |
| C  | -5.48043500 | -0.47142400 | 1.67836900  |
| C  | -5.06697100 | 0.76438100  | 1.18861900  |
| H  | -5.59186300 | 1.67422600  | 1.46250300  |

|    |             |             |             |
|----|-------------|-------------|-------------|
| H  | -6.33913800 | -0.52651400 | 2.34141800  |
| H  | -5.11787500 | -2.59843300 | 1.72476700  |
| C  | -3.09337000 | -3.98100600 | 0.23344200  |
| H  | -3.96232200 | -4.28718400 | 0.80829800  |
| C  | -2.23167200 | -4.92598600 | -0.31448700 |
| H  | -2.41868400 | -5.98487700 | -0.15825800 |
| C  | -1.13784200 | -4.50428600 | -1.06118600 |
| H  | -0.44042500 | -5.21057800 | -1.50083500 |
| C  | -0.92559500 | -3.14059800 | -1.22344500 |
| H  | -0.06883400 | -2.74811700 | -1.76380400 |
| H  | 1.09202500  | 1.22225700  | 2.37812000  |
| H  | 3.03161300  | 0.94320500  | 1.91070900  |
| O  | -1.28041200 | -1.19825800 | -3.51074200 |
| H  | -0.40919900 | -0.95621700 | -3.11615800 |
| O  | 0.62863200  | 2.56759000  | 3.07275300  |
| O  | 3.97690100  | 1.34346200  | 1.88278500  |
| Cl | 4.97754500  | -0.04668000 | 1.95626200  |
| Cl | -1.08671900 | 2.65119700  | 2.97588800  |

## 28

|    |             |             |             |
|----|-------------|-------------|-------------|
| Mn | -0.96512200 | 0.00046500  | 0.33539900  |
| O  | -1.51025600 | -0.28855300 | 2.03821200  |
| O  | -0.20904000 | 0.25530800  | -1.57110400 |
| N  | -1.45817300 | 2.01884800  | 0.53555400  |
| N  | -2.79724300 | 0.11843600  | -0.54953500 |
| N  | -1.33232800 | -1.95834500 | -0.14086100 |
| C  | -0.74490300 | 2.89342900  | 1.24769300  |
| H  | 0.14656000  | 2.50205800  | 1.73324500  |
| C  | -1.11749700 | 4.22855800  | 1.35128600  |
| H  | -0.51091700 | 4.91113100  | 1.93849200  |
| C  | -2.25426800 | 4.65735000  | 0.67636400  |
| H  | -2.56433900 | 5.69767300  | 0.72268600  |
| C  | -3.00621500 | 3.74023100  | -0.05091600 |
| H  | -3.91207200 | 4.04691800  | -0.56547000 |
| C  | -2.59686800 | 2.41163800  | -0.09384900 |
| C  | -3.33937100 | 1.32868700  | -0.74973400 |
| C  | -4.50492400 | 1.45062900  | -1.50417600 |
| H  | -4.95710100 | 2.42206800  | -1.67764600 |
| C  | -5.07292100 | 0.29528900  | -2.03328200 |
| H  | -5.98214800 | 0.36620800  | -2.62353300 |
| C  | -4.48213900 | -0.94811800 | -1.82610300 |
| H  | -4.91386100 | -1.84740400 | -2.25435100 |
| C  | -3.31054600 | -1.00464500 | -1.07306300 |
| C  | -2.51209600 | -2.20045800 | -0.77647200 |
| C  | -2.89167800 | -3.50128900 | -1.08511800 |
| H  | -3.83396200 | -3.68671500 | -1.59180000 |
| C  | -2.06068100 | -4.55654100 | -0.71976800 |
| H  | -2.34876800 | -5.57849500 | -0.95043200 |
| C  | -0.86932500 | -4.29104700 | -0.05797300 |
| H  | -0.19221800 | -5.08491500 | 0.24252300  |
| C  | -0.53575700 | -2.96917800 | 0.21571800  |
| H  | 0.39159300  | -2.69744300 | 0.71356400  |
| Mn | 1.58737900  | 0.31183400  | -1.03742900 |
| O  | 1.97309000  | 0.66940800  | -2.82119300 |
| O  | 0.75327900  | -0.00692700 | 0.68841900  |
| N  | 2.17015400  | -1.68503900 | -1.25031700 |
| C  | 1.54055700  | -2.58070800 | -2.01258800 |
| H  | 0.71548500  | -2.20476000 | -2.61359500 |
| C  | 1.91286900  | -3.92016900 | -2.02427400 |
| H  | 1.37645800  | -4.62207000 | -2.65522800 |
| C  | 2.95617800  | -4.32924400 | -1.20173800 |
| H  | 3.25942500  | -5.37226100 | -1.17297500 |
| C  | 3.62141300  | -3.39079400 | -0.41862500 |



|    |             |             |             |
|----|-------------|-------------|-------------|
| H  | 4.45006500  | -3.68492900 | 0.21876300  |
| C  | 3.21772700  | -2.06108500 | -0.47410400 |
| C  | 3.85922000  | -0.95547400 | 0.24346700  |
| N  | 3.33245100  | 0.24988100  | -0.04408700 |
| N  | 1.92380400  | 2.28755200  | -0.64610600 |
| C  | 2.99162800  | 2.56262200  | 0.15038600  |
| C  | 3.75345800  | 1.38054200  | 0.55357700  |
| C  | 4.80900500  | 1.33653200  | 1.46266300  |
| C  | 5.38624600  | 0.10480900  | 1.75105400  |
| C  | 4.91302400  | -1.05711300 | 1.14759900  |
| H  | 5.34951300  | -2.02291100 | 1.38245100  |
| H  | 6.20563800  | 0.04734600  | 2.46182900  |
| H  | 5.16041900  | 2.24358700  | 1.94458800  |
| C  | 3.30174300  | 3.87457700  | 0.48953700  |
| H  | 4.15446700  | 4.08331800  | 1.12865600  |
| C  | 2.52201400  | 4.90820900  | -0.02047800 |
| H  | 2.75537600  | 5.93896500  | 0.23181400  |
| C  | 1.45400500  | 4.60996000  | -0.85817800 |
| H  | 0.82366700  | 5.38838500  | -1.27725100 |
| C  | 1.17537900  | 3.27732700  | -1.13977900 |
| H  | 0.34399200  | 2.97724500  | -1.77300100 |
| H  | -0.94127900 | -1.05065800 | 2.46613200  |
| H  | -2.97971200 | -0.95141800 | 2.01579500  |
| O  | 1.01186600  | 1.38509100  | -3.49313600 |
| H  | -0.21306000 | 0.85919900  | -2.37357000 |
| O  | -0.36014600 | -2.25837200 | 3.20252200  |
| O  | -3.90549700 | -1.37593800 | 2.03713500  |
| Cl | -4.93885600 | -0.00792900 | 2.06072500  |
| Cl | 1.35483600  | -2.13996500 | 3.16780200  |

## 29

|    |             |             |             |
|----|-------------|-------------|-------------|
| Mn | 1.28874100  | -0.05562200 | 0.25641400  |
| O  | 2.23717500  | 0.24299000  | 1.85827700  |
| O  | 0.26692500  | -0.21687800 | -1.34396700 |
| N  | 1.21497200  | -2.05474900 | 0.80288100  |
| N  | 2.86099400  | -0.86308300 | -0.75507800 |
| N  | 2.20218800  | 1.61085200  | -0.55765100 |
| C  | 0.40976800  | -2.52326400 | 1.75976800  |
| H  | -0.26757300 | -1.79916700 | 2.20683900  |
| C  | 0.43253200  | -3.85765500 | 2.14408400  |
| H  | -0.23797600 | -4.20285800 | 2.92505200  |
| C  | 1.31260200  | -4.72144700 | 1.50098400  |
| H  | 1.34789200  | -5.77392600 | 1.76861400  |
| C  | 2.16340100  | -4.22610800 | 0.51898100  |
| H  | 2.87745600  | -4.87658100 | 0.02280300  |
| C  | 2.11076700  | -2.87338500 | 0.19544600  |
| C  | 3.01459700  | -2.19628700 | -0.74195200 |
| C  | 3.98663400  | -2.79378700 | -1.54262600 |
| H  | 4.12392700  | -3.87049800 | -1.54173000 |
| C  | 4.77899600  | -1.97370800 | -2.33992500 |
| H  | 5.54566000  | -2.41507800 | -2.97047000 |
| C  | 4.59962300  | -0.59352200 | -2.33957800 |
| H  | 5.21667100  | 0.04408000  | -2.96470000 |
| C  | 3.60485700  | -0.05417700 | -1.52479400 |
| C  | 3.25667000  | 1.36443100  | -1.38100600 |
| C  | 3.93655500  | 2.41307000  | -1.99077800 |
| H  | 4.77568700  | 2.20954000  | -2.64872500 |
| C  | 3.53696000  | 3.72139200  | -1.73532200 |
| H  | 4.06031200  | 4.54974200  | -2.20495500 |
| C  | 2.47368900  | 3.95490700  | -0.87345000 |
| H  | 2.13322800  | 4.96012700  | -0.64363400 |
| C  | 1.82808500  | 2.86526700  | -0.29824800 |
| H  | 0.98224700  | 2.98487800  | 0.37247800  |

|    |             |             |             |
|----|-------------|-------------|-------------|
| Mn | -1.31958600 | 0.18097700  | -0.62071400 |
| O  | -2.32295100 | 0.29476100  | -2.23236900 |
| O  | -0.27568100 | 0.41440000  | 0.94702000  |
| N  | -1.58977000 | 2.25466700  | -0.70652000 |
| C  | -0.93438400 | 3.05811400  | -1.54509300 |
| H  | -0.23357500 | 2.57497300  | -2.22166700 |
| C  | -1.13075100 | 4.43440300  | -1.54512000 |
| H  | -0.57235600 | 5.05685400  | -2.23745100 |
| C  | -2.03989400 | 4.97615400  | -0.64448400 |
| H  | -2.21192400 | 6.04841700  | -0.61116200 |
| C  | -2.74961900 | 4.13230500  | 0.20380000  |
| H  | -3.48770100 | 4.53044200  | 0.89368700  |
| C  | -2.51795500 | 2.76167600  | 0.14660700  |
| C  | -3.25104200 | 1.75581500  | 0.92754600  |
| N  | -2.92675700 | 0.49311300  | 0.61200100  |
| N  | -1.92680300 | -1.73525400 | -0.16468500 |
| C  | -2.93209600 | -1.84919600 | 0.74160500  |
| C  | -3.46706000 | -0.57088100 | 1.22358800  |
| C  | -4.44086800 | -0.38838000 | 2.20494400  |
| C  | -4.80999000 | 0.91200200  | 2.53492500  |
| C  | -4.21570100 | 2.00105300  | 1.90402600  |
| H  | -4.49350000 | 3.01702900  | 2.16750600  |
| H  | -5.56446800 | 1.07945000  | 3.29833900  |
| H  | -4.89439400 | -1.23935000 | 2.70359900  |
| C  | -3.40458200 | -3.10248200 | 1.12034900  |
| H  | -4.20479600 | -3.18378600 | 1.84970500  |
| C  | -2.85714800 | -4.23808800 | 0.53388600  |
| H  | -3.21924100 | -5.22297900 | 0.81646000  |
| C  | -1.85524100 | -4.10051800 | -0.42069500 |
| H  | -1.40653100 | -4.96228400 | -0.90521400 |
| C  | -1.41015500 | -2.82413200 | -0.74040300 |
| H  | -0.61183600 | -2.65121500 | -1.45757100 |
| H  | 2.00900300  | 1.18428700  | 2.18018100  |
| H  | 3.74134000  | 0.45993800  | 1.54005300  |
| O  | -2.26244000 | -0.90619100 | -3.01371400 |
| H  | -3.10905800 | -1.41270300 | -2.67866100 |
| O  | 1.93365000  | 2.69275500  | 2.76292400  |
| O  | 4.74221300  | 0.64363800  | 1.36032200  |
| Cl | 5.44517000  | -0.91369000 | 1.50454700  |
| Cl | 0.27260700  | 3.13089800  | 2.87338700  |
| O  | -4.31963700 | -2.17618000 | -2.14623300 |
| Cl | -5.53781800 | -0.97355000 | -1.94787400 |

### 30

|    |             |             |             |
|----|-------------|-------------|-------------|
| Mn | 1.28356700  | -0.07404900 | 0.26991300  |
| O  | 2.28432100  | 0.20310800  | 1.86641300  |
| O  | 0.27109500  | -0.25183600 | -1.32504900 |
| N  | 1.18362300  | -2.07276800 | 0.81526700  |
| N  | 2.85328200  | -0.90495400 | -0.74184800 |
| N  | 2.21431100  | 1.57911000  | -0.56608400 |
| C  | 0.36542500  | -2.53317300 | 1.76486200  |
| H  | -0.31066300 | -1.80234000 | 2.20308800  |
| C  | 0.37403400  | -3.86614700 | 2.15508400  |
| H  | -0.30680800 | -4.20321200 | 2.93073100  |
| C  | 1.25535500  | -4.73849400 | 1.52562400  |
| H  | 1.28191800  | -5.78973300 | 1.79923600  |
| C  | 2.11878000  | -4.25290500 | 0.54973300  |
| H  | 2.83374000  | -4.91015200 | 0.06378000  |
| C  | 2.07819900  | -2.90147000 | 0.21892200  |
| C  | 2.99223600  | -2.23893600 | -0.72042100 |
| C  | 3.95436300  | -2.85326400 | -1.52065400 |
| H  | 4.07930700  | -3.93155200 | -1.51363700 |
| C  | 4.75103100  | -2.04719100 | -2.32813100 |

|    |             |             |             |
|----|-------------|-------------|-------------|
| H  | 5.50990800  | -2.50124800 | -2.95918900 |
| C  | 4.58459900  | -0.66522600 | -2.33877300 |
| H  | 5.20369400  | -0.03932800 | -2.97376600 |
| C  | 3.59960600  | -0.11008000 | -1.52217800 |
| C  | 3.26328800  | 1.31350000  | -1.39080600 |
| C  | 3.95048800  | 2.34763200  | -2.01720100 |
| H  | 4.78449900  | 2.12706100  | -2.67625900 |
| C  | 3.56392100  | 3.66290000  | -1.77841700 |
| H  | 4.09245500  | 4.48006100  | -2.26174300 |
| C  | 2.50602700  | 3.91728800  | -0.91568400 |
| H  | 2.17492500  | 4.92854200  | -0.69890800 |
| C  | 1.85338500  | 2.84086700  | -0.32368800 |
| H  | 1.01019300  | 2.97698300  | 0.34754600  |
| Mn | -1.32225900 | 0.17481400  | -0.62606700 |
| O  | -2.29674100 | 0.26149700  | -2.23176400 |
| O  | -0.24320100 | 0.43339700  | 0.97664500  |
| N  | -1.56572700 | 2.28298200  | -0.72743500 |
| C  | -0.90895300 | 3.07070400  | -1.57948700 |
| H  | -0.22354700 | 2.57139300  | -2.26100300 |
| C  | -1.08241800 | 4.45025500  | -1.59022500 |
| H  | -0.52369200 | 5.05823000  | -2.29529300 |
| C  | -1.97084000 | 5.01428000  | -0.68212900 |
| H  | -2.12551800 | 6.08947800  | -0.65596200 |
| C  | -2.68231700 | 4.18852500  | 0.18225500  |
| H  | -3.40482200 | 4.60428000  | 0.87835700  |
| C  | -2.47204300 | 2.81351900  | 0.13136000  |
| C  | -3.21390100 | 1.82735200  | 0.92974800  |
| N  | -2.92913200 | 0.55352300  | 0.61615700  |
| N  | -2.01407600 | -1.72834000 | -0.13494300 |
| C  | -3.00987200 | -1.78983800 | 0.78479500  |
| C  | -3.49295000 | -0.48532300 | 1.25208800  |
| C  | -4.44576300 | -0.26544000 | 2.24639500  |
| C  | -4.77183300 | 1.04718600  | 2.57111600  |
| C  | -4.15437900 | 2.11040000  | 1.91936200  |
| H  | -4.39699100 | 3.13679700  | 2.17710700  |
| H  | -5.50845200 | 1.24454900  | 3.34483600  |
| H  | -4.91604800 | -1.09825200 | 2.76011600  |
| C  | -3.52452300 | -3.01762000 | 1.19301900  |
| H  | -4.31999500 | -3.05626300 | 1.93136200  |
| C  | -3.01983700 | -4.18437300 | 0.62941600  |
| H  | -3.41179100 | -5.14980500 | 0.93824900  |
| C  | -2.01994500 | -4.10186800 | -0.33389800 |
| H  | -1.60218700 | -4.98943200 | -0.79940900 |
| C  | -1.53998600 | -2.84730700 | -0.68863800 |
| H  | -0.74736600 | -2.71828400 | -1.42203700 |
| H  | 2.04718200  | 1.13528600  | 2.19172200  |
| H  | 3.76180200  | 0.42901900  | 1.53239200  |
| O  | -2.20906600 | -0.89783400 | -3.01177700 |
| H  | -3.42343000 | -1.61095700 | -2.58305400 |
| O  | 1.98407800  | 2.67854800  | 2.75751500  |
| O  | 4.76445100  | 0.62171100  | 1.33775600  |
| Cl | 5.48212800  | -0.93023100 | 1.46802300  |
| Cl | 0.33963700  | 3.18012400  | 2.87423100  |
| O  | -4.26049800 | -2.16918400 | -2.24647200 |
| Cl | -5.50115000 | -0.99912200 | -2.03925600 |

**TS<sub>30-31</sub>**

|    |            |             |             |
|----|------------|-------------|-------------|
| Mn | 1.30581900 | -0.09429800 | 0.27038700  |
| O  | 2.28377300 | 0.16400300  | 1.87224400  |
| O  | 0.29983900 | -0.25425800 | -1.34257600 |
| N  | 1.17634400 | -2.09158000 | 0.79588100  |
| N  | 2.87670600 | -0.93008800 | -0.73101000 |
| N  | 2.25519800 | 1.55552200  | -0.54494400 |

|    |             |             |             |
|----|-------------|-------------|-------------|
| C  | 0.33243100  | -2.55161700 | 1.72301900  |
| H  | -0.33778600 | -1.81589600 | 2.16159900  |
| C  | 0.30929400  | -3.89084900 | 2.09042800  |
| H  | -0.39237200 | -4.22798800 | 2.84724300  |
| C  | 1.18629700  | -4.76874200 | 1.46275900  |
| H  | 1.18857400  | -5.82464700 | 1.71908700  |
| C  | 2.07620400  | -4.28363800 | 0.51066200  |
| H  | 2.78717900  | -4.94668300 | 0.02659600  |
| C  | 2.06585300  | -2.92672300 | 0.20027000  |
| C  | 3.00263900  | -2.26583700 | -0.71779800 |
| C  | 3.97147400  | -2.88176300 | -1.50869000 |
| H  | 4.08664100  | -3.96103100 | -1.50996900 |
| C  | 4.78796800  | -2.07634900 | -2.29678900 |
| H  | 5.55236300  | -2.53246500 | -2.91961300 |
| C  | 4.63491400  | -0.69285700 | -2.29828800 |
| H  | 5.26988500  | -0.06749800 | -2.91791100 |
| C  | 3.64253400  | -0.13537900 | -1.49246100 |
| C  | 3.31664800  | 1.28949600  | -1.35333400 |
| C  | 4.02427400  | 2.32414600  | -1.95552500 |
| H  | 4.86883700  | 2.10331900  | -2.60087600 |
| C  | 3.64472100  | 3.64003600  | -1.70917300 |
| H  | 4.18970200  | 4.45770700  | -2.17293500 |
| C  | 2.57285000  | 3.89439700  | -0.86381000 |
| H  | 2.24670400  | 4.90609700  | -0.64172100 |
| C  | 1.90046400  | 2.81755900  | -0.29530300 |
| H  | 1.04700900  | 2.95354800  | 0.36295200  |
| Mn | -1.28180400 | 0.19446500  | -0.64982300 |
| O  | -2.26764600 | 0.28613000  | -2.29529600 |
| O  | -0.22491900 | 0.43544500  | 0.95607900  |
| N  | -1.51779800 | 2.30602000  | -0.76400800 |
| C  | -0.83509200 | 3.08747000  | -1.60150300 |
| H  | -0.13952000 | 2.58204000  | -2.26801000 |
| C  | -0.99606300 | 4.46842300  | -1.61611800 |
| H  | -0.41639300 | 5.07158400  | -2.30828500 |
| C  | -1.90057100 | 5.03966600  | -0.72879800 |
| H  | -2.04722700 | 6.11605800  | -0.70638800 |
| C  | -2.63783800 | 4.22061700  | 0.12033600  |
| H  | -3.37154400 | 4.64471200  | 0.79926100  |
| C  | -2.43729700 | 2.84382300  | 0.07603400  |
| C  | -3.20052800 | 1.86226700  | 0.86073100  |
| N  | -2.90642000 | 0.58642100  | 0.56383700  |
| N  | -2.01328900 | -1.70498100 | -0.19365100 |
| C  | -3.02058300 | -1.75859100 | 0.71324000  |
| C  | -3.49535200 | -0.45021200 | 1.18007600  |
| C  | -4.47411700 | -0.22574300 | 2.14754900  |
| C  | -4.80467000 | 1.08838200  | 2.46046700  |
| C  | -4.16868000 | 2.14902600  | 1.82242600  |
| H  | -4.41934900 | 3.17597300  | 2.06990700  |
| H  | -5.56287900 | 1.28958200  | 3.21200900  |
| H  | -4.96467700 | -1.05622200 | 2.64590200  |
| C  | -3.56114000 | -2.98150400 | 1.10087100  |
| H  | -4.36779100 | -3.01528300 | 1.82737400  |
| C  | -3.06982300 | -4.15031600 | 0.52913200  |
| H  | -3.48237300 | -5.11216000 | 0.82184000  |
| C  | -2.05915900 | -4.07448100 | -0.42317500 |
| H  | -1.65360600 | -4.96360000 | -0.89637300 |
| C  | -1.55378900 | -2.82412100 | -0.75776700 |
| H  | -0.75187000 | -2.69971300 | -1.48210000 |
| H  | 2.05071000  | 1.09646000  | 2.20595300  |
| H  | 3.77583900  | 0.38602100  | 1.55873100  |
| O  | -2.21405500 | -0.82989600 | -3.06277600 |
| H  | -3.69073300 | -1.41015800 | -2.59517300 |
| O  | 2.00664100  | 2.62316400  | 2.78517400  |

|    |             |             |             |
|----|-------------|-------------|-------------|
| O  | 4.77963000  | 0.57442300  | 1.38149400  |
| Cl | 5.48566900  | -0.98331800 | 1.50547400  |
| Cl | 0.37377500  | 3.16288100  | 2.88377500  |
| O  | -4.36572800 | -2.07345800 | -2.26564200 |
| Cl | -5.80440600 | -0.99292200 | -1.57409000 |

**31**

|    |             |             |             |
|----|-------------|-------------|-------------|
| Mn | 1.33145200  | -0.01996800 | 0.25634900  |
| O  | 2.26701600  | 0.27246000  | 1.85446400  |
| O  | 0.29481800  | -0.16677500 | -1.36048700 |
| N  | 1.26161600  | -2.02664000 | 0.77514500  |
| N  | 2.90891400  | -0.80322900 | -0.75354700 |
| N  | 2.21380200  | 1.65955800  | -0.54209000 |
| C  | 0.43918200  | -2.51736700 | 1.70586500  |
| H  | -0.23437800 | -1.80113100 | 2.17041300  |
| C  | 0.44074400  | -3.86460100 | 2.04324600  |
| H  | -0.24410700 | -4.22833500 | 2.80310100  |
| C  | 1.31691900  | -4.71683700 | 1.37971000  |
| H  | 1.33351200  | -5.77889500 | 1.60858600  |
| C  | 2.18721600  | -4.19860300 | 0.42694200  |
| H  | 2.89799600  | -4.84129700 | -0.08427800 |
| C  | 2.15622600  | -2.83449700 | 0.15095100  |
| C  | 3.07747200  | -2.13505000 | -0.75259300 |
| C  | 4.08185300  | -2.70802800 | -1.53068100 |
| H  | 4.23309200  | -3.78266200 | -1.54105500 |
| C  | 4.89157300  | -1.86707300 | -2.28778100 |
| H  | 5.68483600  | -2.29084400 | -2.89706700 |
| C  | 4.69699500  | -0.48905900 | -2.27306300 |
| H  | 5.32840000  | 0.16517600  | -2.86571600 |
| C  | 3.66830900  | 0.02642400  | -1.48576200 |
| C  | 3.29381500  | 1.43810300  | -1.33858100 |
| C  | 3.96570000  | 2.50480300  | -1.92550800 |
| H  | 4.82819500  | 2.32389200  | -2.55952600 |
| C  | 3.52666900  | 3.80222000  | -1.67934500 |
| H  | 4.04467400  | 4.64404100  | -2.13051900 |
| C  | 2.42972400  | 4.00862900  | -0.85297000 |
| H  | 2.05722800  | 5.00490300  | -0.63445100 |
| C  | 1.79615800  | 2.90307600  | -0.29594300 |
| H  | 0.92893200  | 2.99887800  | 0.35163000  |
| Mn | -1.27162100 | 0.14145400  | -0.58434300 |
| O  | -2.37053800 | 0.05065600  | -2.29884000 |
| O  | -0.23933000 | 0.43929900  | 0.95018600  |
| N  | -1.68443700 | 2.18170900  | -0.74923600 |
| C  | -1.04001800 | 3.00866200  | -1.57495900 |
| H  | -0.31560700 | 2.54991600  | -2.24382900 |
| C  | -1.27480400 | 4.37873400  | -1.57096600 |
| H  | -0.72645100 | 5.02027000  | -2.25378300 |
| C  | -2.20725500 | 4.89066900  | -0.67663500 |
| H  | -2.40842500 | 5.95772800  | -0.63948300 |
| C  | -2.89622700 | 4.02455400  | 0.16644500  |
| H  | -3.64399900 | 4.40025700  | 0.85847700  |
| C  | -2.62403800 | 2.66186300  | 0.10725600  |
| C  | -3.31053100 | 1.63243200  | 0.89874600  |
| N  | -2.91136200 | 0.38539100  | 0.60903100  |
| N  | -1.85604200 | -1.80145400 | -0.20685500 |
| C  | -2.86182000 | -1.95863400 | 0.69360500  |
| C  | -3.42473200 | -0.70216900 | 1.20319500  |
| C  | -4.41864200 | -0.55897200 | 2.17050800  |
| C  | -4.84992700 | 0.72520300  | 2.48960300  |
| C  | -4.30340900 | 1.83750400  | 1.85562700  |
| H  | -4.64167900 | 2.84005000  | 2.09893100  |
| H  | -5.62411600 | 0.86075600  | 3.23943400  |
| H  | -4.84712800 | -1.42842300 | 2.65934000  |

|    |             |             |             |
|----|-------------|-------------|-------------|
| C  | -3.32380600 | -3.22947300 | 1.02138700  |
| H  | -4.12511200 | -3.34712200 | 1.74456200  |
| C  | -2.76913700 | -4.33592900 | 0.38640500  |
| H  | -3.12418600 | -5.33412000 | 0.62812500  |
| C  | -1.77373300 | -4.15241000 | -0.56680500 |
| H  | -1.32508600 | -4.98999600 | -1.09198200 |
| C  | -1.33676000 | -2.86008000 | -0.83267800 |
| H  | -0.54300700 | -2.65120000 | -1.54625400 |
| H  | 2.02469300  | 1.21036200  | 2.18605300  |
| H  | 3.78343700  | 0.50143000  | 1.56112700  |
| O  | -2.03966600 | -0.89461700 | -3.10304700 |
| H  | -3.90520700 | -1.87251400 | -2.73639800 |
| O  | 1.92975800  | 2.70199200  | 2.76667400  |
| O  | 4.78507200  | 0.68625400  | 1.40408700  |
| Cl | 5.48194800  | -0.87441100 | 1.54105900  |
| Cl | 0.26646900  | 3.12396000  | 2.89663900  |
| O  | -4.40237000 | -2.54223100 | -2.22921800 |
| Cl | -5.84136600 | -0.42581300 | -1.53267400 |

**<sup>31</sup>**

|    |             |             |             |
|----|-------------|-------------|-------------|
| Mn | 1.32735600  | -0.02120100 | 0.25447200  |
| O  | 2.26390800  | 0.27194700  | 1.85237400  |
| O  | 0.29030000  | -0.16658100 | -1.36206400 |
| N  | 1.25431900  | -2.02679800 | 0.77666100  |
| N  | 2.90386800  | -0.80904100 | -0.75391200 |
| N  | 2.21360200  | 1.65553300  | -0.54578100 |
| C  | 0.43197800  | -2.51411200 | 1.70928200  |
| H  | -0.24068500 | -1.79591100 | 2.17216200  |
| C  | 0.43269400  | -3.86029400 | 2.05077300  |
| H  | -0.25182700 | -4.22115300 | 2.81229500  |
| C  | 1.30750600  | -4.71531500 | 1.38900300  |
| H  | 1.32326700  | -5.77670900 | 1.62100400  |
| C  | 2.17738700  | -4.20070500 | 0.43391000  |
| H  | 2.88719000  | -4.84552500 | -0.07599300 |
| C  | 2.14762200  | -2.83733600 | 0.15410600  |
| C  | 3.06973400  | -2.14118400 | -0.75121200 |
| C  | 4.07270600  | -2.71727900 | -1.52880800 |
| H  | 4.22163300  | -3.79224400 | -1.53791000 |
| C  | 4.88411600  | -1.87891600 | -2.28697500 |
| H  | 5.67645000  | -2.30511400 | -2.89577900 |
| C  | 4.69262000  | -0.50044600 | -2.27374500 |
| H  | 5.32558000  | 0.15168400  | -2.86705900 |
| C  | 3.66508300  | 0.01815400  | -1.48697700 |
| C  | 3.29386800  | 1.43082800  | -1.34104200 |
| C  | 3.96917200  | 2.49543200  | -1.92783300 |
| H  | 4.83201300  | 2.31195000  | -2.56062000 |
| C  | 3.53309300  | 3.79411500  | -1.68308800 |
| H  | 4.05390400  | 4.63433600  | -2.13400700 |
| C  | 2.43549800  | 4.00381400  | -0.85839200 |
| H  | 2.06521800  | 5.00115000  | -0.64096500 |
| C  | 1.79863400  | 2.90022100  | -0.30125500 |
| H  | 0.93107100  | 2.99854000  | 0.34551700  |
| Mn | -1.27644600 | 0.14807400  | -0.58701600 |
| O  | -2.37504200 | 0.06995600  | -2.29965200 |
| O  | -0.24168600 | 0.44308400  | 0.94754100  |
| N  | -1.68209600 | 2.18923400  | -0.75123100 |
| C  | -1.03761000 | 3.01332600  | -1.57976100 |
| H  | -0.31638500 | 2.55169300  | -2.25007000 |
| C  | -1.26838200 | 4.38405900  | -1.57662100 |
| H  | -0.72010900 | 5.02322700  | -2.26171600 |
| C  | -2.19671900 | 4.89966100  | -0.68011300 |
| H  | -2.39461200 | 5.96734800  | -0.64346900 |
| C  | -2.88604600 | 4.03642900  | 0.16564800  |

|    |             |             |             |
|----|-------------|-------------|-------------|
| H  | -3.63093200 | 4.41508500  | 0.85915900  |
| C  | -2.61812600 | 2.67284600  | 0.10718000  |
| C  | -3.30620100 | 1.64629600  | 0.90107100  |
| N  | -2.91120700 | 0.39767900  | 0.61268300  |
| N  | -1.86635100 | -1.79371300 | -0.20409400 |
| C  | -2.86873200 | -1.94648700 | 0.70072400  |
| C  | -3.42653300 | -0.68738500 | 1.20949400  |
| C  | -4.41857400 | -0.53986500 | 2.17799700  |
| C  | -4.84630500 | 0.74596500  | 2.49515700  |
| C  | -4.29757500 | 1.85566700  | 1.85861900  |
| H  | -4.63301200 | 2.85952600  | 2.10043700  |
| H  | -5.61942100 | 0.88490400  | 3.24547700  |
| H  | -4.84871400 | -1.40727700 | 2.66897500  |
| C  | -3.33087600 | -3.21555800 | 1.03517000  |
| H  | -4.13026300 | -3.32943100 | 1.76106200  |
| C  | -2.77791000 | -4.32527300 | 0.40435500  |
| H  | -3.13248000 | -5.32221300 | 0.65191200  |
| C  | -1.78447400 | -4.14662500 | -0.55180800 |
| H  | -1.33650200 | -4.98690300 | -1.07326600 |
| C  | -1.34869100 | -2.85558400 | -0.82580500 |
| H  | -0.55661200 | -2.65054700 | -1.54230100 |
| H  | 2.02444200  | 1.21083500  | 2.18215500  |
| H  | 3.78039000  | 0.49364300  | 1.56051800  |
| O  | -2.08498300 | -0.90296000 | -3.08688300 |
| H  | -3.85157700 | -1.96189700 | -2.72726100 |
| O  | 1.93405700  | 2.70511500  | 2.76035400  |
| O  | 4.78300200  | 0.67537400  | 1.40407600  |
| Cl | 5.47560600  | -0.88694100 | 1.54400500  |
| Cl | 0.27152500  | 3.12998500  | 2.89134800  |
| O  | -4.40134400 | -2.60634300 | -2.23974200 |
| Cl | -5.77390400 | -0.44154400 | -1.55531300 |

**<sup>32</sup>**

|    |             |             |             |
|----|-------------|-------------|-------------|
| Mn | 1.31956400  | -0.04461400 | 0.28400700  |
| O  | 2.24239900  | 0.25722200  | 1.86845200  |
| O  | 0.23035600  | -0.17454900 | -1.29576900 |
| N  | 1.21607300  | -2.03546900 | 0.83620000  |
| N  | 2.84160700  | -0.88138300 | -0.75889900 |
| N  | 2.23071100  | 1.60076900  | -0.55963800 |
| C  | 0.42529500  | -2.48178000 | 1.81567100  |
| H  | -0.20203400 | -1.73641800 | 2.29855900  |
| C  | 0.40367100  | -3.82218300 | 2.17841900  |
| H  | -0.25366700 | -4.15092100 | 2.97742900  |
| C  | 1.22168500  | -4.71244900 | 1.49072400  |
| H  | 1.21822400  | -5.77004600 | 1.73976700  |
| C  | 2.06071000  | -4.23873600 | 0.48797400  |
| H  | 2.72824700  | -4.91124100 | -0.04234200 |
| C  | 2.05642200  | -2.87994200 | 0.18724300  |
| C  | 2.95653800  | -2.22005900 | -0.76298700 |
| C  | 3.89208800  | -2.83573700 | -1.59181200 |
| H  | 3.99500400  | -3.91607700 | -1.60551500 |
| C  | 4.69166500  | -2.03100300 | -2.39719700 |
| H  | 5.43051400  | -2.48792700 | -3.04934800 |
| C  | 4.55273700  | -0.64639400 | -2.37880000 |
| H  | 5.17273400  | -0.01942700 | -3.01163300 |
| C  | 3.59080700  | -0.08617600 | -1.53951400 |
| C  | 3.27446500  | 1.33770100  | -1.39043700 |
| C  | 3.96164700  | 2.37558800  | -2.00973700 |
| H  | 4.79470900  | 2.15912100  | -2.67116000 |
| C  | 3.57370600  | 3.68867500  | -1.76110400 |
| H  | 4.10320400  | 4.50934100  | -2.23713200 |
| C  | 2.51213800  | 3.93779900  | -0.90099700 |
| H  | 2.17959800  | 4.94761200  | -0.68050400 |

|    |             |             |             |
|----|-------------|-------------|-------------|
| C  | 1.86109800  | 2.85875100  | -0.31233900 |
| H  | 1.01758000  | 2.98877200  | 0.35986700  |
| Mn | -1.30404100 | 0.19688000  | -0.48828800 |
| O  | -2.45158600 | 0.10971200  | -2.18475400 |
| O  | -0.25912800 | 0.45135700  | 0.99037500  |
| N  | -1.63196100 | 2.23126000  | -0.68126700 |
| C  | -0.97619400 | 3.01245200  | -1.54226600 |
| H  | -0.28720600 | 2.51005500  | -2.21661200 |
| C  | -1.15816000 | 4.39021700  | -1.56169800 |
| H  | -0.60293700 | 4.99434800  | -2.27240700 |
| C  | -2.04368500 | 4.95723200  | -0.65328300 |
| H  | -2.19906900 | 6.03225700  | -0.63195300 |
| C  | -2.74732700 | 4.13719000  | 0.22343900  |
| H  | -3.46087500 | 4.55789800  | 0.92527800  |
| C  | -2.53533200 | 2.76354300  | 0.18621200  |
| C  | -3.24759600 | 1.77867700  | 1.01065600  |
| N  | -2.91374300 | 0.51005800  | 0.72904800  |
| N  | -1.93235700 | -1.72225000 | -0.04839400 |
| C  | -2.91973200 | -1.82813400 | 0.87976000  |
| C  | -3.43919000 | -0.54534000 | 1.36686800  |
| C  | -4.40064900 | -0.34675800 | 2.35658300  |
| C  | -4.77433600 | 0.95921400  | 2.65990500  |
| C  | -4.20244700 | 2.03888400  | 1.99217000  |
| H  | -4.49237000 | 3.05759800  | 2.23042400  |
| H  | -5.52031900 | 1.13937800  | 3.42869100  |
| H  | -4.84494500 | -1.18936300 | 2.87725500  |
| C  | -3.40701100 | -3.07684600 | 1.25143200  |
| H  | -4.19190500 | -3.15207000 | 1.99798100  |
| C  | -2.90075900 | -4.21352500 | 0.63008200  |
| H  | -3.27910600 | -5.19469800 | 0.90374100  |
| C  | -1.92147700 | -4.08198900 | -0.34836400 |
| H  | -1.50821100 | -4.94481200 | -0.86142900 |
| C  | -1.45127300 | -2.81103400 | -0.65481300 |
| H  | -0.66397000 | -2.64286800 | -1.38518300 |
| H  | 2.05169300  | 1.21872000  | 2.18339900  |
| H  | 3.77825400  | 0.42015000  | 1.52165600  |
| O  | -2.20031900 | -0.89744900 | -2.93323900 |
| H  | -4.39939100 | -0.96747500 | -3.64010100 |
| O  | 2.01359100  | 2.69252000  | 2.74549800  |
| O  | 4.77479600  | 0.57095200  | 1.33178800  |
| Cl | 5.42927000  | -1.00813500 | 1.46256700  |
| Cl | 0.35999900  | 3.14006900  | 2.88502600  |
| O  | -3.90123300 | -0.82001200 | -4.46778200 |
| Cl | -5.59351300 | -1.48278900 | -1.55690800 |

**TS<sub>32-33</sub>**

|    |             |             |             |
|----|-------------|-------------|-------------|
| Mn | -1.26849800 | 0.22773200  | 0.37039000  |
| O  | -2.03854000 | 0.05216200  | 2.02440900  |
| O  | -0.19683600 | 0.41299600  | -1.22321600 |
| N  | -1.42207900 | 2.27300000  | 0.57949200  |
| N  | -2.86869300 | 0.66530200  | -0.77227600 |
| N  | -1.95006800 | -1.64437600 | -0.15181000 |
| C  | -0.67869600 | 2.98222400  | 1.43027700  |
| H  | 0.02939300  | 2.42087700  | 2.03519300  |
| C  | -0.80399500 | 4.36341900  | 1.52555400  |
| H  | -0.17982900 | 4.91066700  | 2.22506300  |
| C  | -1.72532500 | 5.00825200  | 0.70912600  |
| H  | -1.84114100 | 6.08750500  | 0.75355500  |
| C  | -2.51479900 | 4.26117900  | -0.15963900 |
| H  | -3.25737000 | 4.74159700  | -0.78923300 |
| C  | -2.35359100 | 2.88070500  | -0.20000500 |
| C  | -3.15874100 | 1.95724200  | -1.00284200 |
| C  | -4.15642700 | 2.29064400  | -1.91616700 |



|                |             |             |             |
|----------------|-------------|-------------|-------------|
| H              | -4.40321700 | 3.32935800  | -2.11213700 |
| C              | -4.82687000 | 1.26212400  | -2.57104000 |
| H              | -5.60776400 | 1.50056000  | -3.28740600 |
| C              | -4.50408900 | -0.06799500 | -2.32097900 |
| H              | -5.02098100 | -0.87325800 | -2.83332400 |
| C              | -3.49336500 | -0.34354800 | -1.40278100 |
| C              | -3.00458900 | -1.66618100 | -1.00854000 |
| C              | -3.55857300 | -2.87445700 | -1.41527200 |
| H              | -4.39535800 | -2.88275900 | -2.10709500 |
| C              | -3.04067600 | -4.06198400 | -0.90687200 |
| H              | -3.46785600 | -5.01348600 | -1.21151700 |
| C              | -1.98132300 | -4.01814100 | -0.00955000 |
| H              | -1.54799000 | -4.92169300 | 0.40861300  |
| C              | -1.45224100 | -2.78099400 | 0.34185800  |
| H              | -0.59796000 | -2.68356200 | 1.00552100  |
| Mn             | 1.32072000  | -0.06230700 | -0.47263500 |
| O              | 3.06290700  | -0.44185000 | -2.47529800 |
| O              | 0.38234700  | -0.18820700 | 1.03566500  |
| N              | 1.25560100  | -2.05136200 | -1.02819600 |
| C              | 0.47342200  | -2.52070300 | -2.00357400 |
| H              | -0.18684500 | -1.79622700 | -2.47460600 |
| C              | 0.49566200  | -3.85972800 | -2.37286500 |
| H              | -0.15404300 | -4.20672300 | -3.17029000 |
| C              | 1.33950600  | -4.72584900 | -1.68695800 |
| H              | 1.36612200  | -5.78309200 | -1.93594100 |
| C              | 2.16959100  | -4.22805700 | -0.68731000 |
| H              | 2.86089000  | -4.88096000 | -0.16332400 |
| C              | 2.13342500  | -2.86991200 | -0.39045700 |
| C              | 3.03724100  | -2.18535700 | 0.54177600  |
| N              | 2.93262800  | -0.84823600 | 0.49086700  |
| N              | 2.29917200  | 1.61158700  | 0.19432800  |
| C              | 3.31595000  | 1.38786100  | 1.07319700  |
| C              | 3.64719400  | -0.02712300 | 1.27570500  |
| C              | 4.57933100  | -0.55964300 | 2.16445900  |
| C              | 4.72315300  | -1.94369800 | 2.21949800  |
| C              | 3.95404100  | -2.77514700 | 1.41045700  |
| H              | 4.05839300  | -3.85430300 | 1.46249000  |
| H              | 5.43980800  | -2.37982000 | 2.90954200  |
| H              | 5.17096900  | 0.08522400  | 2.80635600  |
| C              | 3.96830500  | 2.45288400  | 1.68318200  |
| H              | 4.77495500  | 2.26582900  | 2.38524000  |
| C              | 3.58590700  | 3.75364400  | 1.36983900  |
| H              | 4.08825900  | 4.59446400  | 1.84003900  |
| C              | 2.57185100  | 3.96383200  | 0.44463500  |
| H              | 2.25236400  | 4.96262100  | 0.16361800  |
| C              | 1.94492000  | 2.86048500  | -0.12280700 |
| H              | 1.14535200  | 2.95942000  | -0.85265200 |
| H              | -1.73137100 | -0.81926600 | 2.49864200  |
| H              | -3.57712300 | -0.32274800 | 1.76244400  |
| O              | 2.64922000  | -0.04298500 | -3.58587100 |
| H              | 2.29697800  | 2.00159700  | -2.65289100 |
| O              | -1.51524700 | -2.11458700 | 3.30386500  |
| O              | -4.55229700 | -0.59150200 | 1.63087900  |
| Cl             | -5.35404100 | 0.92281400  | 1.57818100  |
| Cl             | 0.17694300  | -2.35413800 | 3.46216500  |
| O              | 1.50762800  | 2.11997700  | -3.20050600 |
| Cl             | 5.23258300  | 2.32763400  | -1.94902000 |
| O <sub>2</sub> |             |             |             |
| O              | 0.00000000  | 0.00000000  | 0.60819000  |
| O              | 0.00000000  | 0.00000000  | -0.60819000 |

|    |             |             |             |
|----|-------------|-------------|-------------|
| Mn | 1.37112200  | 0.10823300  | -0.68964400 |
| O  | 1.89097600  | 0.40833800  | -2.29958000 |
| O  | 0.69975800  | -0.22867600 | 1.25838500  |
| N  | 1.81378300  | 2.05496400  | -0.08834000 |
| N  | 3.22646800  | -0.08777200 | 0.15861400  |
| N  | 1.81189300  | -1.90628500 | -0.96236500 |
| C  | 1.03737300  | 3.11436200  | -0.32886700 |
| H  | 0.12004000  | 2.91466600  | -0.87527900 |
| C  | 1.39079900  | 4.39516500  | 0.08361300  |
| H  | 0.72655800  | 5.22768500  | -0.12951300 |
| C  | 2.58480900  | 4.57074400  | 0.77106600  |
| H  | 2.88886400  | 5.55705400  | 1.11145400  |
| C  | 3.39613500  | 3.46805300  | 1.01813300  |
| H  | 4.33963100  | 3.57871500  | 1.54444000  |
| C  | 2.99166100  | 2.21485000  | 0.57026200  |
| C  | 3.77014200  | 0.98485800  | 0.75327300  |
| C  | 4.95437800  | 0.85840000  | 1.47882100  |
| H  | 5.40844200  | 1.72189200  | 1.95541000  |
| C  | 5.53124100  | -0.40262900 | 1.58872200  |
| H  | 6.45214700  | -0.52747100 | 2.15138800  |
| C  | 4.92838900  | -1.50973500 | 0.99895600  |
| H  | 5.36340500  | -2.49930000 | 1.10221900  |
| C  | 3.74845000  | -1.31928900 | 0.28131400  |
| C  | 2.96346900  | -2.35461000 | -0.40279100 |
| C  | 3.34190300  | -3.68840200 | -0.53172900 |
| H  | 4.25980400  | -4.04288100 | -0.07263900 |
| C  | 2.54431300  | -4.54933700 | -1.27758000 |
| H  | 2.82958900  | -5.59170700 | -1.39134600 |
| C  | 1.39368500  | -4.06088600 | -1.88727200 |
| H  | 0.75184400  | -4.69800700 | -2.48820500 |
| C  | 1.05691700  | -2.72648900 | -1.69760300 |
| H  | 0.15913800  | -2.28774400 | -2.12827500 |
| Mn | -0.97682200 | -0.28887200 | 0.78827000  |
| O  | -1.36827400 | -0.58691300 | 2.69234800  |
| O  | -0.42111700 | 0.04691800  | -0.93844200 |
| N  | -1.25131500 | -2.31556700 | 0.48043500  |
| C  | -0.42584900 | -3.25045900 | 0.95891500  |
| H  | 0.45282800  | -2.88453500 | 1.48526700  |
| C  | -0.66935000 | -4.60604500 | 0.77786000  |
| H  | 0.02826700  | -5.33534400 | 1.17811100  |
| C  | -1.79975100 | -4.99025600 | 0.06581000  |
| H  | -2.01471300 | -6.04163500 | -0.10509300 |
| C  | -2.66781600 | -4.01700800 | -0.41787200 |
| H  | -3.57222000 | -4.29493100 | -0.95097200 |
| C  | -2.38193600 | -2.67504700 | -0.18391900 |
| C  | -3.25516500 | -1.55389100 | -0.55871000 |
| N  | -2.85854400 | -0.38392000 | -0.03974500 |
| N  | -1.70702600 | 1.65272400  | 1.02135600  |
| C  | -2.87505000 | 1.92427600  | 0.38168500  |
| C  | -3.50182000 | 0.76802500  | -0.27254400 |
| C  | -4.65493100 | 0.77671100  | -1.05621700 |
| C  | -5.09504500 | -0.42944900 | -1.59366500 |
| C  | -4.39899600 | -1.61113600 | -1.35418100 |
| H  | -4.73343400 | -2.54944100 | -1.78578700 |
| H  | -5.98717300 | -0.44779000 | -2.21341300 |
| H  | -5.19222100 | 1.70029800  | -1.24889100 |
| C  | -3.41974200 | 3.20399500  | 0.41330400  |
| H  | -4.34713000 | 3.41397600  | -0.11109800 |
| C  | -2.77319800 | 4.19841600  | 1.14054200  |
| H  | -3.18838700 | 5.20188000  | 1.17614100  |
| C  | -1.60730300 | 3.89071300  | 1.83086700  |
| H  | -1.08016200 | 4.63411000  | 2.42104700  |
| C  | -1.10017400 | 2.59962400  | 1.73939500  |

|    |             |             |             |
|----|-------------|-------------|-------------|
| H  | -0.17882500 | 2.30596100  | 2.23780900  |
| O  | 0.60546100  | 1.92678300  | -3.03402700 |
| Cl | -0.61528700 | 3.41390000  | -3.71801600 |
| Cl | -3.02531600 | -0.79691200 | 3.10124600  |

**35**

|    |             |             |             |
|----|-------------|-------------|-------------|
| Mn | -1.26455300 | 0.00673600  | -0.74638600 |
| O  | -1.85983400 | 0.14483600  | -2.65438700 |
| O  | -0.51494500 | 0.00965300  | 1.01506700  |
| N  | -2.04462900 | -2.14058800 | -0.70307900 |
| N  | -3.31419300 | 0.01144900  | 0.12136300  |
| N  | -2.06993200 | 2.16257400  | -0.73692600 |
| C  | -1.36469400 | -3.17835700 | -1.19559200 |
| H  | -0.48114400 | -2.93497400 | -1.78538800 |
| C  | -1.74045100 | -4.49914600 | -0.97490000 |
| H  | -1.15356500 | -5.31075900 | -1.39533600 |
| C  | -2.86566300 | -4.73992200 | -0.19505100 |
| H  | -3.18844600 | -5.75663100 | 0.01417300  |
| C  | -3.58260400 | -3.66386300 | 0.31604300  |
| H  | -4.46747200 | -3.83712500 | 0.92110900  |
| C  | -3.15019700 | -2.36673800 | 0.03715300  |
| C  | -3.86044000 | -1.15689700 | 0.49800500  |
| C  | -5.02872900 | -1.19012800 | 1.26244900  |
| H  | -5.47234400 | -2.13434900 | 1.56210800  |
| C  | -5.61601900 | 0.01174000  | 1.63594600  |
| H  | -6.52515300 | 0.01173100  | 2.23125600  |
| C  | -5.03808700 | 1.21368800  | 1.24798600  |
| H  | -5.48912500 | 2.15839700  | 1.53495000  |
| C  | -3.86960900 | 1.18017300  | 0.48438400  |
| C  | -3.17029300 | 2.39075300  | 0.00834900  |
| C  | -3.60721400 | 3.68898700  | 0.27547000  |
| H  | -4.48737100 | 3.86592200  | 0.88637400  |
| C  | -2.89960900 | 4.76175600  | -0.25565500 |
| H  | -3.22555000 | 5.77948100  | -0.05648000 |
| C  | -1.78110200 | 4.51740300  | -1.04459300 |
| H  | -1.20451100 | 5.32707000  | -1.48271600 |
| C  | -1.40078500 | 3.19573900  | -1.25145700 |
| H  | -0.52353900 | 2.94663500  | -1.84933600 |
| Mn | 1.18397400  | 0.02130300  | 0.47662500  |
| O  | 1.62286800  | 0.02473400  | 2.40723400  |
| O  | 0.54939700  | 0.02335700  | -1.22122700 |
| N  | 1.65839700  | 2.03510100  | 0.42195500  |
| C  | 0.87531500  | 2.99596100  | 0.91848200  |
| H  | -0.05701800 | 2.66630200  | 1.37192700  |
| C  | 1.23095400  | 4.33832400  | 0.85453600  |
| H  | 0.56434700  | 5.08982400  | 1.26646300  |
| C  | 2.43539000  | 4.68152500  | 0.25261400  |
| H  | 2.74121500  | 5.72170700  | 0.18194400  |
| C  | 3.25666000  | 3.67920800  | -0.25272000 |
| H  | 4.21110700  | 3.92246400  | -0.71001300 |
| C  | 2.84992000  | 2.35252900  | -0.15102500 |
| C  | 3.64084100  | 1.19860700  | -0.59565600 |
| N  | 3.07748200  | 0.02153800  | -0.28711400 |
| N  | 1.66709500  | -1.99048300 | 0.44373800  |
| C  | 2.86525900  | -2.30845700 | -0.11423700 |
| C  | 3.64848300  | -1.15669700 | -0.57712400 |
| C  | 4.87560600  | -1.19018900 | -1.23837400 |
| C  | 5.47577100  | 0.01897500  | -1.57792100 |
| C  | 4.86746000  | 1.22937300  | -1.25832800 |
| H  | 5.33618700  | 2.17253800  | -1.52110600 |
| H  | 6.43038800  | 0.01785300  | -2.09647600 |
| H  | 5.35145300  | -2.13420700 | -1.48465000 |
| C  | 3.28649200  | -3.63277800 | -0.18214600 |

|    |             |             |             |
|----|-------------|-------------|-------------|
| H  | 4.24584200  | -3.87697900 | -0.62845800 |
| C  | 2.47363600  | -4.63129400 | 0.34392700  |
| H  | 2.79109200  | -5.66949800 | 0.30048600  |
| C  | 1.26317000  | -4.28662700 | 0.93272000  |
| H  | 0.60304900  | -5.03481500 | 1.36085100  |
| C  | 0.89293700  | -2.94707900 | 0.96195700  |
| H  | -0.04413200 | -2.61590600 | 1.40434000  |
| O  | -1.35079800 | -0.76257300 | -3.44342900 |
| Cl | 3.28774800  | -0.01954500 | 2.82829000  |

**<sup>35</sup>**

|    |             |             |             |
|----|-------------|-------------|-------------|
| Mn | -1.27263600 | 0.00234200  | -0.72136500 |
| O  | -1.82183600 | 0.09777300  | -2.73162900 |
| O  | -0.52775500 | 0.01440600  | 1.02523300  |
| N  | -2.10555300 | -2.13242300 | -0.66180700 |
| N  | -3.28531500 | 0.09424000  | 0.11418000  |
| N  | -1.97408200 | 2.18588600  | -0.81082800 |
| C  | -1.45914600 | -3.20992500 | -1.11193900 |
| H  | -0.56634800 | -3.01777500 | -1.70644500 |
| C  | -1.88125100 | -4.50814700 | -0.84573000 |
| H  | -1.32168400 | -5.35390100 | -1.23504400 |
| C  | -3.01717100 | -4.68226200 | -0.06349400 |
| H  | -3.37539300 | -5.67924400 | 0.18015100  |
| C  | -3.69887900 | -3.56483400 | 0.40524200  |
| H  | -4.58982500 | -3.68632600 | 1.01397600  |
| C  | -3.22160700 | -2.29437100 | 0.07952800  |
| C  | -3.89199600 | -1.04548000 | 0.49263300  |
| C  | -5.08490100 | -1.01430400 | 1.21747100  |
| H  | -5.58044300 | -1.93286400 | 1.51447300  |
| C  | -5.63236600 | 0.21735400  | 1.55155600  |
| H  | -6.56048500 | 0.26620900  | 2.11454400  |
| C  | -4.99234800 | 1.38695400  | 1.16314600  |
| H  | -5.41486100 | 2.35387300  | 1.41702800  |
| C  | -3.80312500 | 1.29358700  | 0.43772800  |
| C  | -3.04524500 | 2.46736900  | -0.04027900 |
| C  | -3.40286400 | 3.78478400  | 0.24944200  |
| H  | -4.25570000 | 4.00282900  | 0.88534900  |
| C  | -2.65012500 | 4.82229800  | -0.28970800 |
| H  | -2.91375500 | 5.85429200  | -0.07260200 |
| C  | -1.56657000 | 4.52429200  | -1.10840500 |
| H  | -0.95688700 | 5.30552000  | -1.55335400 |
| C  | -1.26070300 | 3.18609800  | -1.33145800 |
| H  | -0.40903900 | 2.89578800  | -1.94724700 |
| Mn | 1.17296000  | -0.01219700 | 0.48684400  |
| O  | 1.61306800  | -0.01511200 | 2.41210700  |
| O  | 0.51351400  | -0.01786200 | -1.20850200 |
| N  | 1.65480200  | 1.99856600  | 0.44204900  |
| C  | 0.88358100  | 2.95768800  | 0.96002500  |
| H  | -0.05163700 | 2.62935600  | 1.40863500  |
| C  | 1.25486800  | 4.29677500  | 0.92318300  |
| H  | 0.59843500  | 5.04697700  | 1.35349100  |
| C  | 2.46038000  | 4.63862900  | 0.32278700  |
| H  | 2.77785500  | 5.67650000  | 0.27247200  |
| C  | 3.26810900  | 3.63781100  | -0.20694500 |
| H  | 4.22300600  | 3.87985200  | -0.66385500 |
| C  | 2.84794100  | 2.31385500  | -0.12853100 |
| C  | 3.62638600  | 1.15981400  | -0.59297900 |
| N  | 3.05722000  | -0.01692800 | -0.29287800 |
| N  | 1.64562300  | -2.02499900 | 0.44070700  |
| C  | 2.82941600  | -2.34709300 | -0.14496300 |
| C  | 3.61595500  | -1.19602600 | -0.60353700 |
| C  | 4.83565600  | -1.23039000 | -1.27826400 |
| C  | 5.44245700  | -0.02172700 | -1.60748800 |

|    |             |             |             |
|----|-------------|-------------|-------------|
| C  | 4.84730800  | 1.18928500  | -1.26598100 |
| H  | 5.32186200  | 2.13184700  | -1.52005600 |
| H  | 6.39187900  | -0.02362300 | -2.13547900 |
| H  | 5.30041400  | -2.17501300 | -1.54271700 |
| C  | 3.23341900  | -3.67484500 | -0.24251800 |
| H  | 4.18078600  | -3.92267600 | -0.71186800 |
| C  | 2.41852500  | -4.67227700 | 0.28282600  |
| H  | 2.72205700  | -5.71333300 | 0.21521100  |
| C  | 1.22434400  | -4.32335900 | 0.90165100  |
| H  | 0.56419600  | -5.07092400 | 1.33072900  |
| C  | 0.87034100  | -2.98021500 | 0.95930000  |
| H  | -0.05440800 | -2.64561200 | 1.42421200  |
| O  | -1.34125600 | -0.91851700 | -3.41979900 |
| Cl | 3.27792800  | -0.07407700 | 2.82802000  |

**36**

|    |             |             |             |
|----|-------------|-------------|-------------|
| Mn | -1.29240900 | 0.06375600  | -0.61113500 |
| O  | -1.94828800 | 0.19676200  | -2.50995400 |
| O  | -0.66952100 | 0.14807000  | 1.13685000  |
| N  | -2.03486100 | -2.16467200 | -0.46344500 |
| N  | -3.37982800 | 0.02688700  | 0.21232500  |
| N  | -2.16174900 | 2.22581700  | -0.63374400 |
| C  | -1.30042900 | -3.22048900 | -0.82159400 |
| H  | -0.38178700 | -2.99951400 | -1.36629100 |
| C  | -1.66265500 | -4.53075900 | -0.52785800 |
| H  | -1.03144500 | -5.35664700 | -0.84393700 |
| C  | -2.84056900 | -4.74152400 | 0.18015800  |
| H  | -3.16038900 | -5.74796300 | 0.43849100  |
| C  | -3.61150700 | -3.64815200 | 0.55749100  |
| H  | -4.53353900 | -3.80042600 | 1.11032000  |
| C  | -3.18341300 | -2.36325500 | 0.21445500  |
| C  | -3.94409600 | -1.14411100 | 0.56058100  |
| C  | -5.17791400 | -1.18383000 | 1.21519000  |
| H  | -5.63431900 | -2.12900700 | 1.49005600  |
| C  | -5.81815400 | 0.01076800  | 1.51270200  |
| H  | -6.77953500 | 0.00360600  | 2.01936900  |
| C  | -5.22394300 | 1.21443400  | 1.16018600  |
| H  | -5.71666700 | 2.15405300  | 1.38796800  |
| C  | -3.98999100 | 1.18993400  | 0.50632700  |
| C  | -3.27772600 | 2.41821800  | 0.09673900  |
| C  | -3.71244000 | 3.70276500  | 0.43065600  |
| H  | -4.60591000 | 3.85077100  | 1.02999500  |
| C  | -2.98186300 | 4.79943900  | -0.01259100 |
| H  | -3.30533100 | 5.80609300  | 0.24021700  |
| C  | -1.83978100 | 4.59305500  | -0.77881100 |
| H  | -1.24275100 | 5.42258100  | -1.14714700 |
| C  | -1.46729100 | 3.28275100  | -1.05930500 |
| H  | -0.57544600 | 3.06058800  | -1.64652400 |
| Mn | 1.12362600  | 0.04198700  | 0.67458700  |
| O  | 1.48912900  | 0.13346500  | 2.64404000  |
| O  | 0.49411800  | -0.05008600 | -1.06668300 |
| N  | 1.88047400  | 2.26026000  | 0.49330800  |
| C  | 1.16276600  | 3.31923000  | 0.87265000  |
| H  | 0.25678000  | 3.10173700  | 1.44004300  |
| C  | 1.52873500  | 4.62729400  | 0.57307500  |
| H  | 0.91249700  | 5.45822400  | 0.90508200  |
| C  | 2.69188400  | 4.82916100  | -0.16189800 |
| H  | 3.01304000  | 5.83349300  | -0.42673200 |
| C  | 3.44812200  | 3.73096200  | -0.55553500 |
| H  | 4.36037200  | 3.87737500  | -1.12609500 |
| C  | 3.01761700  | 2.44917000  | -0.20425900 |
| C  | 3.76266300  | 1.22145800  | -0.55538200 |
| N  | 3.19282900  | 0.05758900  | -0.19296000 |

|    |             |             |             |
|----|-------------|-------------|-------------|
| N  | 1.96532100  | -2.12496400 | 0.68022200  |
| C  | 3.08446900  | -2.33184500 | -0.04139300 |
| C  | 3.79626100  | -1.11125300 | -0.47563600 |
| C  | 5.02641400  | -1.14905900 | -1.13677400 |
| C  | 5.62343500  | 0.04715600  | -1.50915700 |
| C  | 4.99113900  | 1.24823000  | -1.22053800 |
| H  | 5.45029800  | 2.18838800  | -1.50799700 |
| H  | 6.58133400  | 0.04343500  | -2.02244500 |
| H  | 5.51487000  | -2.09346900 | -1.35382900 |
| C  | 3.52450500  | -3.62298800 | -0.34232600 |
| H  | 4.41856000  | -3.78357700 | -0.93757800 |
| C  | 2.79847100  | -4.71097100 | 0.12890300  |
| H  | 3.12645600  | -5.72238900 | -0.09775800 |
| C  | 1.65525300  | -4.48959100 | 0.88900900  |
| H  | 1.06161300  | -5.31171400 | 1.27885300  |
| C  | 1.27584600  | -3.17374700 | 1.13256800  |
| H  | 0.38083000  | -2.94059000 | 1.71092900  |
| Cl | 3.16472700  | 0.07971400  | 3.06003400  |
| Cl | -1.35199700 | -1.05179800 | -3.54421400 |

### 38

|    |             |             |             |
|----|-------------|-------------|-------------|
| Mn | -1.37562600 | 0.19204500  | -0.79137300 |
| O  | -0.85838600 | -0.08114700 | 1.18958700  |
| N  | -2.00730000 | -1.78884200 | -0.92234300 |
| N  | -3.25204000 | 0.25490300  | 0.01255100  |
| N  | -1.62312400 | 2.20413500  | -0.37857900 |
| C  | -1.31908100 | -2.74165900 | -1.55382900 |
| H  | -0.37228700 | -2.43611500 | -1.99369300 |
| C  | -1.78375900 | -4.04909600 | -1.62990800 |
| H  | -1.19413200 | -4.79965800 | -2.14746200 |
| C  | -2.99146000 | -4.36326100 | -1.01723800 |
| H  | -3.37638400 | -5.37900900 | -1.04437800 |
| C  | -3.71657300 | -3.36320600 | -0.37769300 |
| H  | -4.67269300 | -3.58257500 | 0.08795500  |
| C  | -3.20936100 | -2.06739200 | -0.35806800 |
| C  | -3.89687000 | -0.90532900 | 0.21635300  |
| C  | -5.09914600 | -0.91667100 | 0.92132200  |
| H  | -5.63616100 | -1.84453000 | 1.09024900  |
| C  | -5.59010100 | 0.28884200  | 1.41364100  |
| H  | -6.52596000 | 0.30321400  | 1.96500700  |
| C  | -4.88594600 | 1.47287600  | 1.22014000  |
| H  | -5.25620000 | 2.41269500  | 1.61824400  |
| C  | -3.68620800 | 1.42279800  | 0.51175900  |
| C  | -2.78422400 | 2.54690300  | 0.23728600  |
| C  | -3.06068600 | 3.87734900  | 0.53505200  |
| H  | -3.98547500 | 4.14007100  | 1.03985900  |
| C  | -2.14867500 | 4.85924800  | 0.16226800  |
| H  | -2.35542700 | 5.90301300  | 0.38221300  |
| C  | -0.98400500 | 4.49341700  | -0.50101200 |
| H  | -0.24982800 | 5.22910500  | -0.81477600 |
| C  | -0.75294300 | 3.14519400  | -0.74938400 |
| H  | 0.14850600  | 2.79473800  | -1.24780300 |
| Mn | 0.84284500  | -0.28425400 | 0.85629700  |
| O  | 1.13101900  | -0.52106100 | 2.75806200  |
| O  | 0.37707500  | -0.04595500 | -0.92763200 |
| N  | 1.62026600  | 1.64023300  | 1.00595400  |
| C  | 1.01608800  | 2.63960500  | 1.65258700  |
| H  | 0.06060100  | 2.40269000  | 2.11596900  |
| C  | 1.56740300  | 3.91390200  | 1.71303500  |
| H  | 1.04232300  | 4.70110500  | 2.24521700  |
| C  | 2.77266600  | 4.14944200  | 1.06298200  |
| H  | 3.22261500  | 5.13837200  | 1.07368700  |
| C  | 3.41202400  | 3.10261000  | 0.40698200  |

|    |             |             |             |
|----|-------------|-------------|-------------|
| H  | 4.36652000  | 3.25837900  | -0.08691000 |
| C  | 2.82431000  | 1.84146200  | 0.40747400  |
| C  | 3.43248900  | 0.63617700  | -0.17258400 |
| N  | 2.74244600  | -0.48125000 | 0.09022300  |
| N  | 1.03945100  | -2.32221600 | 0.63907200  |
| C  | 2.17036200  | -2.75352300 | 0.01820100  |
| C  | 3.10100200  | -1.68623400 | -0.37404200 |
| C  | 4.25888200  | -1.81857300 | -1.13894000 |
| C  | 5.00628100  | -0.67429700 | -1.40666200 |
| C  | 4.60239800  | 0.56896800  | -0.92890300 |
| H  | 5.17807400  | 1.46291600  | -1.14919500 |
| H  | 5.91019200  | -0.75225400 | -2.00421100 |
| H  | 4.56691300  | -2.78483500 | -1.52637100 |
| C  | 2.40294200  | -4.11343300 | -0.16145400 |
| H  | 3.30836400  | -4.44934600 | -0.65798800 |
| C  | 1.48062700  | -5.03055600 | 0.33130600  |
| H  | 1.65403500  | -6.09564900 | 0.20434800  |
| C  | 0.35033400  | -4.57309300 | 0.99844300  |
| H  | -0.38894000 | -5.25663500 | 1.40447300  |
| C  | 0.16143600  | -3.20256700 | 1.12655100  |
| H  | -0.71342600 | -2.78278500 | 1.61781400  |
| O  | -1.74046300 | 0.45777300  | -2.40825900 |
| Cl | 2.74523300  | -0.82844100 | 3.23869700  |
| O  | 0.32192600  | 1.60037200  | -3.60591300 |
| Cl | 1.91358000  | 1.81046100  | -3.14247600 |

**TS<sub>38-39</sub>**

|    |             |             |             |
|----|-------------|-------------|-------------|
| Mn | -1.36014500 | 0.07495200  | -0.64784700 |
| O  | -0.72176300 | -0.14956700 | 1.23822500  |
| N  | -1.78658400 | -1.95495400 | -0.84918200 |
| N  | -3.22923300 | -0.09050900 | 0.15110100  |
| N  | -1.82871900 | 2.04701900  | -0.21807100 |
| C  | -1.00744800 | -2.81009000 | -1.51569800 |
| H  | -0.11041400 | -2.38922500 | -1.96464300 |
| C  | -1.32204700 | -4.15978400 | -1.61482400 |
| H  | -0.66271900 | -4.82634200 | -2.16231100 |
| C  | -2.47138700 | -4.62368000 | -0.98447200 |
| H  | -2.73740800 | -5.67631500 | -1.02712900 |
| C  | -3.29119100 | -3.72709900 | -0.30742300 |
| H  | -4.20588300 | -4.06287000 | 0.17193200  |
| C  | -2.93646700 | -2.38220300 | -0.26829700 |
| C  | -3.74117800 | -1.31731500 | 0.33963500  |
| C  | -4.93133400 | -1.47170200 | 1.04804800  |
| H  | -5.36323000 | -2.45612300 | 1.19947300  |
| C  | -5.54785000 | -0.33535100 | 1.56313000  |
| H  | -6.47471900 | -0.43315600 | 2.12111400  |
| C  | -4.98042600 | 0.92235200  | 1.38313900  |
| H  | -5.44694000 | 1.80836100  | 1.80244200  |
| C  | -3.78958200 | 1.01560300  | 0.66432500  |
| C  | -3.02740100 | 2.23947000  | 0.39460000  |
| C  | -3.46832700 | 3.52148800  | 0.70411000  |
| H  | -4.42857400 | 3.66347600  | 1.19075100  |
| C  | -2.67470000 | 4.61217200  | 0.36351300  |
| H  | -3.00758300 | 5.62009700  | 0.59573800  |
| C  | -1.46265900 | 4.39855000  | -0.28028900 |
| H  | -0.81356900 | 5.22146800  | -0.56364000 |
| C  | -1.07138400 | 3.09275100  | -0.55559300 |
| H  | -0.13083100 | 2.86627900  | -1.05060600 |
| Mn | 0.98280000  | -0.16788100 | 0.82043800  |
| O  | 1.36001900  | -0.33348500 | 2.72250800  |
| O  | 0.40843200  | 0.06398600  | -0.92936500 |
| N  | 1.61362500  | 1.81955400  | 0.93184600  |
| C  | 0.97168800  | 2.77444300  | 1.60634400  |

|    |             |             |             |
|----|-------------|-------------|-------------|
| H  | 0.06816000  | 2.46847400  | 2.12913600  |
| C  | 1.42359000  | 4.08920000  | 1.62272700  |
| H  | 0.87120900  | 4.83959000  | 2.17987400  |
| C  | 2.56661500  | 4.40922000  | 0.90059400  |
| H  | 2.93750000  | 5.43022700  | 0.87750600  |
| C  | 3.24951000  | 3.40630600  | 0.21922300  |
| H  | 4.16211300  | 3.62795200  | -0.32593400 |
| C  | 2.76348900  | 2.10366700  | 0.26519900  |
| C  | 3.44200800  | 0.93855200  | -0.31667700 |
| N  | 2.85486200  | -0.22675600 | -0.00886600 |
| N  | 1.33504300  | -2.18941100 | 0.63722500  |
| C  | 2.47798500  | -2.54041300 | -0.01133900 |
| C  | 3.30678700  | -1.40952700 | -0.44810900 |
| C  | 4.45811900  | -1.46499000 | -1.23236100 |
| C  | 5.09593500  | -0.26941500 | -1.55180400 |
| C  | 4.59452300  | 0.94851200  | -1.10087900 |
| H  | 5.08627300  | 1.88103700  | -1.35947000 |
| H  | 5.99115800  | -0.28652500 | -2.16699700 |
| H  | 4.84208400  | -2.41306400 | -1.59551300 |
| C  | 2.80679500  | -3.88130900 | -0.18422600 |
| H  | 3.71885400  | -4.15311100 | -0.70727800 |
| C  | 1.96939200  | -4.85902800 | 0.34295700  |
| H  | 2.21770200  | -5.90960800 | 0.21948500  |
| C  | 0.82550100  | -4.48002700 | 1.03612000  |
| H  | 0.15045900  | -5.21264000 | 1.46759100  |
| C  | 0.53733600  | -3.12630000 | 1.15681200  |
| H  | -0.35377200 | -2.76590800 | 1.66542300  |
| O  | -1.85917700 | 0.29766500  | -2.30910300 |
| Cl | 3.01363700  | -0.47266000 | 3.14492800  |
| O  | -0.91308200 | 1.60901500  | -3.17383800 |
| Cl | 0.84636500  | 1.88803200  | -3.81189300 |

### 39

|    |             |             |             |
|----|-------------|-------------|-------------|
| Mn | -1.32819100 | -0.00627200 | -0.65810000 |
| O  | -0.58032800 | -0.01808300 | 1.08760800  |
| N  | -1.86933400 | -2.03794900 | -0.68887700 |
| N  | -3.19604400 | -0.00388500 | 0.16451700  |
| N  | -1.84891400 | 2.02406000  | -0.65610200 |
| C  | -1.15530200 | -2.99605500 | -1.28321200 |
| H  | -0.26293300 | -2.67121400 | -1.81446000 |
| C  | -1.52808700 | -4.33357000 | -1.21571200 |
| H  | -0.92338300 | -5.08659100 | -1.71165500 |
| C  | -2.66667700 | -4.67034400 | -0.49341100 |
| H  | -2.97985400 | -5.70734900 | -0.40939900 |
| C  | -3.41661100 | -3.66787600 | 0.11454800  |
| H  | -4.32102200 | -3.90997600 | 0.66443100  |
| C  | -3.00419700 | -2.34499300 | -0.00909200 |
| C  | -3.74123000 | -1.18404400 | 0.50585800  |
| C  | -4.91258900 | -1.21372600 | 1.26067800  |
| H  | -5.36927900 | -2.15663300 | 1.54381700  |
| C  | -5.48287400 | -0.00432100 | 1.64703800  |
| H  | -6.39457200 | -0.00461800 | 2.23766700  |
| C  | -4.89738500 | 1.20523900  | 1.28548800  |
| H  | -5.34114700 | 2.14834200  | 1.58807400  |
| C  | -3.72657500 | 1.17582700  | 0.52983100  |
| C  | -2.97471700 | 2.33604000  | 0.03625300  |
| C  | -3.36434500 | 3.66281400  | 0.18692700  |
| H  | -4.26367200 | 3.90867600  | 0.74352900  |
| C  | -2.59890100 | 4.66433900  | -0.40352700 |
| H  | -2.89295300 | 5.70482300  | -0.29631400 |
| C  | -1.46851600 | 4.32290700  | -1.13609700 |
| H  | -0.85010900 | 5.07562900  | -1.61533200 |
| C  | -1.11943400 | 2.98025900  | -1.23248500 |



|    |             |             |             |
|----|-------------|-------------|-------------|
| H  | -0.23296100 | 2.65120600  | -1.77099800 |
| Mn | 1.11336200  | -0.02834200 | 0.56492700  |
| O  | 1.55680200  | -0.02867000 | 2.45577400  |
| O  | 0.38271200  | -0.01874000 | -1.16517900 |
| N  | 1.59438500  | 1.97081100  | 0.51388000  |
| C  | 0.86911400  | 2.92021600  | 1.10959400  |
| H  | -0.03125000 | 2.58632000  | 1.62050800  |
| C  | 1.24209400  | 4.25831200  | 1.06402800  |
| H  | 0.62567700  | 5.00353600  | 1.55722800  |
| C  | 2.39415100  | 4.60645100  | 0.36900900  |
| H  | 2.70766500  | 5.64475300  | 0.30572100  |
| C  | 3.15662000  | 3.61247500  | -0.23629400 |
| H  | 4.07363700  | 3.85809600  | -0.76342200 |
| C  | 2.74350400  | 2.28799100  | -0.13895700 |
| C  | 3.48960900  | 1.13392600  | -0.65090700 |
| N  | 2.94015100  | -0.04201600 | -0.31053400 |
| N  | 1.56339700  | -2.03485400 | 0.50506800  |
| C  | 2.69922300  | -2.36942100 | -0.16241300 |
| C  | 3.46749800  | -1.22459900 | -0.66281000 |
| C  | 4.64435600  | -1.26282900 | -1.40863800 |
| C  | 5.23672600  | -0.05591800 | -1.77025500 |
| C  | 4.66734400  | 1.15819500  | -1.39586300 |
| H  | 5.12873100  | 2.09910300  | -1.67821600 |
| H  | 6.15392300  | -0.06179400 | -2.35227100 |
| H  | 5.08780500  | -2.20915300 | -1.70155400 |
| C  | 3.07771700  | -3.70215000 | -0.28538800 |
| H  | 3.98467600  | -3.96202300 | -0.82295200 |
| C  | 2.29288400  | -4.68713400 | 0.30617500  |
| H  | 2.57854300  | -5.73190900 | 0.22106800  |
| C  | 1.15367800  | -4.32250600 | 1.01385600  |
| H  | 0.51990800  | -5.06076900 | 1.49541300  |
| C  | 0.81611000  | -2.97624900 | 1.08650300  |
| H  | -0.07319000 | -2.62871100 | 1.60744400  |
| O  | -1.98791300 | -0.03245200 | -2.64631800 |
| Cl | 3.22185400  | 0.06409100  | 2.83970400  |
| O  | -1.36748000 | 0.76011400  | -3.41613500 |

**TS<sub>22B</sub>**

|    |             |             |             |
|----|-------------|-------------|-------------|
| Mn | -1.41339200 | -0.07462500 | -0.54433600 |
| O  | -0.88018600 | 0.15995800  | 1.30301300  |
| N  | -1.61545700 | -2.11030300 | -0.27975200 |
| N  | -3.32252700 | -0.24505500 | 0.10811100  |
| N  | -2.10440700 | 1.87402300  | -0.66044100 |
| C  | -0.70012900 | -3.00507000 | -0.66189000 |
| H  | 0.21520400  | -2.60089800 | -1.08884000 |
| C  | -0.89843200 | -4.37123300 | -0.50585900 |
| H  | -0.12713200 | -5.06467200 | -0.82756900 |
| C  | -2.07897600 | -4.81109800 | 0.08242700  |
| H  | -2.26030400 | -5.87177800 | 0.23351300  |
| C  | -3.03845800 | -3.88085200 | 0.46577300  |
| H  | -3.97660000 | -4.20279100 | 0.90785900  |
| C  | -2.79355400 | -2.52632500 | 0.25698200  |
| C  | -3.74767200 | -1.44843300 | 0.53229100  |
| C  | -4.98820100 | -1.57080000 | 1.15743900  |
| H  | -5.34372800 | -2.53857000 | 1.49813800  |
| C  | -5.75301500 | -0.42437400 | 1.34492900  |
| H  | -6.72019400 | -0.49536200 | 1.83441300  |
| C  | -5.28321300 | 0.81581200  | 0.92136700  |
| H  | -5.87086900 | 1.71445800  | 1.08170000  |
| C  | -4.03796600 | 0.87803200  | 0.29898900  |
| C  | -3.36472200 | 2.08325300  | -0.19696700 |
| C  | -3.93230300 | 3.35330000  | -0.23629600 |
| H  | -4.93776400 | 3.51272500  | 0.14134800  |

|    |             |             |             |
|----|-------------|-------------|-------------|
| C  | -3.20266900 | 4.40640400  | -0.77728900 |
| H  | -3.63477100 | 5.40260900  | -0.81578200 |
| C  | -1.92722000 | 4.16884600  | -1.27547600 |
| H  | -1.32795200 | 4.96162700  | -1.71287000 |
| C  | -1.41008000 | 2.88125400  | -1.19516800 |
| H  | -0.41237800 | 2.63734300  | -1.55449200 |
| Mn | 0.85674800  | 0.36180900  | 0.96252600  |
| O  | 1.10017900  | 0.59997700  | 2.88892600  |
| O  | 0.34407500  | 0.16508600  | -0.82714600 |
| N  | 1.31023800  | 2.41924000  | 0.66428900  |
| C  | 0.54849800  | 3.42095300  | 1.10824800  |
| H  | -0.34048100 | 3.13542200  | 1.66728800  |
| C  | 0.86202400  | 4.75230100  | 0.85985100  |
| H  | 0.21258400  | 5.53808400  | 1.23342100  |
| C  | 2.00282200  | 5.03772000  | 0.11903300  |
| H  | 2.27446300  | 6.06589000  | -0.10446100 |
| C  | 2.80769700  | 3.99428100  | -0.32605700 |
| H  | 3.71785000  | 4.19754100  | -0.88248200 |
| C  | 2.44616300  | 2.68291800  | -0.02856300 |
| C  | 3.24918000  | 1.50232800  | -0.38586900 |
| N  | 2.81129600  | 0.36060400  | 0.16682900  |
| N  | 1.56905900  | -1.67844900 | 1.18188100  |
| C  | 2.74341000  | -1.96426700 | 0.57202300  |
| C  | 3.40154200  | -0.81878700 | -0.07477800 |
| C  | 4.53637900  | -0.88686100 | -0.88470900 |
| C  | 5.01378100  | 0.28860800  | -1.45442000 |
| C  | 4.37137600  | 1.49935200  | -1.21420000 |
| H  | 4.73093200  | 2.41589600  | -1.67146300 |
| H  | 5.88748800  | 0.25975500  | -2.09958600 |
| H  | 5.02497200  | -1.83697800 | -1.08007700 |
| C  | 3.26867700  | -3.25404000 | 0.60094200  |
| H  | 4.20209200  | -3.47617900 | 0.09196000  |
| C  | 2.59357700  | -4.24192700 | 1.31006800  |
| H  | 2.99260100  | -5.25206300 | 1.34813700  |
| C  | 1.41654700  | -3.92069400 | 1.97674400  |
| H  | 0.86576900  | -4.66072800 | 2.54959900  |
| C  | 0.93045700  | -2.62234300 | 1.87495100  |
| H  | -0.00568000 | -2.32126500 | 2.34304500  |
| O  | -1.84581800 | -0.33138300 | -2.26992700 |
| Cl | 2.72205100  | 0.87615500  | 3.37308600  |
| O  | -0.61485100 | 0.30952700  | -3.34713600 |
| H  | -0.00760700 | 0.52875300  | -2.60304100 |
| H  | 0.05845600  | -1.15376600 | -3.61762000 |
| O  | 0.51334200  | -2.05987300 | -3.71376800 |
| Cl | 2.04351900  | -1.77444700 | -2.98791500 |

**TS<sub>22A</sub>**

|    |             |             |             |
|----|-------------|-------------|-------------|
| Mn | -1.42268100 | -0.01644100 | -0.65717600 |
| O  | -0.74858600 | 0.05790500  | 1.04798000  |
| N  | -1.76169600 | -2.04256700 | -0.58672400 |
| N  | -3.29428800 | -0.10317000 | 0.08758900  |
| N  | -1.97870700 | 1.97413000  | -0.61566900 |
| C  | -0.93435600 | -2.95882100 | -1.09601300 |
| H  | -0.01610500 | -2.58233700 | -1.54145000 |
| C  | -1.22506400 | -4.31701500 | -1.04440100 |
| H  | -0.52464100 | -5.03085900 | -1.46676700 |
| C  | -2.40547000 | -4.72368900 | -0.43465200 |
| H  | -2.65803500 | -5.77829500 | -0.36860400 |
| C  | -3.27427300 | -3.76742300 | 0.08087000  |
| H  | -4.21422100 | -4.06110100 | 0.53838000  |
| C  | -2.93829700 | -2.42133600 | -0.01836800 |
| C  | -3.78644000 | -1.30905000 | 0.42090600  |
| C  | -4.99088100 | -1.39874100 | 1.11573600  |

|    |             |             |             |
|----|-------------|-------------|-------------|
| H  | -5.40180900 | -2.36454000 | 1.39261000  |
| C  | -5.64798800 | -0.22065900 | 1.45930300  |
| H  | -6.58542400 | -0.26836000 | 2.00594100  |
| C  | -5.11048600 | 1.01701900  | 1.11890100  |
| H  | -5.61482600 | 1.93698200  | 1.39740000  |
| C  | -3.90419900 | 1.04786700  | 0.42073100  |
| C  | -3.17350300 | 2.23801400  | -0.02322000 |
| C  | -3.63038300 | 3.54681100  | 0.09557500  |
| H  | -4.58439800 | 3.74899100  | 0.57338300  |
| C  | -2.85662000 | 4.58349000  | -0.41525000 |
| H  | -3.20102600 | 5.61038100  | -0.33008600 |
| C  | -1.65043100 | 4.29234500  | -1.04184700 |
| H  | -1.02151700 | 5.07270600  | -1.45923100 |
| C  | -1.24163300 | 2.96619300  | -1.12067000 |
| H  | -0.30472000 | 2.67707300  | -1.59166000 |
| Mn | 1.01715000  | 0.05455800  | 0.59817700  |
| O  | 1.33975700  | 0.05161900  | 2.52988900  |
| O  | 0.31015100  | 0.04329000  | -1.17269700 |
| N  | 1.59376300  | 2.17272600  | 0.55762000  |
| C  | 0.88277900  | 3.14413800  | 1.13126400  |
| H  | -0.00553500 | 2.82904300  | 1.67748600  |
| C  | 1.24296400  | 4.48360200  | 1.03358400  |
| H  | 0.63655900  | 5.24526300  | 1.51473400  |
| C  | 2.37792000  | 4.80942100  | 0.29990100  |
| H  | 2.68722000  | 5.84558200  | 0.19129700  |
| C  | 3.12672800  | 3.79585500  | -0.28920700 |
| H  | 4.02606900  | 4.03409100  | -0.84886300 |
| C  | 2.71512700  | 2.47311100  | -0.13484000 |
| C  | 3.45858200  | 1.30971500  | -0.64849500 |
| N  | 2.96666300  | 0.11931100  | -0.26668600 |
| N  | 1.74736600  | -2.02313700 | 0.57476800  |
| C  | 2.90122900  | -2.24263900 | -0.09427900 |
| C  | 3.54895200  | -1.03430300 | -0.63210300 |
| C  | 4.69149400  | -1.02927600 | -1.43296700 |
| C  | 5.21130200  | 0.19421600  | -1.83974800 |
| C  | 4.60177800  | 1.37977200  | -1.44533900 |
| H  | 5.00635700  | 2.33707200  | -1.75871000 |
| H  | 6.09720400  | 0.22465300  | -2.46805300 |
| H  | 5.16272100  | -1.95797800 | -1.73920100 |
| C  | 3.43586800  | -3.52550800 | -0.19986800 |
| H  | 4.36426200  | -3.69491600 | -0.73671900 |
| C  | 2.77551200  | -4.58473500 | 0.41320900  |
| H  | 3.18099000  | -5.59054900 | 0.34229400  |
| C  | 1.60693100  | -4.34063900 | 1.12559800  |
| H  | 1.06694800  | -5.13888800 | 1.62594700  |
| C  | 1.12470200  | -3.03742900 | 1.17694800  |
| H  | 0.20641200  | -2.78995100 | 1.70788500  |
| O  | -2.02346100 | -0.05039400 | -2.47262100 |
| Cl | 2.99413900  | 0.02466900  | 2.96870300  |
| O  | -0.71505000 | -0.45581300 | -3.39493400 |
| H  | -0.01959900 | -0.32648000 | -2.63270900 |
| H  | -0.85023400 | -1.42559000 | -3.46306500 |

### 1\_c10

|    |             |             |             |
|----|-------------|-------------|-------------|
| O  | -2.22823900 | -0.95028100 | -0.06101600 |
| Cl | -0.56385000 | -1.39562000 | 0.03927400  |
| O  | 2.64488800  | -1.01097400 | 0.30364800  |
| H  | 2.33133200  | -0.30785600 | -0.30715700 |
| H  | 2.27818900  | -1.81370600 | -0.09241400 |
| O  | 0.55224800  | 1.64669800  | 1.28115900  |
| H  | -0.34560500 | 1.64927300  | 0.85354200  |
| O  | 1.52200200  | 1.07423800  | -1.26470500 |
| H  | 0.77051600  | 0.50970200  | -1.50612200 |

|   |             |            |             |
|---|-------------|------------|-------------|
| H | 1.23995000  | 1.41921900 | -0.38229000 |
| O | -1.75809400 | 1.64050800 | -0.20193100 |
| H | -1.98839100 | 0.64970300 | -0.15768500 |
| H | 0.68724400  | 0.70921100 | 1.49132700  |
| H | -1.25022800 | 1.70847900 | -1.02409800 |

**TS1-2\_C1O**

|    |             |             |             |
|----|-------------|-------------|-------------|
| O  | -1.46006200 | -1.73201000 | 0.00836700  |
| Cl | 0.22554000  | -1.34808300 | 0.10069100  |
| O  | 2.73167900  | -0.33927800 | 0.15897700  |
| H  | 2.21557000  | 0.47006900  | -0.09795000 |
| H  | 2.91789600  | -0.75214200 | -0.69683200 |
| O  | -0.79525500 | 1.79424100  | 1.07679200  |
| H  | -1.60192400 | 1.19779700  | 0.17289100  |
| O  | 1.20058500  | 1.82360100  | -0.62024100 |
| H  | 0.79948100  | 1.36502500  | -1.37296100 |
| H  | 0.43742200  | 1.82909300  | 0.06706500  |
| O  | -2.24030800 | 0.67730600  | -0.59120100 |
| H  | -1.84160100 | -0.80672300 | -0.23730500 |
| H  | -0.52063800 | 1.02831300  | 1.59996900  |
| H  | -1.73350200 | 0.79510600  | -1.40817400 |

**TS22C**

|    |             |             |             |
|----|-------------|-------------|-------------|
| Mn | -1.39297600 | 0.00651100  | 0.58290000  |
| O  | -0.78146300 | 0.20164900  | -1.14348500 |
| N  | -2.06644600 | 1.97985000  | 0.57031000  |
| N  | -3.25892100 | -0.15857000 | -0.18655200 |
| N  | -1.62622500 | -2.02175500 | 0.48181800  |
| C  | -1.37292100 | 3.01010000  | 1.06143000  |
| H  | -0.42029500 | 2.76938000  | 1.52829300  |
| C  | -1.84360800 | 4.31480800  | 0.97502500  |
| H  | -1.24816700 | 5.12747400  | 1.37965600  |
| C  | -3.06921600 | 4.54306700  | 0.35998800  |
| H  | -3.46459000 | 5.55127600  | 0.27260000  |
| C  | -3.79487200 | 3.46745100  | -0.14083300 |
| H  | -4.75830200 | 3.62234700  | -0.61711900 |
| C  | -3.27319700 | 2.18277500  | -0.02243300 |
| C  | -3.93731600 | 0.95974000  | -0.48701400 |
| C  | -5.14300400 | 0.87294000  | -1.18336200 |
| H  | -5.70718900 | 1.76557600  | -1.43512600 |
| C  | -5.60221100 | -0.38628800 | -1.55668900 |
| H  | -6.53594900 | -0.47731200 | -2.10425300 |
| C  | -4.87546200 | -1.53112400 | -1.24118600 |
| H  | -5.22946300 | -2.51364400 | -1.53769000 |
| C  | -3.67906500 | -1.38314200 | -0.54262400 |
| C  | -2.77455700 | -2.45350600 | -0.10764000 |
| C  | -3.04254500 | -3.81339100 | -0.21820900 |
| H  | -3.95952700 | -4.14973700 | -0.69262800 |
| C  | -2.13907300 | -4.72915900 | 0.31191400  |
| H  | -2.34046600 | -5.79430700 | 0.23869900  |
| C  | -0.99245700 | -4.26904100 | 0.94727800  |
| H  | -0.26735800 | -4.94959000 | 1.38281900  |
| C  | -0.76709500 | -2.89902200 | 1.00628300  |
| H  | 0.12114200  | -2.47980900 | 1.47219500  |
| Mn | 0.99771500  | 0.13407300  | -0.75433200 |
| O  | 1.29464200  | 0.18330800  | -2.69580700 |
| O  | 0.34894200  | 0.14207700  | 1.00767800  |
| N  | 1.72945600  | -1.93581200 | -0.77241100 |
| C  | 1.11499900  | -2.93375000 | -1.40967800 |
| H  | 0.21148700  | -2.67043000 | -1.95788100 |
| C  | 1.58610400  | -4.24127200 | -1.36800500 |
| H  | 1.05435800  | -5.02641300 | -1.89712000 |
| C  | 2.72896900  | -4.50818700 | -0.62264000 |

|    |             |             |             |
|----|-------------|-------------|-------------|
| H  | 3.12191600  | -5.51917700 | -0.55448000 |
| C  | 3.37998800  | -3.46529700 | 0.02767600  |
| H  | 4.28925200  | -3.65147300 | 0.59114500  |
| C  | 2.86252500  | -2.17505300 | -0.07540900 |
| C  | 3.50801200  | -0.98097900 | 0.49695500  |
| N  | 2.94982800  | 0.18605900  | 0.13419100  |
| N  | 1.59283300  | 2.27752500  | -0.63406600 |
| C  | 2.69577300  | 2.54617400  | 0.09816600  |
| C  | 3.43280700  | 1.36066400  | 0.57119200  |
| C  | 4.55327200  | 1.40144700  | 1.40220900  |
| C  | 5.14425400  | 0.20233600  | 1.78279300  |
| C  | 4.62510000  | -1.00589800 | 1.33266100  |
| H  | 5.07625700  | -1.94629800 | 1.63364300  |
| H  | 6.01161200  | 0.20963600  | 2.43715200  |
| H  | 4.95305200  | 2.34745200  | 1.75375100  |
| C  | 3.08643000  | 3.86052100  | 0.34964700  |
| H  | 3.97055500  | 4.07201000  | 0.94333200  |
| C  | 2.33185200  | 4.90219100  | -0.17982700 |
| H  | 2.62422000  | 5.93248900  | 0.00525800  |
| C  | 1.20993700  | 4.61219900  | -0.94791400 |
| H  | 0.59705200  | 5.39697200  | -1.38153100 |
| C  | 0.87313900  | 3.27715100  | -1.14355600 |
| H  | -0.00391500 | 2.98839000  | -1.72249100 |
| O  | -2.07695200 | 0.07591800  | 2.34480600  |
| Cl | 2.94742800  | 0.11777000  | -3.14391600 |
| O  | -1.54479000 | -1.15999600 | 3.33679500  |
| H  | -0.51200500 | -0.97468700 | 3.42666400  |
| H  | -1.94277500 | -0.83091600 | 4.16903500  |
| O  | 0.98652700  | -0.77351900 | 3.39239200  |
| H  | 1.16514700  | -0.01496600 | 3.97238100  |
| H  | 0.95089900  | -0.37825400 | 2.47680900  |
